# Supplementary material for: Breaking scaling relations for efficient CO2 electrochemical reduction through dual-atom catalysts
Source: PubMed Central journal article supplement — Chem Sci. 2020 Jan 6;11(7):1807–13. doi: 10.1039/c9sc05236d (PMC8148381; doi:10.1039/c9sc05236d), 2020-01-06
Supplement: SC-011-C9SC05236D-s001.pdf [file SC-011-C9SC05236D-s001.pdf]

## Supporting Information

### Breaking scaling relations for efficient CO<sub>2</sub> electrochemical reduction through dual-atom catalysts

Yixin Ouyang, Li Shi, Xiaowan Bai, Qiang Li and Jinlan Wang\*  
School of Physics, Southeast University, Nanjing 211189, China  
\*email: jlwang@seu.edu.cn

#### Computational details

The scaling relations on transition-metal surface are mainly reported by Norskov et al, hence, in the calculation of scaling relations of binding energies, to compare the scaling relations of dual-atom catalysts with that of transition-metals, we used the same calculation equations reported by Norskov et al.<sup>1</sup> The binding energies of \*CO, \*COOH, and \*CHO are calculated through

$$E_b(\text{CO}) = E(*\text{CO}) + \Delta E_{\text{sol}}(\text{CO}) - E^* - E(\text{CO}_{(\text{g})})$$

$$E_b(\text{COOH}) = E(*\text{COOH}) + \Delta E_{\text{sol}}(\text{COOH}) - E^* - E(\text{CO}_{2(\text{g})}) - 1/2E(\text{H}_2)$$

$$E_b(\text{CHO}) = E(*\text{CHO}) + \Delta E_{\text{sol}}(\text{CHO}) - E^* - E(\text{CO}_{(\text{g})}) - 1/2E(\text{H}_2)$$

$E_b(\text{CO})$ ,  $E_b(\text{COOH})$ , and  $E_b(\text{CHO})$  are the binding energies of \*CO, \*COOH, and \*CHO, respectively. The  $\Delta E_{\text{sol}}$  indicates a solvation correction to binding energy. For \*CO, \*COOH, and \*CHO, the solvation correction is -0.1 eV, -0.25 eV and -0.1 eV, respectively.

For gas-phase species, the standard ideal-gas method was used to calculate the free energy.<sup>2</sup> The energy corrections of gas-phase species, including zero point energies, heat capacities, and entropies, are listed below:

**Table S1.** Free energy corrections for gas-phase species.

| Molecule           | ZPE (eV) | $\int C_p dT$ (eV) | -TS (eV) |
|--------------------|----------|--------------------|----------|
| CO <sub>2</sub>    | 0.31     | 0.10               | -0.66    |
| CO                 | 0.13     | 0.09               | -0.61    |
| H <sub>2</sub>     | 0.28     | 0.09               | -0.40    |
| H <sub>2</sub> O   | 0.57     | 0.10               | -0.67    |
| CH <sub>3</sub> OH | 1.37     | 0.12               | -0.81    |
| HCOOH              | 0.90     | 0.11               | -0.99    |
| CH <sub>4</sub>    | 1.20     | 0.11               | -0.58    |
| HCHO               | 0.71     | 0.11               | -0.68    |

The dissolution potentials were calculated by  $U_{\text{diss}} = U_{\text{diss(Metal,Bulk)}} - (\mu_{\text{Metal,dim}} - \mu_{\text{Metal,Bulk}})/ne$ , where  $U_{\text{diss(Metal,Bulk)}}$ ,  $\mu_{\text{Metal,dim}}$ ,  $\mu_{\text{Metal,Bulk}}$ , and  $n$  are the dissolution potential of bulk metals, the chemical potential of metal atom in dimer system, the chemical potential of metal atom in bulk, and the number of electrons involved in the dissolution, respectively.<sup>3</sup> Computational hydrogen electrode (CHE)<sup>4</sup> model was used to calculate the Gibbs free energy change of CO<sub>2</sub>RR elementary reactions. At electrode potential  $U = 0$  V (vs. reversible hydrogen electrode), the free energy can be calculated by  $\Delta G = \Delta E - T\Delta S + \Delta ZPE$ .  $\Delta E$  is reaction energy of hydrogenation.  $T\Delta S$  is the gas-phase entropy contribution at 298 K.  $\Delta ZPE$  is the zero-point energy correction. The electrode potential,  $U$  (vs. reversible hydrogen electrode), is considered by  $\Delta G_n(U) = \Delta G_n(U=0) + neU$  when  $n$  electrons are transferred. The Poisson–Boltzmann (PB) implicit solvation model, VaspSol,<sup>5</sup> was used to describe the effect of solvation as implemented in VASP, with a dielectric constant  $\epsilon=80$  for water. The solvation energy was directly contained in the total energy.

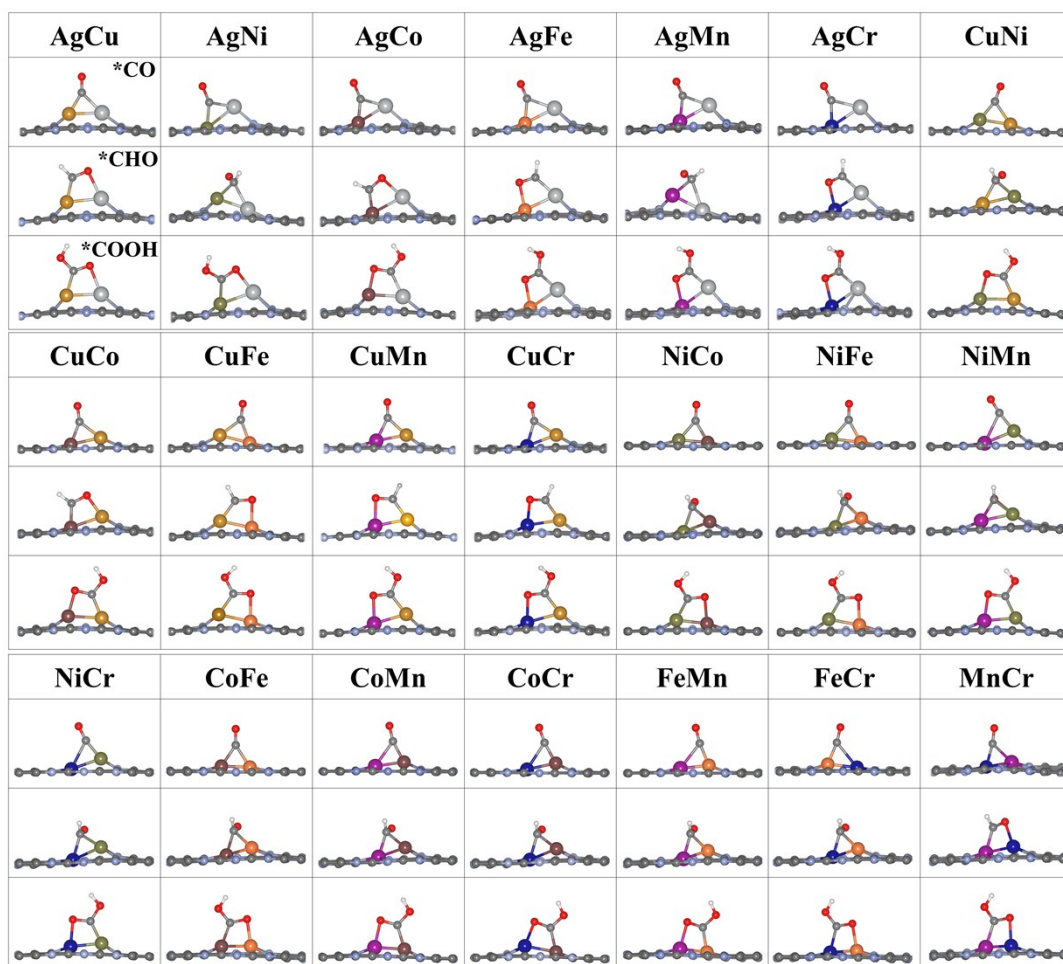

**Figure S1.** Optimized geometries of \*CO, \*CHO and \*COOH adsorbed M<sub>1</sub>M<sub>2</sub>/C<sub>2</sub>N.

**Table S2.** Binding energies of \*CO, \*CHO, and \*COOH without solvation correction.

| Metal dimers | *CO (eV) | *CHO (eV) | *COOH (eV) | Metal dimers | *CO (eV) | *CHO (eV) | *COOH (eV) |
|--------------|----------|-----------|------------|--------------|----------|-----------|------------|
| CuCr         | -2.05    | -2.02     | -1.49      | NiCr         | -2.36    | -1.91     | -1.38      |
| CuMn         | -2.12    | -2.10     | -1.66      | NiMn         | -2.25    | -1.94     | -1.30      |
| CuFe         | -2.65    | -1.99     | -1.48      | NiFe         | -2.46    | -1.78     | -1.30      |
| CuCo         | -2.70    | -1.89     | -1.14      | NiCo         | -2.59    | -2.04     | -1.00      |
| CuNi         | -2.48    | -1.72     | -0.91      | CoFe         | -2.40    | -2.02     | -1.33      |
| CuAg         | -1.78    | -1.08     | -0.71      | CoCr         | -2.30    | -1.94     | -1.03      |
| AgNi         | -2.19    | -1.33     | -0.57      | CoMn         | -2.30    | -1.97     | -1.35      |
| AgCo         | -2.05    | -1.43     | -0.55      | FeCr         | -1.78    | -1.83     | -1.10      |
| AgFe         | -2.51    | -1.75     | -1.35      | FeMn         | -2.34    | -1.95     | -1.47      |
| AgMn         | -1.33    | -1.00     | -0.92      | CrMn         | -1.37    | -1.60     | -1.04      |
| AgCr         | -1.35    | -1.14     | -0.74      |              |          |           |            |

Considering strict solvation corrections may have effect on scaling relations,<sup>6</sup> we used implicit solvation models implemented by VASPsol to calculate the scaling relations of \*CO, \*CHO and \*COOH, as shown in Fig. S2. Comparing the scaling relations with constant solvation corrections and solvation corrections calculated by VASPsol (Fig. 1d, 1e and Fig. S2), we can find that the four metal dimers (CuMn, CuCr, FeCr and MnCr) approach the desired low overpotential region with both solvation corrections. Because of the strong ability of dual-sites to stabilize \*CHO and \*COOH, the solvation effect has very limited impacts on scaling relations.

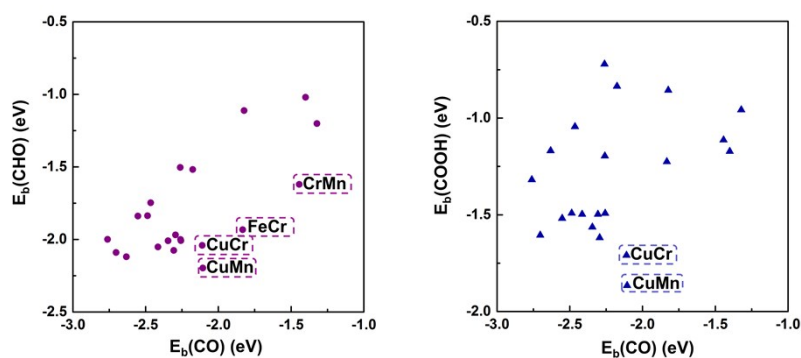**Figure S2.** Scaling relations of binding energies of \*CO, \*CHO and \*COOH with solvation corrections calculated by VASPsol.

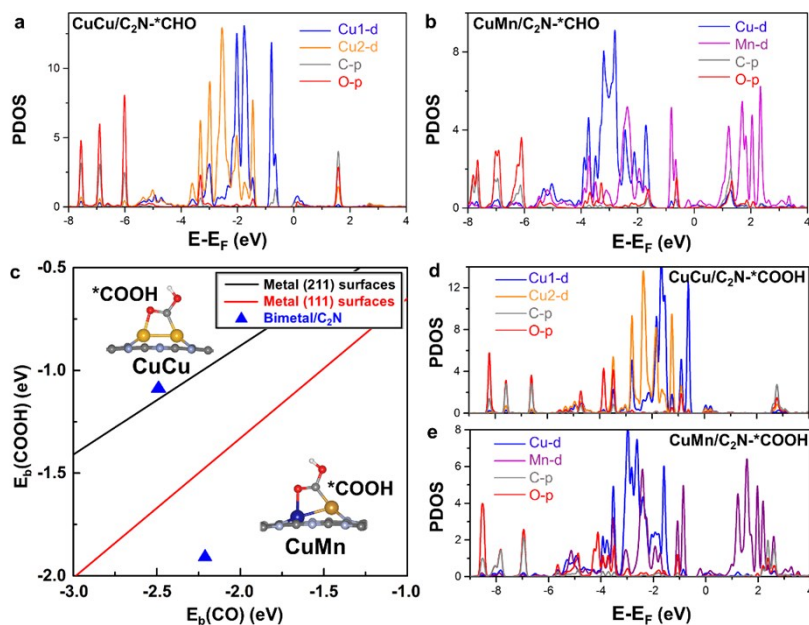

**Figure S3.** Projected density of states (PDOS) of the (a) CuCu/C<sub>2</sub>N and (b) CuMn/C<sub>2</sub>N with adsorbed \*CHO species. (c) Relationship between binding energies E<sub>b</sub>(COOH) and E<sub>b</sub>(CO) for the C<sub>2</sub>N supported CuCu and CuMn dimers. Projected density of states (PDOS) of the (d) CuCu/C<sub>2</sub>N and (e) CuMn/C<sub>2</sub>N with adsorbed \*COOH species.

The projected density of states (PDOS) of the CuCu/C<sub>2</sub>N with \*CHO adsorbate (CuCu/C<sub>2</sub>N-\*CHO) is compared to the CuMn/C<sub>2</sub>N-\*CHO (Figure S2a and S2b). The sharp peaks at around -8~-6 eV correspond to the covalent C-O bond without much mixing with the metal atoms. For CuMn/C<sub>2</sub>N-\*CHO, the O-2p states are delocalized and have strong hybridization with Mn-3d states in a broad energy range from -4 to 0 eV. In contrast, the O in CHO\* adsorbate and the Cu in CuCu/C<sub>2</sub>N have much weaker hybridization.

The scaling relations between \*COOH and \*CO on CuCu/C<sub>2</sub>N and CuMn/C<sub>2</sub>N are shown in Figure S2c. The CuCu/C<sub>2</sub>N still follow the linear scaling relationship of pure metal surfaces, indicating the high limiting potential for CO<sub>2</sub> reduction. Similar to the PDOS analysis in \*CHO adsorbate, the hybridization between Mn-3d states and O-2p states in CuMn/C<sub>2</sub>N-\*COOH is strong, and the hybridization between Cu-3d states and O-2p states in CuCu/C<sub>2</sub>N-\*COOH is weak (Figure S2d and S2e).

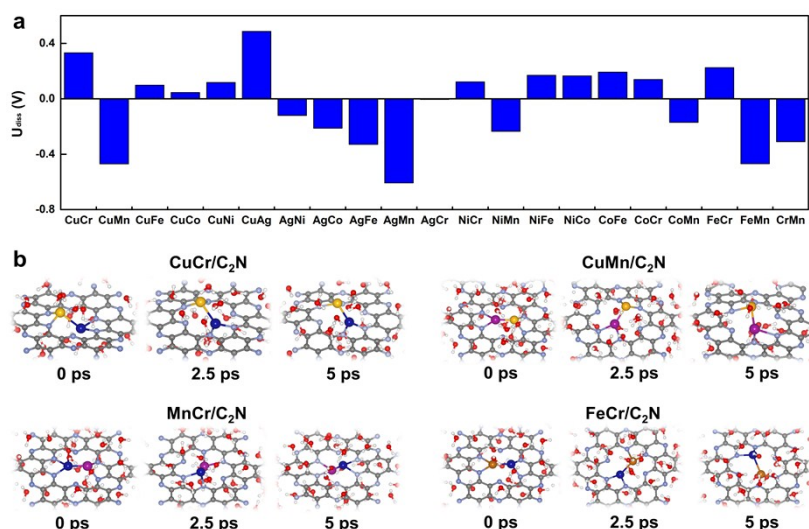

**Figure S4.** (a) Dissolution potentials ( $U_{\text{diss}}$ ) of TM atoms on  $C_2N$  at pH 0 (b) Ab initio molecular dynamics simulations of structural evolution of CuCr/ $C_2N$ , CuMn/ $C_2N$ , FeCr/ $C_2N$ , and MnCr/ $C_2N$  in acidic aqueous solution in 5 picoseconds at 300 K. In order to simulate the electrical double layer, a charged aqueous interface model was used. Two H atoms were located in bulk water as solvated  $H^+$  in solution, and electrons entered in slab spontaneously.

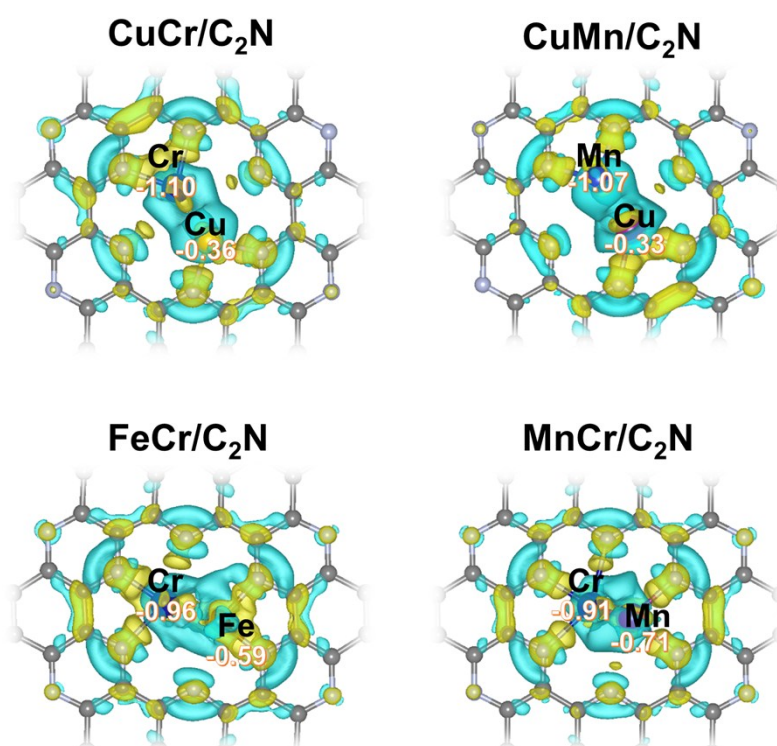

**Figure S5.** Difference charge density and Bader charge for CuCr/ $C_2N$ , CuMn/ $C_2N$ , FeCr/ $C_2N$ , and MnCr/ $C_2N$ . Charge depletion and accumulation are displayed in cyan and yellow, respectively. Negative charges indicate that electrons are transferred from the metal atoms to  $C_2N$ .

**Table S3.** Free energy corrections for intermediates.

| Metal dimers | Adsorbate           | ZPE (eV) | TS (eV) | $\int C_p dT$ (eV) |
|--------------|---------------------|----------|---------|--------------------|
| CuCr         | *COOH               | 0.645    | 0.172   | 0.099              |
|              | *OCHO               | 0.650    | 0.203   | 0.098              |
|              | *CO                 | 0.193    | 0.144   | 0.068              |
|              | *COH                | 0.497    | 0.128   | 0.069              |
|              | *CHO                | 0.480    | 0.122   | 0.066              |
|              | *CHOH               | 0.777    | 0.171   | 0.084              |
|              | *OCH <sub>2</sub>   | 0.790    | 0.154   | 0.074              |
|              | *CH <sub>2</sub> OH | 1.094    | 0.172   | 0.089              |
|              | *OCH <sub>3</sub>   | 1.411    | 0.221   | 0.102              |
|              | *O                  | 0.077    | 0.051   | 0.028              |
| *OH          | 0.374               | 0.070    | 0.041   |                    |
| <hr/>        |                     |          |         |                    |
| Metal dimers | Adsorbate           | ZPE (eV) | TS (eV) | $\int C_p dT$ (eV) |
| CuMn         | *COOH               | 0.647    | 0.174   | 0.099              |
|              | *OCHO               | 0.651    | 0.199   | 0.097              |
|              | *CO                 | 0.193    | 0.076   | 0.045              |
|              | *COH                | 0.488    | 0.150   | 0.074              |
|              | *CHO                | 0.473    | 0.134   | 0.070              |
|              | *CHOH               | 0.775    | 0.181   | 0.085              |
|              | *OCH <sub>2</sub>   | 0.731    | 0.082   | 0.046              |
|              | *CH <sub>2</sub> OH | 1.052    | 0.106   | 0.060              |
|              | *OCH <sub>3</sub>   | 1.104    | 0.189   | 0.095              |
|              | *O                  | 0.077    | 0.051   | 0.028              |
| *OH          | 0.367               | 0.078    | 0.044   |                    |

| Metal dimers | Adsorbate           | ZPE (eV) | TS (eV) | $\int C_p dT$ (eV) |
|--------------|---------------------|----------|---------|--------------------|
| FeCr         | *COOH               | 0.604    | 0.161   | 0.083              |
|              | *OCHO               | 0.626    | 0.209   | 0.100              |
|              | *CO                 | 0.203    | 0.141   | 0.067              |
|              | *COH                | 0.499    | 0.138   | 0.070              |
|              | *CHO                | 0.477    | 0.113   | 0.063              |
|              | *CHOH               | 0.766    | 0.141   | 0.070              |
|              | *OCH <sub>2</sub>   | 0.788    | 0.137   | 0.072              |
|              | *CH <sub>2</sub> OH | 1.102    | 0.171   | 0.087              |
|              | *OCH <sub>3</sub>   | 1.103    | 0.230   | 0.100              |
|              | *O                  | 0.078    | 0.049   | 0.028              |
| *OH          | 0.365               | 0.076    | 0.044   |                    |

| Metal dimers | Adsorbate           | ZPE (eV) | TS (eV) | $\int C_p dT$ (eV) |
|--------------|---------------------|----------|---------|--------------------|
| CrMn         | *COOH               | 0.605    | 0.162   | 0.081              |
|              | *OCHO               | 0.629    | 0.203   | 0.099              |
|              | *CO                 | 0.196    | 0.131   | 0.066              |
|              | *COH                | 0.494    | 0.171   | 0.073              |
|              | *CHO                | 0.464    | 0.128   | 0.069              |
|              | *CHOH               | 0.768    | 0.153   | 0.081              |
|              | *OCH <sub>2</sub>   | 0.776    | 0.148   | 0.075              |
|              | *CH <sub>2</sub> OH | 1.071    | 0.207   | 0.098              |
|              | *OCH <sub>3</sub>   | 1.107    | 0.193   | 0.095              |
|              | *O                  | 0.075    | 0.052   | 0.029              |
| *OH          | 0.364               | 0.077    | 0.044   |                    |

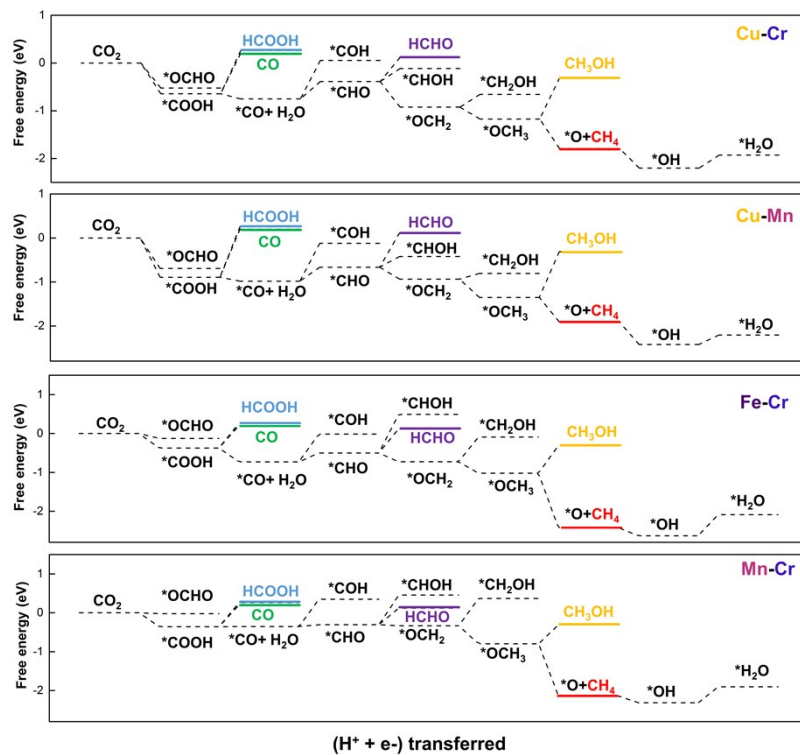

**Figure S6.** Free energy profiles for the CO<sub>2</sub> reduction reaction to CO, HCOOH, HCHO, CH<sub>4</sub> and CH<sub>3</sub>OH on M<sub>1</sub>M<sub>2</sub>/C<sub>2</sub>N (M<sub>1</sub>M<sub>2</sub> = CuCr, CuMn, FeCr, and MnCr), at zero applied voltage (vs. RHE).



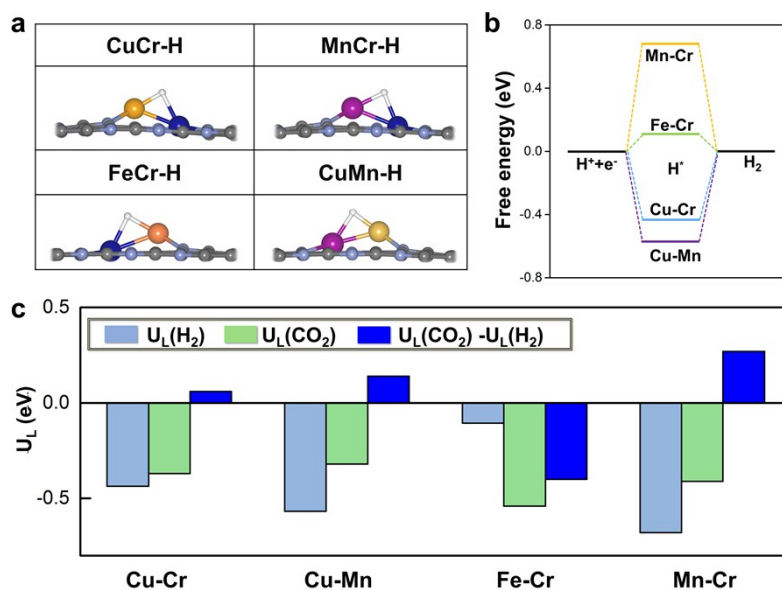

**Figure S7.** (a) Optimized geometries of  $*H$  adsorbed  $M_1M_2/C_2N$ . (b) Free energy diagrams of HER (c) Calculated limiting potentials for HER  $U_L(H_2)$ , limiting potentials for CO<sub>2</sub>RR  $U_L(CO_2)$  and  $U_L(CO_2) - U_L(H_2)$  on  $M_1M_2/C_2N$  ( $M_1M_2 = CuCr, CuMn, FeCr, \text{ and } MnCr$ ).

## References

- (1) K. Chan, C. Tsai, H. A. Hansen and J. K. Nørskov, *ChemCatChem*, 2014, **6**, 1899-1905.
- (2) A. A. Peterson and J. K. Nørskov, *J. Phys. Chem. Lett.*, 2012, **3**, 251-258.
- (3) J. Greeley, J. K. Nørskov, *Electrochim. Acta.*, 2007, **52**, 5829-5836
- (4) A. A. Peterson, F. Abild-Pedersen, F. Studt, J. Rossmeisl and J. K. Nørskov, *Energy Environ. Sci.*, 2010, **3**, 1311-1315.
- (5) K. Mathew, R. Sundararaman, K. Letchworth-weaver, T. A. Arias and R. G. Hennig, *J. Chem. Phys.* 2014, **140**, 084106.
- (6) . F. Calle-Vallejo, A. Krabbe and J. M. Garcia-Lastra, *Chem. Sci.*, 2017, **8**, 124-130.

## Atoms Coordinate

C<sub>2</sub>N-AgCu\*CO

|               |               |               |
|---------------|---------------|---------------|
| 16.6396408081 | 0.0000000000  | 0.0000000000  |
| -8.3201839081 | 14.4105558332 | 0.0000000000  |
| 0.0000000000  | 0.0000000000  | 18.0000000000 |

| C  | N  | Cu | Ag | O |
|----|----|----|----|---|
| 49 | 24 | 1  | 1  | 1 |

Cartesian

|              |              |             |
|--------------|--------------|-------------|
| -1.393503070 | 4.703249931  | 8.928036690 |
| -0.680610895 | 3.469956636  | 9.015453339 |
| 1.481289387  | 4.736260414  | 9.209017754 |
| 0.775261164  | 3.487832546  | 9.112036705 |
| -0.679445982 | 5.979340553  | 8.962335587 |
| 5.643835068  | 2.316928625  | 8.989910126 |
| 2.755599022  | 2.339499950  | 9.113263130 |
| 3.477998734  | 3.574681520  | 9.201477051 |
| 4.943076134  | 3.548417807  | 9.163704872 |
| 3.469318867  | 1.070594072  | 9.018261909 |
| 0.732141733  | 5.990228653  | 9.170269012 |
| 4.895642757  | 1.064653516  | 8.938336372 |
| 6.984239578  | 4.665651321  | 9.101156235 |
| 7.655509949  | 3.427815676  | 8.935689926 |
| 9.836183548  | 4.678431034  | 8.852206230 |
| 9.120747566  | 3.438971758  | 8.852082253 |
| 7.705757141  | 5.915054798  | 9.101963997 |
| 13.994285583 | 2.300622702  | 8.915965080 |
| 11.099276543 | 2.299366951  | 8.810820580 |
| 11.812477112 | 3.535361528  | 8.810508728 |
| 13.278549194 | 3.539404392  | 8.843513489 |
| 11.829043388 | 1.027774215  | 8.845515251 |
| 9.113373756  | 5.952746868  | 8.936315536 |
| 13.259779930 | 1.027863264  | 8.917558670 |
| -5.613962173 | 11.924736977 | 8.898165703 |
| -4.896199703 | 10.687722206 | 8.815370560 |
| -2.721278191 | 11.925549507 | 8.746532440 |
| -3.433668852 | 10.691300392 | 8.747412682 |
| -4.880076408 | 13.196274757 | 8.898220062 |
| 1.374831676  | 9.564349174  | 9.037808418 |
| -1.459200859 | 9.546988487  | 8.750218391 |
| -0.742632866 | 10.787990570 | 8.750072479 |
| 0.721138477  | 10.801092148 | 8.847167015 |
| -0.739276409 | 8.272680283  | 8.847229958 |
| -3.449843407 | 13.193704605 | 8.814221382 |
| 0.658548832  | 8.324748993  | 9.037931442 |

|              |              |              |
|--------------|--------------|--------------|
| 2.737413883  | 11.895725250 | 8.963881493  |
| 3.433258533  | 10.667407990 | 9.171880722  |
| 5.621939182  | 11.882200241 | 9.115865707  |
| 4.893829823  | 10.646100044 | 9.211470604  |
| 3.485264301  | 13.152459145 | 8.931224823  |
| 9.780335426  | 9.524481773  | 8.939193726  |
| 6.897880077  | 9.497269630  | 9.204700470  |
| 7.606037140  | 10.740457535 | 9.114762306  |
| 9.061716080  | 10.756719589 | 9.018477440  |
| 7.653004646  | 8.241515160  | 9.166784286  |
| 4.909680367  | 13.152232170 | 9.019453049  |
| 9.069647789  | 8.250341415  | 8.991199493  |
| 3.796720505  | 7.334179401  | 11.768722534 |
| 6.988563061  | 2.272239447  | 8.897573471  |
| 5.638482094  | 4.695604801  | 9.260109901  |
| -1.401819468 | 7.113617420  | 8.830598831  |
| 2.827521801  | 4.748982430  | 9.264410019  |
| 1.421098590  | 2.322293520  | 9.081068039  |
| 1.374575615  | 7.182633877  | 9.276965141  |
| -1.311196685 | 2.288494349  | 9.000837326  |
| 13.908516884 | 4.715849876  | 8.840356827  |
| 7.007287025  | 7.065663338  | 9.262023926  |
| 11.170803070 | 4.708656788  | 8.820175171  |
| 9.762088776  | 2.268241405  | 8.819850922  |
| 9.780577660  | 7.108054161  | 8.898077965  |
| 2.721745968  | 9.514719009  | 9.277065277  |
| 1.394073486  | 11.954192162 | 8.830674171  |
| -5.558551311 | 14.343964577 | 8.994668007  |
| -1.383337021 | 11.958337784 | 8.731280327  |
| -2.793368816 | 9.516651154  | 8.732421875  |
| -2.744676113 | 14.326060295 | 8.832217216  |
| 11.115358353 | 9.510527611  | 8.833598137  |
| 9.692714691  | 11.938296318 | 8.993864059  |
| 2.805451393  | 14.304606438 | 8.843521118  |
| 6.954201221  | 11.905037880 | 9.083971024  |
| 5.555692673  | 9.473685265  | 9.267751694  |
| 5.617490768  | 14.289181709 | 9.004242897  |
| 2.983672142  | 7.807035446  | 10.196494102 |
| 5.092762470  | 6.591380119  | 10.288834572 |
| 3.791506767  | 7.334587097  | 12.943072319 |

C<sub>2</sub>N-AgCu\*CHO

| C  | N  | Cu | Ag | O | H |
|----|----|----|----|---|---|
| 49 | 24 | 1  | 1  | 1 | 1 |

Cartesian

|              |              |             |
|--------------|--------------|-------------|
| -1.444348097 | 4.712150574  | 8.829773903 |
| -0.729253650 | 3.483434677  | 8.937594414 |
| 1.437794685  | 4.745280743  | 9.118242264 |
| 0.731032610  | 3.501375914  | 9.042317390 |
| -0.723434448 | 5.989473820  | 8.829035759 |
| 5.598914146  | 2.330100536  | 9.027000427 |
| 2.711777687  | 2.355967283  | 9.102167130 |
| 3.430196524  | 3.588185310  | 9.203435898 |
| 4.895808220  | 3.562030077  | 9.202644348 |
| 3.428778648  | 1.080316067  | 9.027863503 |
| 0.692665339  | 5.997601509  | 9.019566536 |
| 4.853930950  | 1.073629618  | 8.961443901 |
| 6.926630974  | 4.680318356  | 9.161118507 |
| 7.605168819  | 3.446846485  | 8.974475861 |
| 9.783157349  | 4.695132256  | 8.868599892 |
| 9.067701340  | 3.455190182  | 8.872253418 |
| 7.654334545  | 5.935823441  | 9.168660164 |
| 13.941913605 | 2.315574646  | 8.863182068 |
| 11.045843124 | 2.314003706  | 8.790408134 |
| 11.759469032 | 3.550688982  | 8.782649994 |
| 13.224971771 | 3.552072287  | 8.788320541 |
| 11.776905060 | 1.044116735  | 8.808534622 |
| 9.060234070  | 5.966172218  | 8.974386215 |
| 13.206457138 | 1.041191459  | 8.874989510 |
| -5.652662277 | 11.933279991 | 8.911007881 |
| -4.937567234 | 10.697387695 | 8.810190201 |
| -2.761782646 | 11.936408043 | 8.708724022 |
| -3.476199150 | 10.700024605 | 8.705034256 |
| -4.918768883 | 13.204233170 | 8.907912254 |
| 1.351388454  | 9.568537712  | 8.893655777 |
| -1.499073029 | 9.555351257  | 8.641584396 |
| -0.781245708 | 10.797065735 | 8.652618408 |
| 0.683167458  | 10.806706429 | 8.734806061 |
| -0.775282860 | 8.281400681  | 8.705681801 |
| -3.490455627 | 13.203541756 | 8.810369492 |
| 0.630673409  | 8.319920540  | 8.871857643 |
| 2.693232536  | 11.904891968 | 8.885034561 |
| 3.392437935  | 10.673811913 | 9.082871437 |
| 5.573822021  | 11.890711784 | 9.092645645 |
| 4.850420475  | 10.655884743 | 9.181223869 |
| 3.438199997  | 13.168596268 | 8.878374100 |
| 9.739432335  | 9.536199570  | 8.969526291 |
| 6.852912426  | 9.511399269  | 9.246942520 |

|              |              |              |
|--------------|--------------|--------------|
| 7.558643818  | 10.749942780 | 9.135414124  |
| 9.020935059  | 10.766688347 | 9.044784546  |
| 7.609956741  | 8.256974220  | 9.231534004  |
| 4.859916687  | 13.164460182 | 8.980956078  |
| 9.025150299  | 8.262263298  | 9.037079811  |
| 3.138454914  | 7.512266159  | 12.029417992 |
| 6.939462662  | 2.288295507  | 8.934048653  |
| 5.585608482  | 4.709686756  | 9.315270424  |
| -1.438609838 | 7.120111465  | 8.693603516  |
| 2.780555010  | 4.767746449  | 9.226962090  |
| 1.376447320  | 2.332939386  | 9.044333458  |
| 1.347197056  | 7.182595730  | 9.087354660  |
| 15.277795792 | 2.302489758  | 8.940186501  |
| 13.859096527 | 4.728982449  | 8.757557869  |
| 6.965034485  | 7.083119392  | 9.349038124  |
| 11.118056297 | 4.724154949  | 8.811306000  |
| 9.708757401  | 2.283900261  | 8.822664261  |
| 9.731039047  | 7.122575760  | 8.936190605  |
| 2.689191818  | 9.515290260  | 9.143676758  |
| 1.357326508  | 11.961366653 | 8.744237900  |
| -5.598661423 | 14.354628563 | 9.005651474  |
| -1.425029278 | 11.967288971 | 8.667269707  |
| -2.834478617 | 9.527149200  | 8.652887344  |
| -2.785363674 | 14.337854385 | 8.841347694  |
| 11.071493149 | 9.519929886  | 8.841635704  |
| 9.651498795  | 11.947113991 | 9.017946243  |
| 2.754889488  | 14.316123962 | 8.795646667  |
| 6.908545494  | 11.916549683 | 9.082079887  |
| 5.506076336  | 9.482851982  | 9.287189484  |
| 5.566971779  | 14.302865982 | 8.964863777  |
| 2.854357719  | 7.843017101  | 10.209095955 |
| 5.088743210  | 6.620684624  | 10.469879150 |
| 4.146448612  | 6.926592350  | 12.494970322 |
| 2.379055500  | 7.820550919  | 12.803435326 |

C<sub>2</sub>N-AgCu\*COOH

| C  | N  | Cu | Ag | O | H |
|----|----|----|----|---|---|
| 49 | 24 | 1  | 1  | 2 | 1 |

Cartesian

|              |             |             |
|--------------|-------------|-------------|
| -1.453732967 | 4.718145847 | 8.875386238 |
| -0.738563538 | 3.488175869 | 8.964486122 |
| 1.431513309  | 4.748782635 | 9.127386093 |
| 0.723519802  | 3.506174564 | 9.046133995 |
| -0.734000921 | 5.994921207 | 8.885897636 |

|              |              |              |
|--------------|--------------|--------------|
| 5.590611458  | 2.335691690  | 8.941698074  |
| 2.703848839  | 2.359987736  | 9.049697876  |
| 3.422874928  | 3.591989756  | 9.143154144  |
| 4.887937546  | 3.568485975  | 9.112806320  |
| 3.420891762  | 1.085013986  | 8.961786270  |
| 0.684228659  | 6.004316330  | 9.067157745  |
| 4.845618725  | 1.079148889  | 8.889444351  |
| 6.913277626  | 4.688114166  | 9.057366371  |
| 7.594985485  | 3.453273535  | 8.889353752  |
| 9.775054932  | 4.700118065  | 8.813123703  |
| 9.059364319  | 3.460954428  | 8.813646317  |
| 7.640798092  | 5.944714546  | 9.061397552  |
| 13.933403015 | 2.320574999  | 8.889497757  |
| 11.038038254 | 2.319249392  | 8.789327621  |
| 11.751881599 | 3.555703640  | 8.786195755  |
| 13.217009544 | 3.557447433  | 8.816255569  |
| 11.768967628 | 1.049189329  | 8.828333855  |
| 9.050142288  | 5.972901821  | 8.890434265  |
| 13.198486328 | 1.047532082  | 8.898227692  |
| -5.659492493 | 11.939029694 | 8.857926369  |
| -4.943599701 | 10.702504158 | 8.771759987  |
| -2.766874313 | 11.939606667 | 8.698266029  |
| -3.481008291 | 10.704060555 | 8.696969986  |
| -4.926024437 | 13.209335327 | 8.853300095  |
| 1.344798565  | 9.574272156  | 8.955162048  |
| -1.504930496 | 9.559097290  | 8.685323715  |
| -0.787302494 | 10.800121307 | 8.692091942  |
| 0.675662994  | 10.810423851 | 8.786627769  |
| -0.782888412 | 8.285983086  | 8.768754005  |
| -3.496986866 | 13.207880020 | 8.768321991  |
| 0.622195721  | 8.323133469  | 8.941103935  |
| 2.684206009  | 11.911910057 | 8.922132492  |
| 3.384226322  | 10.678582191 | 9.109439850  |
| 5.567173481  | 11.896029472 | 9.086957932  |
| 4.845311165  | 10.660928726 | 9.172584534  |
| 3.429430962  | 13.174447060 | 8.907857895  |
| 9.731669426  | 9.542007446  | 8.901432037  |
| 6.845965385  | 9.516919136  | 9.175590515  |
| 7.552020550  | 10.756024361 | 9.080586433  |
| 9.013987541  | 10.772928238 | 8.981406212  |
| 7.599765301  | 8.261168480  | 9.132497787  |
| 4.851886749  | 13.171161652 | 8.997677803  |
| 9.016746521  | 8.268114090  | 8.951868057  |
| 3.239690781  | 7.518577576  | 12.109446526 |

|              |              |              |
|--------------|--------------|--------------|
| 6.930901527  | 2.293987513  | 8.850456238  |
| 5.573512077  | 4.717987061  | 9.206928253  |
| -1.448227644 | 7.126307964  | 8.759340286  |
| 2.775313616  | 4.770052433  | 9.196344376  |
| 1.368534803  | 2.337680340  | 9.018179893  |
| 1.335715771  | 7.186659813  | 9.150804520  |
| 15.270106316 | 2.307274103  | 8.963532448  |
| 13.849810600 | 4.734689236  | 8.801046371  |
| 6.949325085  | 7.090900898  | 9.225557327  |
| 11.110742569 | 4.729356766  | 8.789327621  |
| 9.700894356  | 2.289131165  | 8.792280197  |
| 9.722146988  | 7.128210545  | 8.853912354  |
| 2.682319641  | 9.523447037  | 9.188225746  |
| 1.347892284  | 11.966410637 | 8.790300369  |
| -5.606406212 | 14.360090256 | 8.942939758  |
| -1.430070877 | 11.971122742 | 8.681471825  |
| -2.839828491 | 9.530536652  | 8.673336029  |
| -2.792450905 | 14.342350006 | 8.785296440  |
| 11.065454483 | 9.525176048  | 8.790984154  |
| 9.643910408  | 11.953454971 | 8.957123756  |
| 2.746253014  | 14.322406769 | 8.824122429  |
| 6.901614666  | 11.923048973 | 9.054810524  |
| 5.502165318  | 9.487462997  | 9.238517761  |
| 5.558835030  | 14.308428764 | 8.984250069  |
| 2.832159519  | 7.865987778  | 10.305414200 |
| 5.077719688  | 6.624791622  | 10.393398285 |
| 4.288475990  | 6.928710461  | 12.491118431 |
| 2.361348629  | 7.900558472  | 13.071924210 |
| 2.740556240  | 7.619898319  | 13.942026138 |

C<sub>2</sub>N-AgNi\*CO

| C  | N  | Ag | Co | O |
|----|----|----|----|---|
| 49 | 24 | 1  | 1  | 1 |

Cartesian

|              |             |             |
|--------------|-------------|-------------|
| -1.531915188 | 4.746289730 | 8.933021545 |
| -0.805896521 | 3.515685558 | 8.985294342 |
| 1.338479757  | 4.791437626 | 9.185165405 |
| 0.655029774  | 3.544131994 | 9.058446884 |
| -0.834089279 | 6.029909611 | 9.025308609 |
| 5.527460575  | 2.451062441 | 8.969561577 |
| 2.656399012  | 2.435254335 | 9.028007507 |
| 3.365698814  | 3.685168028 | 9.090126038 |
| 4.823804855  | 3.697517872 | 9.035118103 |
| 3.374006987  | 1.169877768 | 8.972352028 |

|              |              |              |
|--------------|--------------|--------------|
| 0.570254803  | 6.021220207  | 9.252791405  |
| 4.797445297  | 1.176275969  | 8.953506470  |
| 6.885271072  | 4.778324127  | 8.950086594  |
| 7.543624878  | 3.523092747  | 8.900712013  |
| 9.742365837  | 4.735438347  | 8.794026375  |
| 9.011068344  | 3.505382061  | 8.846712112  |
| 7.635464191  | 5.985424042  | 8.927082062  |
| 13.877285004 | 2.328860998  | 8.913906097  |
| 10.975040436 | 2.333141088  | 8.857332230  |
| 11.697427750 | 3.561799288  | 8.808389664  |
| 13.157981873 | 3.562419176  | 8.844264030  |
| 11.706859589 | 1.060126901  | 8.918010712  |
| 9.041204453  | 6.021695614  | 8.814258575  |
| 13.143101692 | 1.056019902  | 8.938890457  |
| -5.692458153 | 12.015579224 | 8.863811493  |
| -4.969708920 | 10.784211159 | 8.807273865  |
| -2.790213585 | 12.021847725 | 8.883197784  |
| -3.506660223 | 10.786934853 | 8.830169678  |
| -4.958066463 | 13.291547775 | 8.894627571  |
| 1.307592869  | 9.584215164  | 9.230706215  |
| -1.550532341 | 9.613497734  | 8.933238029  |
| -0.828278542 | 10.848064423 | 8.982162476  |
| 0.633364201  | 10.829359055 | 9.080675125  |
| -0.848773479 | 8.332053185  | 9.032382011  |
| -3.521924019 | 13.293665886 | 8.892864227  |
| 0.549171925  | 8.351277351  | 9.271530151  |
| 2.646475315  | 11.923798561 | 9.078246117  |
| 3.344731331  | 10.670526505 | 9.160056114  |
| 5.518511772  | 11.893737793 | 9.051480293  |
| 4.810925961  | 10.643564224 | 9.100961685  |
| 3.377207279  | 13.183886528 | 9.023741722  |
| 9.714944839  | 9.603194237  | 8.816705704  |
| 6.844225407  | 9.545782089  | 8.995697975  |
| 7.523158073  | 10.801950455 | 8.968157768  |
| 8.986613274  | 10.831002235 | 8.894592285  |
| 7.603840351  | 8.330598831  | 8.944883347  |
| 4.800329208  | 13.173683167 | 9.027000427  |
| 9.014450073  | 8.317110062  | 8.827055931  |
| 4.954906940  | 7.054456711  | 11.091383934 |
| 6.870331287  | 2.376041412  | 8.913545609  |
| 5.514761925  | 4.882022381  | 9.031913757  |
| -1.534197807 | 7.177422047  | 8.960273743  |
| 2.690566063  | 4.844641685  | 9.182232857  |
| 1.319596171  | 2.391806364  | 8.999279976  |



|              |              |              |
|--------------|--------------|--------------|
| 1.205493927  | 7.190031528  | 9.494729996  |
| 15.216217995 | 2.328846693  | 8.972153664  |
| 13.774224281 | 4.746635437  | 8.847990036  |
| 6.925396442  | 7.150071144  | 9.052794456  |
| 11.075342178 | 4.743320942  | 8.767979622  |
| 9.635866165  | 2.323457003  | 8.868995667  |
| 9.728900909  | 7.173603535  | 8.780255318  |
| 2.658158302  | 9.522726059  | 9.266147614  |
| 1.306683540  | 11.977722168 | 9.031067848  |
| 2.674339056  | 0.024642050  | 8.937917709  |
| -1.451055050 | 12.030032158 | 8.948304176  |
| -2.884074688 | 9.605557442  | 8.844623566  |
| 5.491055489  | 0.030017188  | 8.917181969  |
| 11.050251007 | 9.601536751  | 8.773830414  |
| 9.608432770  | 12.016976357 | 8.907624245  |
| 2.688861847  | 14.333502769 | 8.965295792  |
| 6.855763435  | 11.951164246 | 8.993070602  |
| 5.486366272  | 9.465746880  | 9.058427811  |
| 5.505071640  | 14.313529968 | 8.988821983  |
| 2.929791451  | 7.254965782  | 10.763837814 |
| 5.078618526  | 6.926332951  | 9.165258408  |
| 5.507169247  | 7.007262707  | 12.293802261 |

C<sub>2</sub>N-AgNi\*CHO

| C            | N  | Ag | Ni          | O | H           |
|--------------|----|----|-------------|---|-------------|
| 49           | 24 | 1  | 1           | 1 | 1           |
| Cartesian    |    |    |             |   |             |
| -1.491239309 |    |    | 4.734487534 |   | 8.892395973 |
| -0.773349166 |    |    | 3.503811359 |   | 8.963352203 |
| 1.400030851  |    |    | 4.763567924 |   | 9.129636765 |
| 0.682893515  |    |    | 3.521781206 |   | 9.077814102 |
| -0.774327517 |    |    | 6.006953716 |   | 8.904222488 |
| 5.547323227  |    |    | 2.330316544 |   | 9.084258080 |
| 2.657615662  |    |    | 2.366573572 |   | 9.172260284 |
| 3.390177965  |    |    | 3.598301411 |   | 9.274463654 |
| 4.848958969  |    |    | 3.558931828 |   | 9.311382294 |
| 3.363035440  |    |    | 1.085619330 |   | 9.109962463 |
| 0.652088881  |    |    | 6.023294926 |   | 9.010764122 |
| 4.787563324  |    |    | 1.076093912 |   | 9.028440475 |
| 6.912879944  |    |    | 4.647533894 |   | 9.256788254 |
| 7.567505360  |    |    | 3.425043106 |   | 8.997983932 |
| 9.730368614  |    |    | 4.705176353 |   | 8.909567833 |
| 9.022575378  |    |    | 3.456487179 |   | 8.862839699 |
| 7.608435631  |    |    | 5.903529167 |   | 9.280692101 |

|              |              |              |
|--------------|--------------|--------------|
| 13.899706841 | 2.339135885  | 8.826569557  |
| 11.007596016 | 2.343185425  | 8.727696419  |
| 11.714175224 | 3.580835819  | 8.779625893  |
| 13.178596497 | 3.579538822  | 8.798219681  |
| 11.738648415 | 1.079768538  | 8.703845978  |
| 9.003276825  | 5.965682030  | 9.070757866  |
| 13.165532112 | 1.067404270  | 8.782793999  |
| -5.737540722 | 11.930974960 | 9.042606354  |
| -5.021930218 | 10.688799858 | 8.978112221  |
| -2.847859383 | 11.933755875 | 8.833355904  |
| -3.556094170 | 10.694765091 | 8.873009682  |
| -5.001851082 | 13.206625938 | 9.023112297  |
| 1.294687748  | 9.599015236  | 8.792838097  |
| -1.566730499 | 9.568408012  | 8.776709557  |
| -0.859210968 | 10.813566208 | 8.725859642  |
| 0.608338356  | 10.835354805 | 8.703378677  |
| -0.828364134 | 8.298808098  | 8.808119774  |
| -3.574452877 | 13.202793121 | 8.918747902  |
| 0.589481831  | 8.335700035  | 8.854434013  |
| 2.618254185  | 11.958931923 | 8.717165947  |
| 3.324222088  | 10.731122971 | 8.836469650  |
| 5.508568764  | 11.913465500 | 8.962595940  |
| 4.776372433  | 10.691566467 | 8.977499962  |
| 3.377514362  | 13.208629608 | 8.720009804  |
| 9.643737793  | 9.530694962  | 9.121409416  |
| 6.748041630  | 9.498847961  | 9.240768433  |
| 7.469904423  | 10.743112564 | 9.163259506  |
| 8.932353973  | 10.762841225 | 9.150354385  |
| 7.487997055  | 8.239869118  | 9.344087601  |
| 4.803615570  | 13.189520836 | 8.835929871  |
| 8.919205666  | 8.253473282  | 9.183617592  |
| 4.491510391  | 7.390410423  | 11.679803848 |
| 6.884943008  | 2.271997213  | 8.950985909  |
| 5.574927330  | 4.691961765  | 9.490356445  |
| -1.492772579 | 7.141813755  | 8.825345993  |
| 2.738756180  | 4.779505730  | 9.249444008  |
| 1.327975392  | 2.351961374  | 9.099017143  |
| 1.307186604  | 7.195637226  | 8.984807968  |
| 15.233432770 | 2.322808743  | 8.917110443  |
| 13.812196732 | 4.753869057  | 8.818973541  |
| 6.863915443  | 7.030895710  | 9.513197899  |
| 11.065399170 | 4.748378754  | 8.854523659  |
| 9.672033310  | 2.296552658  | 8.755632401  |
| 9.653116226  | 7.134594440  | 9.077022552  |

|              |              |              |
|--------------|--------------|--------------|
| 2.638896465  | 9.578163147  | 8.861364365  |
| 1.272871017  | 11.999165535 | 8.654057503  |
| -5.672075272 | 14.362842560 | 9.110861778  |
| -1.513785839 | 11.976886749 | 8.748521805  |
| -2.901211977 | 9.527423859  | 8.837964058  |
| -2.862413406 | 14.333459854 | 8.923913956  |
| 10.981616020 | 9.512941360  | 9.024461746  |
| 9.566204071  | 11.944059372 | 9.121157646  |
| 2.706465721  | 14.360450745 | 8.655858040  |
| 6.842177868  | 11.915959358 | 9.045432091  |
| 5.402667999  | 9.505058289  | 9.124199867  |
| 5.518417358  | 14.322406769 | 8.848619461  |
| 3.481650352  | 7.717025280  | 9.676206589  |
| 5.337137222  | 6.331508636  | 10.467162132 |
| 4.228183746  | 6.224106312  | 12.105720520 |
| 4.536033154  | 8.265563011  | 12.356711388 |

C<sub>2</sub>N-AgNi\*COOH

| C  | N  | Ag | Ni | O | H |
|----|----|----|----|---|---|
| 49 | 24 | 1  | 1  | 2 | 1 |

Cartesian

|              |             |             |
|--------------|-------------|-------------|
| -1.471986294 | 4.697452068 | 9.007056236 |
| -0.751417160 | 3.467150927 | 9.071477890 |
| 1.414841175  | 4.725495338 | 9.241524696 |
| 0.711531401  | 3.485927820 | 9.142829895 |
| -0.760066271 | 5.973060131 | 9.069120407 |
| 5.581075668  | 2.342983484 | 8.943533897 |
| 2.697234631  | 2.349857330 | 9.101106644 |
| 3.421859980  | 3.589366913 | 9.152189255 |
| 4.873752117  | 3.578702927 | 9.046745300 |
| 3.412263870  | 1.078774214 | 9.027845383 |
| 0.655284643  | 5.972425938 | 9.254484177 |
| 4.836376190  | 1.076281190 | 8.965278625 |
| 6.920766354  | 4.677190781 | 8.831988335 |
| 7.586258888  | 3.433228493 | 8.782938004 |
| 9.773457527  | 4.678934574 | 8.715366364 |
| 9.052951813  | 3.438747644 | 8.743103981 |
| 7.644476414  | 5.912405968 | 8.803152084 |
| 13.923610687 | 2.296494961 | 8.979840279 |
| 11.029153824 | 2.296250105 | 8.833301544 |
| 11.743828773 | 3.529793739 | 8.810550690 |
| 13.206511497 | 3.531912088 | 8.893331528 |
| 11.758758545 | 1.029201865 | 8.927927971 |
| 9.054451942  | 5.954715729 | 8.727516174 |

|              |              |              |
|--------------|--------------|--------------|
| 13.189751625 | 1.025512695  | 8.989613533  |
| -5.667654037 | 11.925671577 | 8.931132317  |
| -4.950371742 | 10.690052986 | 8.871767998  |
| -2.770942211 | 11.929620743 | 8.920601845  |
| -3.483512163 | 10.692257881 | 8.886834145  |
| -4.932055950 | 13.201336861 | 8.956098557  |
| 1.353227615  | 9.550105095  | 9.226404190  |
| -1.509089947 | 9.545263290  | 8.956476212  |
| -0.794990063 | 10.784441948 | 8.987598419  |
| 0.669706345  | 10.787570000 | 9.077418327  |
| -0.789144039 | 8.271802902  | 9.037116051  |
| -3.501071930 | 13.198786736 | 8.929457664  |
| 0.616605759  | 8.298866272  | 9.230130196  |
| 2.675670147  | 11.899429321 | 9.109565735  |
| 3.377985477  | 10.656678200 | 9.228006363  |
| 5.559819698  | 11.871560097 | 9.122112274  |
| 4.846135139  | 10.632526398 | 9.188783646  |
| 3.417583942  | 13.157212257 | 9.054324150  |
| 9.720804214  | 9.525348663  | 8.860931396  |
| 6.839843273  | 9.485819817  | 9.054882050  |
| 7.542745113  | 10.735691071 | 9.031608582  |
| 9.004970551  | 10.755692482 | 8.954604149  |
| 7.580837250  | 8.241757393  | 8.947817802  |
| 4.843850613  | 13.148220062 | 9.085121155  |
| 9.001837730  | 8.243846893  | 8.834039688  |
| 5.441977024  | 6.934892654  | 11.607677460 |
| 6.919120789  | 2.275167465  | 8.835371971  |
| 5.562137604  | 4.758870125  | 9.018270493  |
| -1.463827372 | 7.115283966  | 8.990621567  |
| 2.763732195  | 4.759100437  | 9.259037971  |
| 1.362927675  | 2.321684599  | 9.098928452  |
| 1.297245979  | 7.145964146  | 9.402534485  |
| 15.260938644 | 2.285370111  | 9.059165955  |
| 13.833455086 | 4.710623741  | 8.908289909  |
| 6.911854267  | 7.055566788  | 8.950626373  |
| 11.108564377 | 4.703590870  | 8.742239952  |
| 9.691742897  | 2.267486572  | 8.792172432  |
| 9.724193573  | 7.114058971  | 8.736246109  |
| 2.696805000  | 9.508127213  | 9.329022408  |
| 1.334489346  | 11.944059372 | 9.045215607  |
| -5.613994598 | 14.348994255 | 9.013535500  |
| -1.432932854 | 11.956769943 | 8.963711739  |
| -2.845044613 | 9.518733978  | 8.897472382  |
| -2.799590111 | 14.338719368 | 8.924021721  |

|              |              |              |
|--------------|--------------|--------------|
| 11.057899475 | 9.512955666  | 8.825076103  |
| 9.635149002  | 11.936840057 | 8.977121353  |
| 2.734680176  | 14.305186272 | 8.968283653  |
| 6.896107197  | 11.898753166 | 9.064943314  |
| 5.495726109  | 9.455817223  | 9.158885956  |
| 5.550881386  | 14.285054207 | 9.059147835  |
| 3.044434071  | 7.430918694  | 10.656827927 |
| 5.289844513  | 6.494866371  | 9.801395416  |
| 6.629022121  | 6.734989166  | 12.230135918 |
| 4.489164829  | 7.381907940  | 12.315941811 |
| 6.510482788  | 6.978686333  | 13.180572510 |

C<sub>2</sub>N-AgCo\*CO

| C  | N  | Ag | Co | O |
|----|----|----|----|---|
| 49 | 24 | 1  | 1  | 1 |

Cartesian

|              |              |             |
|--------------|--------------|-------------|
| -1.531915188 | 4.746289730  | 8.933021545 |
| -0.805896521 | 3.515685558  | 8.985294342 |
| 1.338479757  | 4.791437626  | 9.185165405 |
| 0.655029774  | 3.544131994  | 9.058446884 |
| -0.834089279 | 6.029909611  | 9.025308609 |
| 5.527460575  | 2.451062441  | 8.969561577 |
| 2.656399012  | 2.435254335  | 9.028007507 |
| 3.365698814  | 3.685168028  | 9.090126038 |
| 4.823804855  | 3.697517872  | 9.035118103 |
| 3.374006987  | 1.169877768  | 8.972352028 |
| 0.570254803  | 6.021220207  | 9.252791405 |
| 4.797445297  | 1.176275969  | 8.953506470 |
| 6.885271072  | 4.778324127  | 8.950086594 |
| 7.543624878  | 3.523092747  | 8.900712013 |
| 9.742365837  | 4.735438347  | 8.794026375 |
| 9.011068344  | 3.505382061  | 8.846712112 |
| 7.635464191  | 5.985424042  | 8.927082062 |
| 13.877285004 | 2.328860998  | 8.913906097 |
| 10.975040436 | 2.333141088  | 8.857332230 |
| 11.697427750 | 3.561799288  | 8.808389664 |
| 13.157981873 | 3.562419176  | 8.844264030 |
| 11.706859589 | 1.060126901  | 8.918010712 |
| 9.041204453  | 6.021695614  | 8.814258575 |
| 13.143101692 | 1.056019902  | 8.938890457 |
| -5.692458153 | 12.015579224 | 8.863811493 |
| -4.969708920 | 10.784211159 | 8.807273865 |
| -2.790213585 | 12.021847725 | 8.883197784 |
| -3.506660223 | 10.786934853 | 8.830169678 |

|              |              |              |
|--------------|--------------|--------------|
| -4.958066463 | 13.291547775 | 8.894627571  |
| 1.307592869  | 9.584215164  | 9.230706215  |
| -1.550532341 | 9.613497734  | 8.933238029  |
| -0.828278542 | 10.848064423 | 8.982162476  |
| 0.633364201  | 10.829359055 | 9.080675125  |
| -0.848773479 | 8.332053185  | 9.032382011  |
| -3.521924019 | 13.293665886 | 8.892864227  |
| 0.549171925  | 8.351277351  | 9.271530151  |
| 2.646475315  | 11.923798561 | 9.078246117  |
| 3.344731331  | 10.670526505 | 9.160056114  |
| 5.518511772  | 11.893737793 | 9.051480293  |
| 4.810925961  | 10.643564224 | 9.100961685  |
| 3.377207279  | 13.183886528 | 9.023741722  |
| 9.714944839  | 9.603194237  | 8.816705704  |
| 6.844225407  | 9.545782089  | 8.995697975  |
| 7.523158073  | 10.801950455 | 8.968157768  |
| 8.986613274  | 10.831002235 | 8.894592285  |
| 7.603840351  | 8.330598831  | 8.944883347  |
| 4.800329208  | 13.173683167 | 9.027000427  |
| 9.014450073  | 8.317110062  | 8.827055931  |
| 4.954906940  | 7.054456711  | 11.271383286 |
| 6.870331287  | 2.376041412  | 8.913545609  |
| 5.514761925  | 4.882022381  | 9.031913757  |
| -1.534197807 | 7.177422047  | 8.960273743  |
| 2.690566063  | 4.844641685  | 9.182232857  |
| 1.319596171  | 2.391806364  | 8.999279976  |
| 1.205493927  | 7.190031528  | 9.494729996  |
| 15.216217995 | 2.328846693  | 8.972153664  |
| 13.774224281 | 4.746635437  | 8.847990036  |
| 6.925396442  | 7.150071144  | 9.052794456  |
| 11.075342178 | 4.743320942  | 8.767979622  |
| 9.635866165  | 2.323457003  | 8.868995667  |
| 9.728900909  | 7.173603535  | 8.780255318  |
| 2.658158302  | 9.522726059  | 9.266147614  |
| 1.306683540  | 11.977722168 | 9.031067848  |
| 2.674339056  | 0.024642050  | 8.937917709  |
| -1.451055050 | 12.030032158 | 8.948304176  |
| -2.884074688 | 9.605557442  | 8.844623566  |
| 5.491055489  | 0.030017188  | 8.917181969  |
| 11.050251007 | 9.601536751  | 8.773830414  |
| 9.608432770  | 12.016976357 | 8.907624245  |
| 2.688861847  | 14.333502769 | 8.965295792  |
| 6.855763435  | 11.951164246 | 8.993070602  |
| 5.486366272  | 9.465746880  | 9.058427811  |

|             |              |              |
|-------------|--------------|--------------|
| 5.505071640 | 14.313529968 | 8.988821983  |
| 2.929791451 | 7.254965782  | 10.763837814 |
| 5.078618526 | 6.926332951  | 9.525258064  |
| 5.507169247 | 7.007262707  | 12.473801613 |

C<sub>2</sub>N-AgCo\*CHO

| C  | N  | Ag | Co | O | H |
|----|----|----|----|---|---|
| 49 | 24 | 1  | 1  | 1 | 1 |

Cartesian

|              |              |             |
|--------------|--------------|-------------|
| -1.477935076 | 4.701357365  | 9.009107590 |
| -0.753771663 | 3.472266674  | 9.065987587 |
| 1.403975010  | 4.739848137  | 9.253026009 |
| 0.707645655  | 3.497268915  | 9.145026207 |
| -0.771639347 | 5.979991436  | 9.077633858 |
| 5.573704243  | 2.368461132  | 9.021492004 |
| 2.696310759  | 2.369412422  | 9.120599747 |
| 3.417174816  | 3.610449791  | 9.179280281 |
| 4.867645264  | 3.607524157  | 9.099827766 |
| 3.410482883  | 1.098170757  | 9.053135872 |
| 0.639768124  | 5.978117943  | 9.277488708 |
| 4.834578514  | 1.099510908  | 9.018323898 |
| 6.924833775  | 4.699195862  | 8.939321518 |
| 7.585975647  | 3.450146437  | 8.912322044 |
| 9.776777267  | 4.684021473  | 8.813987732 |
| 9.052700996  | 3.448748589  | 8.864658356 |
| 7.651698112  | 5.921196461  | 8.869823456 |
| 13.924118042 | 2.292560816  | 8.982071877 |
| 11.025094032 | 2.296538115  | 8.901918411 |
| 11.742647171 | 3.527113199  | 8.866169930 |
| 13.204339981 | 3.528150797  | 8.916299820 |
| 11.756088257 | 1.025844216  | 8.963208199 |
| 9.061515808  | 5.964730740  | 8.804051399 |
| 13.189660072 | 1.020339370  | 8.994329453 |
| -5.667995453 | 11.944592476 | 8.924435616 |
| -4.949040413 | 10.709391594 | 8.874072075 |
| -2.769304276 | 11.949031830 | 8.938008308 |
| -3.483288288 | 10.712244987 | 8.896986008 |
| -4.932913780 | 13.219855309 | 8.961948395 |
| 1.345565319  | 9.551272392  | 9.254267693 |
| -1.514323235 | 9.556692123  | 8.973629951 |
| -0.797310829 | 10.794198036 | 9.008711815 |
| 0.666544437  | 10.791056633 | 9.099989891 |
| -0.799427509 | 8.280535698  | 9.058391571 |
| -3.499541283 | 13.220085144 | 8.954225540 |

|              |              |              |
|--------------|--------------|--------------|
| 0.603302002  | 8.308650970  | 9.267155647  |
| 2.676469803  | 11.894068718 | 9.117414474  |
| 3.376155853  | 10.647570610 | 9.228258133  |
| 5.554362297  | 11.859915733 | 9.099450111  |
| 4.841726303  | 10.618403435 | 9.168246269  |
| 3.415462017  | 13.151635170 | 9.063179970  |
| 9.726919174  | 9.536776543  | 8.857511520  |
| 6.847913742  | 9.489942551  | 9.018090248  |
| 7.543867588  | 10.740980148 | 8.999298096  |
| 9.007330894  | 10.766674042 | 8.932968140  |
| 7.593840599  | 8.256355286  | 8.917920113  |
| 4.840215206  | 13.140453339 | 9.074357986  |
| 9.013675690  | 8.255273819  | 8.837369919  |
| 5.520403385  | 6.813296318  | 11.251205444 |
| 6.916982174  | 2.296999454  | 8.952281952  |
| 5.558450699  | 4.790155411  | 9.073512077  |
| -1.474934340 | 7.123800755  | 8.998794556  |
| 2.755312681  | 4.782012939  | 9.270648003  |
| 1.361837506  | 2.335187435  | 9.102977753  |
| 1.280298233  | 7.152607441  | 9.448001862  |
| 15.262779236 | 2.287488461  | 9.047790527  |
| 13.827073097 | 4.709629059  | 8.926074028  |
| 6.913185120  | 7.075280190  | 8.918622017  |
| 11.110302925 | 4.704671860  | 8.812115669  |
| 9.686817169  | 2.273250818  | 8.898570061  |
| 9.737504959  | 7.118785858  | 8.774873734  |
| 2.692004204  | 9.500937462  | 9.341729164  |
| 1.334780693  | 11.943929672 | 9.060750008  |
| -5.615392685 | 14.368996620 | 9.017117500  |
| -1.430686951 | 11.969537735 | 8.984069824  |
| -2.849554539 | 9.536026955  | 8.908326149  |
| -2.798625469 | 14.361084938 | 8.975250244  |
| 11.064846039 | 9.529196739  | 8.831753731  |
| 9.632261276  | 11.950399399 | 8.955827713  |
| 2.732133865  | 14.302419662 | 9.001638412  |
| 6.890033245  | 11.898954391 | 9.037998199  |
| 5.499762535  | 9.439231873  | 9.127313614  |
| 5.549126625  | 14.276191711 | 9.043902397  |
| 2.993002892  | 7.361718655  | 10.704545975 |
| 5.160616875  | 6.668917179  | 9.495306015  |
| 4.635723114  | 7.164265633  | 12.080087662 |
| 6.532915115  | 6.581200123  | 11.665872574 |

C<sub>2</sub>N-AgCo\*COOH



| C            | N  | Ag | Co           | O | H           |
|--------------|----|----|--------------|---|-------------|
| 49           | 24 | 1  | 1            | 2 | 1           |
| Cartesian    |    |    |              |   |             |
| -1.507138610 |    |    | 4.745079041  |   | 8.823293686 |
| -0.788541317 |    |    | 3.514590502  |   | 8.908074379 |
| 1.375637054  |    |    | 4.775125027  |   | 9.062154770 |
| 0.669764519  |    |    | 3.532474041  |   | 8.999892235 |
| -0.791649818 |    |    | 6.019635201  |   | 8.809829712 |
| 5.538153172  |    |    | 2.379427671  |   | 9.035172462 |
| 2.650684357  |    |    | 2.389587164  |   | 9.077327728 |
| 3.372422457  |    |    | 3.627554893  |   | 9.169614792 |
| 4.827501297  |    |    | 3.610017300  |   | 9.191898346 |
| 3.366911888  |    |    | 1.116169572  |   | 9.022734642 |
| 0.628277302  |    |    | 6.029578209  |   | 8.963964462 |
| 4.791172981  |    |    | 1.113935947  |   | 8.965403557 |
| 6.888816833  |    |    | 4.710883141  |   | 9.142560959 |
| 7.552453995  |    |    | 3.472208977  |   | 8.998685837 |
| 9.730526924  |    |    | 4.727440834  |   | 8.920494080 |
| 9.013439178  |    |    | 3.485538721  |   | 8.919504166 |
| 7.606986523  |    |    | 5.953908443  |   | 9.147707939 |
| 13.884264946 |    |    | 2.347090483  |   | 8.851931572 |
| 10.989341736 |    |    | 2.348574638  |   | 8.828244209 |
| 11.702293396 |    |    | 3.583285570  |   | 8.826264381 |
| 13.165510178 |    |    | 3.584020376  |   | 8.809955597 |
| 11.719139099 |    |    | 1.080186367  |   | 8.815985680 |
| 9.011387825  |    |    | 5.999244213  |   | 9.005561829 |
| 13.149732590 |    |    | 1.076007366  |   | 8.856395721 |
| -5.713189602 |    |    | 11.964277267 |   | 8.928773880 |
| -4.999841690 |    |    | 10.727519989 |   | 8.835534096 |
| -2.822584152 |    |    | 11.969493866 |   | 8.730144501 |
| -3.537666559 |    |    | 10.731698990 |   | 8.731962204 |
| -4.976825714 |    |    | 13.239423752 |   | 8.923698425 |
| 1.302899837  |    |    | 9.598251343  |   | 8.852742195 |
| -1.559176683 |    |    | 9.587602615  |   | 8.658018112 |
| -0.842555046 |    |    | 10.828034401 |   | 8.659440041 |
| 0.623829365  |    |    | 10.836248398 |   | 8.714375496 |
| -0.832424641 |    |    | 8.313593864  |   | 8.707229614 |
| -3.549353123 |    |    | 13.239151001 |   | 8.828639984 |
| 0.579806328  |    |    | 8.344676971  |   | 8.845361710 |
| 2.629968643  |    |    | 11.949334145 |   | 8.826984406 |
| 3.331959724  |    |    | 10.715991974 |   | 8.987489700 |
| 5.515099049  |    |    | 11.928553581 |   | 9.022158623 |
| 4.791680336  |    |    | 10.696148872 |   | 9.089567184 |
| 3.375924587  |    |    | 13.206481934 |   | 8.838215828 |

|              |              |              |
|--------------|--------------|--------------|
| 9.671150208  | 9.568984032  | 8.983133316  |
| 6.785155296  | 9.541055679  | 9.195011139  |
| 7.496302128  | 10.785349846 | 9.099845886  |
| 8.957212448  | 10.801489830 | 9.040662766  |
| 7.528571129  | 8.290320396  | 9.211571693  |
| 4.800961018  | 13.199680328 | 8.924094200  |
| 8.949272156  | 8.289902687  | 9.053442001  |
| 3.907223225  | 7.157492638  | 12.030407906 |
| 6.878336430  | 2.316554308  | 8.967257500  |
| 5.530464172  | 4.774447441  | 9.320075989  |
| -1.502640009 | 7.156425953  | 8.699148178  |
| 2.715235710  | 4.802778721  | 9.172836304  |
| 1.318631768  | 2.365319967  | 9.014507294  |
| 1.283774376  | 7.203188419  | 9.010296822  |
| 15.220552444 | 2.333270788  | 8.907137871  |
| 13.795515060 | 4.760627747  | 8.780147552  |
| 6.872699738  | 7.097760677  | 9.334170341  |
| 11.064483643 | 4.757284641  | 8.866260529  |
| 9.653728485  | 2.315084457  | 8.867214203  |
| 9.674506187  | 7.161296844  | 8.981333733  |
| 2.642175674  | 9.561129570  | 9.033209801  |
| 1.290152073  | 11.996095657 | 8.712809563  |
| -5.657773972 | 14.386921883 | 9.010332108  |
| -1.485964775 | 11.999078751 | 8.679132462  |
| -2.894964457 | 9.559286118  | 8.679528236  |
| -2.847179890 | 14.378578186 | 8.857403755  |
| 11.003860474 | 9.550004959  | 8.870111465  |
| 9.592683792  | 11.981282234 | 9.021924019  |
| 2.694419861  | 14.356819153 | 8.790750504  |
| 6.850555420  | 11.950731277 | 9.035063744  |
| 5.438368320  | 9.522307396  | 9.202230453  |
| 5.508823395  | 14.336024284 | 8.917200089  |
| 3.184542179  | 7.685106277  | 10.166255951 |
| 5.378734589  | 6.409642220  | 10.308221817 |
| 4.995329857  | 6.530128956  | 12.224951744 |
| 3.181885242  | 7.477824211  | 13.112261772 |
| 3.659126759  | 7.143687248  | 13.913333893 |

C<sub>2</sub>N-AgFe\*CO

| C  | N  | Ag | Fe | O |
|----|----|----|----|---|
| 49 | 24 | 1  | 1  | 1 |

Cartesian

|              |             |             |
|--------------|-------------|-------------|
| -1.505807996 | 4.767069340 | 9.005543709 |
| -0.781694770 | 3.539218187 | 9.066761971 |

|              |              |             |
|--------------|--------------|-------------|
| 1.386784077  | 4.811526299  | 9.212526321 |
| 0.682584763  | 3.565949678  | 9.134963989 |
| -0.798680544 | 6.043772697  | 9.065429688 |
| 5.544741631  | 2.404675007  | 8.918352127 |
| 2.662714005  | 2.422875643  | 9.079919815 |
| 3.390142918  | 3.660180330  | 9.113021851 |
| 4.839190006  | 3.639775038  | 9.022158623 |
| 3.372135639  | 1.149976730  | 9.000198364 |
| 0.619474411  | 6.052318096  | 9.242730141 |
| 4.795964718  | 1.143737078  | 8.924741745 |
| 6.896421432  | 4.740193844  | 8.893692017 |
| 7.556297302  | 3.494631767  | 8.821224213 |
| 9.742306709  | 4.740842342  | 8.762328148 |
| 9.023056030  | 3.501563311  | 8.778743744 |
| 7.614215851  | 5.971647739  | 8.870130539 |
| 13.896936417 | 2.357970476  | 8.966556549 |
| 10.999434471 | 2.359368324  | 8.828747749 |
| 11.713551521 | 3.592205763  | 8.817947388 |
| 13.176490784 | 3.594194412  | 8.891280174 |
| 11.730353355 | 1.090216160  | 8.900261879 |
| 9.021836281  | 6.018698692  | 8.783946037 |
| 13.162519455 | 1.085215688  | 8.964845657 |
| -5.716775894 | 11.996686935 | 8.897274017 |
| -4.995841026 | 10.761169434 | 8.836739540 |
| -2.818516731 | 11.999194145 | 8.855622292 |
| -3.532259703 | 10.763575554 | 8.839008331 |
| -4.980728626 | 13.272092819 | 8.917253494 |
| 1.289254665  | 9.625285149  | 9.206261635 |
| -1.560841322 | 9.615357399  | 8.917811394 |
| -0.843487740 | 10.855183601 | 8.927802086 |
| 0.618196964  | 10.861048698 | 9.025415421 |
| -0.843623877 | 8.342990875  | 9.019889832 |
| -3.548671722 | 13.267597198 | 8.872812271 |
| 0.558022976  | 8.377965927  | 9.218646049 |
| 2.632796764  | 11.963686943 | 9.057275772 |
| 3.332833290  | 10.722836494 | 9.200537682 |
| 5.514708519  | 11.923409462 | 9.086363792 |
| 4.794068813  | 10.684980392 | 9.154205322 |
| 3.379335880  | 13.217174530 | 9.002843857 |
| 9.680518150  | 9.590513229  | 8.853750229 |
| 6.800314426  | 9.543909073  | 9.034938812 |
| 7.500519753  | 10.794240952 | 9.007920265 |
| 8.959756851  | 10.819070816 | 8.935452461 |
| 7.548837662  | 8.306892395  | 8.949510574 |

|              |              |              |
|--------------|--------------|--------------|
| 4.803997040  | 13.205199242 | 9.045180321  |
| 8.968406677  | 8.309069633  | 8.845002174  |
| 4.989189625  | 6.866254807  | 11.311074257 |
| 6.886713505  | 2.338040829  | 8.834400177  |
| 5.533124924  | 4.814855099  | 9.032615662  |
| -1.510869503 | 7.182264328  | 8.978597641  |
| 2.741533041  | 4.841413498  | 9.192438126  |
| 1.328598142  | 2.400135756  | 9.087354660  |
| 1.253365040  | 7.231505394  | 9.392220497  |
| 15.235036850 | 2.354238033  | 9.046907425  |
| 13.798633575 | 4.774303913  | 8.910449982  |
| 6.877216816  | 7.121725559  | 8.982162476  |
| 11.076405525 | 4.767184734  | 8.772822380  |
| 9.662331581  | 2.329639196  | 8.800109863  |
| 9.693082809  | 7.176038742  | 8.772678375  |
| 2.634853363  | 9.581016541  | 9.334061623  |
| 1.290766239  | 12.015435219 | 8.983566284  |
| 2.662192345  | 0.011672550  | 8.985834122  |
| -1.480574131 | 12.028101921 | 8.886653900  |
| -2.895131588 | 9.588164330  | 8.860068321  |
| -2.844127655 | 14.404387474 | 8.866673470  |
| 11.016557693 | 9.581217766  | 8.806409836  |
| 9.586843491  | 12.003993034 | 8.948393822  |
| 2.702172279  | 14.369961739 | 8.921429634  |
| 6.847975254  | 11.955948830 | 9.028638840  |
| 5.452063084  | 9.501556396  | 9.119771957  |
| 5.516528130  | 14.338907242 | 9.029501915  |
| 3.085770130  | 7.661357403  | 10.592531204 |
| 5.043905258  | 6.676150799  | 9.489636421  |
| 5.459046364  | 6.758839130  | 12.391830444 |

C<sub>2</sub>N-AgFe\*CHO

| C  | N  | Ag | Fe | O | H |
|----|----|----|----|---|---|
| 49 | 24 | 1  | 1  | 1 | 1 |

Cartesian

|              |             |             |
|--------------|-------------|-------------|
| -1.519237041 | 4.801309109 | 8.976059914 |
| -0.815889716 | 3.563514233 | 8.892738342 |
| 1.364247084  | 4.772603035 | 9.006480217 |
| 0.652076483  | 3.541811943 | 8.884457588 |
| -0.770401478 | 6.051511288 | 9.067535400 |
| 5.522820473  | 2.351831675 | 8.736515999 |
| 2.606423855  | 2.352091074 | 8.769348145 |
| 3.349512100  | 3.548642635 | 8.852489471 |
| 4.780562401  | 3.548282146 | 8.828370094 |

|              |              |              |
|--------------|--------------|--------------|
| 3.347610474  | 1.089423656  | 8.725139618  |
| 0.662704706  | 6.035659313  | 9.116711617  |
| 4.782122135  | 1.088948131  | 8.714141846  |
| 6.767363071  | 4.772905827  | 8.931456566  |
| 7.478572369  | 3.542503834  | 8.813754082  |
| 9.648906708  | 4.801539898  | 8.904077530  |
| 8.945871353  | 3.563571930  | 8.824248314  |
| 7.467220306  | 6.036523819  | 9.033929825  |
| 13.830848694 | 2.444044590  | 8.838576317  |
| 10.938738823 | 2.444059134  | 8.809218407  |
| 11.648321152 | 3.686911821  | 8.867609978  |
| 13.121403694 | 3.686724424  | 8.887914658  |
| 11.671013832 | 1.177832365  | 8.813555717  |
| 8.899734497  | 6.053024292  | 8.983854294  |
| 13.098187447 | 1.178797841  | 8.823348045  |
| -5.702648163 | 11.948123932 | 8.867358208  |
| -4.991737843 | 10.705990791 | 8.943462372  |
| -2.807350636 | 11.947200775 | 8.873981476  |
| -3.519354343 | 10.705861092 | 8.953037262  |
| -4.968347549 | 13.215402603 | 8.788067818  |
| 1.364457130  | 9.627202988  | 9.249300003  |
| -1.517752171 | 9.592977524  | 9.070451736  |
| -0.815449238 | 10.831291199 | 9.006749153  |
| 0.646101475  | 10.851912498 | 9.067500114  |
| -0.762680054 | 8.338019371  | 9.139266014  |
| -3.540841103 | 13.214898109 | 8.785871506  |
| 0.668927670  | 8.346637726  | 9.230832100  |
| 2.608726025  | 12.046965599 | 9.006389618  |
| 3.342821121  | 10.852027893 | 9.199151993  |
| 5.520195961  | 12.047253609 | 8.995284081  |
| 4.787532806  | 10.849563599 | 9.183635712  |
| 3.347144604  | 13.305957794 | 8.899109840  |
| 9.644784927  | 9.593409538  | 9.026063919  |
| 6.761733055  | 9.626640320  | 9.198036194  |
| 7.482115269  | 10.852892876 | 9.034541130  |
| 8.943267822  | 10.832760811 | 8.977536201  |
| 7.458242416  | 8.345268250  | 9.163601875  |
| 4.780907154  | 13.306894302 | 8.899973869  |
| 8.889518738  | 8.338034630  | 9.072018623  |
| 4.206536293  | 6.864770889  | 11.980691910 |
| 6.864407539  | 2.352609873  | 8.726165771  |
| 5.404518127  | 4.761853218  | 8.948466301  |
| -1.453562737 | 7.197366714  | 9.084311485  |
| 2.728689671  | 4.761405945  | 9.009305954  |

|              |              |              |
|--------------|--------------|--------------|
| 1.264744639  | 2.352047682  | 8.783027649  |
| 1.366773605  | 7.182898521  | 9.229320526  |
| 15.168219566 | 2.400942802  | 8.830349922  |
| 13.779296875 | 4.847884178  | 8.962577820  |
| 6.760896206  | 7.181947231  | 9.156401634  |
| 10.989835739 | 4.849137783  | 8.915904045  |
| 9.601926804  | 2.400798559  | 8.778059959  |
| 9.582280159  | 7.198462009  | 9.006174088  |
| 2.708140373  | 9.671702385  | 9.386622429  |
| 1.269866467  | 12.039413452 | 8.975267410  |
| -5.663780212 | 14.356286049 | 8.748900414  |
| -1.472869396 | 11.993084908 | 8.901665688  |
| -2.856900692 | 9.544370651  | 9.044028282  |
| -2.846306324 | 14.356083870 | 8.735777855  |
| 10.983926773 | 9.543952942  | 9.012725830  |
| 9.602375031  | 11.994698524 | 8.888363838  |
| 10.973917007 | 0.035810232  | 8.841959953  |
| 6.857816219  | 12.040725708 | 8.953703880  |
| 5.420251846  | 9.664698601  | 9.334061623  |
| 13.794418335 | 0.036300190  | 8.852561951  |
| 4.036365986  | 8.377807617  | 10.625021935 |
| 4.080427170  | 6.090232372  | 9.554597855  |
| 4.225111008  | 5.670986176  | 11.595563889 |
| 4.306511402  | 7.010187626  | 13.086108208 |

C<sub>2</sub>N-AgFe\*COOH

| C  | N  | Ag | Fe | O | H |
|----|----|----|----|---|---|
| 49 | 24 | 1  | 1  | 2 | 1 |

Cartesian

|              |             |             |
|--------------|-------------|-------------|
| -1.481856108 | 4.807606220 | 9.020682335 |
| -0.756744742 | 3.587421417 | 9.010223389 |
| 1.450538635  | 4.843272686 | 9.087677956 |
| 0.716769695  | 3.606429100 | 9.025289536 |
| -0.750767231 | 6.067881584 | 9.075635910 |
| 5.546108246  | 2.330028296 | 8.714573860 |
| 2.647489548  | 2.396590710 | 8.908433914 |
| 3.405561209  | 3.602898359 | 8.917451859 |
| 4.821912289  | 3.543209791 | 8.796006203 |
| 3.348774433  | 1.110578299 | 8.843292236 |
| 0.689026594  | 6.086903572 | 9.144180298 |
| 4.776713848  | 1.083356738 | 8.749601364 |
| 6.853457451  | 4.707539558 | 8.800127983 |
| 7.537154198  | 3.472050428 | 8.716841698 |
| 9.692296028  | 4.764979839 | 8.848728180 |

|              |              |              |
|--------------|--------------|--------------|
| 9.001075745  | 3.514532804  | 8.749998093  |
| 7.509286880  | 5.960407734  | 8.927477837  |
| 13.902783394 | 2.423120499  | 8.925264359  |
| 11.003642082 | 2.421189547  | 8.782559395  |
| 11.702309608 | 3.663437128  | 8.855567932  |
| 13.175974846 | 3.663854837  | 8.914949417  |
| 11.736566544 | 1.157816052  | 8.813250542  |
| 8.931250572  | 6.017574310  | 8.923769951  |
| 13.164714813 | 1.147498131  | 8.893890381  |
| -5.764505863 | 11.951912880 | 8.930141449  |
| -5.052148342 | 10.702893257 | 8.945963860  |
| -2.873076916 | 11.945903778 | 8.834615707  |
| -3.579256773 | 10.704852104 | 8.915831566  |
| -5.026220322 | 13.228688240 | 8.868096352  |
| 1.286607265  | 9.669814110  | 9.185850143  |
| -1.571033001 | 9.604361534  | 8.976311684  |
| -0.870385647 | 10.850356102 | 8.899991989  |
| 0.594733715  | 10.890590668 | 8.963153839  |
| -0.816143990 | 8.355571747  | 9.062603951  |
| -3.600053310 | 13.212203026 | 8.799066544  |
| 0.602068901  | 8.392030716  | 9.172620773  |
| 2.591553211  | 12.039443016 | 8.956259727  |
| 3.301455498  | 10.828308105 | 9.182070732  |
| 5.490870953  | 11.988443375 | 9.050742149  |
| 4.750853062  | 10.778188705 | 9.167634010  |
| 3.360364914  | 13.286489487 | 8.884457588  |
| 9.593576431  | 9.563449860  | 9.029303551  |
| 6.706324100  | 9.553838730  | 9.148823738  |
| 7.440425873  | 10.792325020 | 9.076319695  |
| 8.897035599  | 10.800351143 | 9.030617714  |
| 7.405837536  | 8.276342392  | 9.100782394  |
| 4.789119720  | 13.267971992 | 8.958600044  |
| 8.843160629  | 8.294081688  | 9.045486450  |
| 4.205638885  | 6.835431099  | 11.990807533 |
| 6.890118122  | 2.295169353  | 8.660952568  |
| 5.486411095  | 4.739156246  | 8.810837746  |
| -1.471208811 | 7.193144321  | 9.038124084  |
| 2.827535152  | 4.842724800  | 9.049464226  |
| 1.318231702  | 2.409617901  | 8.966159821  |
| 1.337602139  | 7.262847900  | 9.217223167  |
| 15.242806435 | 2.407355309  | 8.968319893  |
| 13.817635536 | 4.834337711  | 8.967167854  |
| 6.716329098  | 7.079387188  | 9.061650276  |
| 11.031210899 | 4.822463989  | 8.887248039  |

|              |              |              |
|--------------|--------------|--------------|
| 9.669893265  | 2.361414433  | 8.717958450  |
| 9.583105087  | 7.175794125  | 8.989937782  |
| 2.619517326  | 9.684412003  | 9.389754295  |
| 1.248218536  | 12.063854218 | 8.887193680  |
| -5.692184448 | 14.390525818 | 8.888580322  |
| -1.537364483 | 12.002941132 | 8.819747925  |
| -2.909831524 | 9.546935081  | 8.977157593  |
| -2.880450249 | 14.336832047 | 8.728487968  |
| 10.935523987 | 9.532107353  | 8.991917610  |
| 9.540267944  | 11.977218628 | 8.976635933  |
| 11.017588615 | 0.030752126  | 8.800020218  |
| 6.824646473  | 11.976901054 | 9.027954102  |
| 5.362580776  | 9.576592445  | 9.218699455  |
| 5.510319710  | 14.397672653 | 8.956602097  |
| 3.425744057  | 8.259957314  | 10.747187614 |
| 4.621933937  | 6.303148270  | 9.411785126  |
| 4.778374672  | 5.827369213  | 11.499713898 |
| 4.120756626  | 6.931491852  | 13.326516151 |
| 4.554622173  | 6.134271145  | 13.721615791 |

C<sub>2</sub>N-AgMn\*CO

| C  | N  | Ag | Mn | O |
|----|----|----|----|---|
| 49 | 24 | 1  | 1  | 1 |

Cartesian

|              |             |             |
|--------------|-------------|-------------|
| -1.508902431 | 4.756261349 | 8.965025902 |
| -0.781627893 | 3.530658245 | 9.016883850 |
| 1.384563446  | 4.799406528 | 9.179333687 |
| 0.680854559  | 3.557533979 | 9.084185600 |
| -0.800086260 | 6.034535408 | 9.035964012 |
| 5.544434071  | 2.399732351 | 8.950446129 |
| 2.661224842  | 2.416549444 | 9.044748306 |
| 3.388046503  | 3.651332140 | 9.090791702 |
| 4.834173203  | 3.633247137 | 9.020286560 |
| 3.374648571  | 1.142108560 | 8.983440399 |
| 0.618335009  | 6.038123608 | 9.218394279 |
| 4.799234867  | 1.136805534 | 8.951490402 |
| 6.889465332  | 4.740481853 | 8.918208122 |
| 7.555390358  | 3.494530916 | 8.872451782 |
| 9.739460945  | 4.736922264 | 8.789633751 |
| 9.018447876  | 3.498133659 | 8.830781937 |
| 7.611844063  | 5.971316814 | 8.881595612 |
| 13.895471573 | 2.349324226 | 8.934173584 |
| 10.993917465 | 2.352062225 | 8.860409737 |
| 11.709715843 | 3.584582567 | 8.824535370 |



|              |              |              |
|--------------|--------------|--------------|
| 13.172198296 | 3.584568024  | 8.869985580  |
| 11.725094795 | 1.083558440  | 8.921015739  |
| 9.020930290  | 6.011939526  | 8.796797752  |
| 13.158400536 | 1.074364543  | 8.947314262  |
| -5.710960388 | 11.989755630 | 8.875512123  |
| -4.989992142 | 10.755419731 | 8.828495979  |
| -2.811569214 | 11.992522240 | 8.895708084  |
| -3.526293993 | 10.756528854 | 8.852364540  |
| -4.974638939 | 13.264887810 | 8.909207344  |
| 1.300652981  | 9.611797333  | 9.214325905  |
| -1.556398153 | 9.606047630  | 8.936982155  |
| -0.838020802 | 10.845168114 | 8.974205971  |
| 0.621824741  | 10.848856926 | 9.066473961  |
| -0.840312719 | 8.333394051  | 9.021563530  |
| -3.542739391 | 13.261414528 | 8.904780388  |
| 0.563340664  | 8.361407280  | 9.220319748  |
| 2.633455276  | 11.953700066 | 9.083789825  |
| 3.339838505  | 10.709693909 | 9.189539909  |
| 5.514584064  | 11.912903786 | 9.050166130  |
| 4.798686028  | 10.674244881 | 9.122220039  |
| 3.377954483  | 13.210891724 | 9.023435593  |
| 9.687091827  | 9.585295677  | 8.822231293  |
| 6.807943821  | 9.540147781  | 8.987075806  |
| 7.502284050  | 10.789832115 | 8.954423904  |
| 8.964491844  | 10.813811302 | 8.888436317  |
| 7.556642056  | 8.308794975  | 8.912879944  |
| 4.802508831  | 13.194030762 | 9.027071953  |
| 8.974480629  | 8.304745674  | 8.818254471  |
| 4.971646786  | 7.073219299  | 11.421287537 |
| 6.886248112  | 2.335273743  | 8.890487671  |
| 5.523423672  | 4.813529015  | 9.020969391  |
| -1.508173227 | 7.172349930  | 8.965025902  |
| 2.738712549  | 4.836528301  | 9.171720505  |
| 1.328448534  | 2.389126062  | 9.034020424  |
| 1.254130840  | 7.214731216  | 9.385182381  |
| 15.232768059 | 2.344366789  | 8.997444153  |
| 13.797262192 | 4.765556335  | 8.880479813  |
| 6.881093979  | 7.125529766  | 8.964593887  |
| 11.074050903 | 4.760138035  | 8.779985428  |
| 9.656757355  | 2.324509144  | 8.856900215  |
| 9.696045876  | 7.169698238  | 8.766683578  |
| 2.645869255  | 9.561706543  | 9.306593895  |
| 1.295052528  | 12.004929543 | 9.033534050  |
| 2.665462494  | 0.005058105  | 8.952965736  |

|              |              |              |
|--------------|--------------|--------------|
| -1.475806713 | 12.019124031 | 8.947673798  |
| -2.890280724 | 9.581521034  | 8.866007805  |
| -2.837804794 | 14.397961617 | 8.918153763  |
| 11.023121834 | 9.575325012  | 8.791343689  |
| 9.590952873  | 11.998056412 | 8.904257774  |
| 2.697971344  | 14.360955238 | 8.961803436  |
| 6.850413322  | 11.951322556 | 8.979156494  |
| 5.455382347  | 9.488054276  | 9.080927849  |
| 5.514414787  | 14.330202103 | 8.992223740  |
| 3.012913704  | 7.635836601  | 10.708182335 |
| 5.000291824  | 6.728806973  | 9.509561539  |
| 5.504464149  | 7.074516296  | 12.477869987 |

C<sub>2</sub>N-AgMn\*CHO

| C  | N  | Ag | Mn | O | H |
|----|----|----|----|---|---|
| 49 | 24 | 1  | 1  | 1 | 1 |

Cartesian

|              |              |             |
|--------------|--------------|-------------|
| -1.494641900 | 4.731475353  | 8.920224190 |
| -0.772558570 | 3.501491308  | 8.971829414 |
| 1.399506807  | 4.759748936  | 9.068759918 |
| 0.685872078  | 3.519792557  | 9.044370651 |
| -0.778013229 | 6.003884315  | 8.888256073 |
| 5.550600529  | 2.341816187  | 9.137555122 |
| 2.661633492  | 2.367942572  | 9.127764702 |
| 3.391075850  | 3.600866556  | 9.225702286 |
| 4.839291573  | 3.565387726  | 9.304074287 |
| 3.374874115  | 1.091167212  | 9.074897766 |
| 0.649900913  | 6.013453007  | 8.945837975 |
| 4.801058292  | 1.084048510  | 9.044154167 |
| 6.906564713  | 4.674121380  | 9.328284264 |
| 7.572105885  | 3.436326742  | 9.144215584 |
| 9.740061760  | 4.705161572  | 9.056195259 |
| 9.026950836  | 3.458792686  | 9.040805817 |
| 7.613725185  | 5.918372154  | 9.329112053 |
| 13.899506569 | 2.333948135  | 8.906543732 |
| 11.005374908 | 2.335129738  | 8.895077705 |
| 11.716555595 | 3.571958780  | 8.925714493 |
| 13.178056717 | 3.572031021  | 8.905464172 |
| 11.735287666 | 1.071929216  | 8.833643913 |
| 9.017210960  | 5.971835613  | 9.160398483 |
| 13.165132523 | 1.063570976  | 8.868869781 |
| -5.714686394 | 11.938742638 | 8.969202042 |
| -4.998950958 | 10.698656082 | 8.923049927 |
| -2.822866440 | 11.942257881 | 8.823654175 |

|              |              |              |
|--------------|--------------|--------------|
| -3.534746408 | 10.703209877 | 8.843274117  |
| -4.977765560 | 13.214652061 | 8.973432541  |
| 1.313524246  | 9.585930824  | 8.742996216  |
| -1.552179098 | 9.568046570  | 8.755488396  |
| -0.841140270 | 10.810914993 | 8.717561722  |
| 0.624296188  | 10.825613022 | 8.693225861  |
| -0.820543528 | 8.296675682  | 8.777735710  |
| -3.549185753 | 13.211453438 | 8.910665512  |
| 0.598717213  | 8.325757027  | 8.792406082  |
| 2.631282806  | 11.949650764 | 8.731224060  |
| 3.340286732  | 10.715141296 | 8.798058510  |
| 5.520565510  | 11.911621094 | 8.913743973  |
| 4.795998573  | 10.683337212 | 8.919269562  |
| 3.382406235  | 13.201942444 | 8.772390366  |
| 9.668338776  | 9.541055679  | 9.036828041  |
| 6.779857159  | 9.512854576  | 9.135953903  |
| 7.493731976  | 10.759309769 | 9.048779488  |
| 8.954982758  | 10.774484634 | 9.037044525  |
| 7.522690296  | 8.273705482  | 9.266615868  |
| 4.809504986  | 13.186148643 | 8.849718094  |
| 8.943889618  | 8.266283989  | 9.134081841  |
| 4.304630280  | 7.385337353  | 11.699316025 |
| 6.895500660  | 2.284231663  | 9.083771706  |
| 5.547279835  | 4.715868473  | 9.496997833  |
| -1.490692377 | 7.141266346  | 8.815770149  |
| 2.739596128  | 4.783641815  | 9.179045677  |
| 1.332218766  | 2.348128080  | 9.061056137  |
| 1.307395458  | 7.181702137  | 8.888256073  |
| 15.236495018 | 2.319523096  | 8.951273918  |
| 13.808428764 | 4.749502659  | 8.899884224  |
| 6.877850533  | 7.078003883  | 9.492929459  |
| 11.073711395 | 4.741879940  | 8.992547989  |
| 9.672141075  | 2.293742657  | 8.948267937  |
| 9.674241066  | 7.135415554  | 9.109277725  |
| 2.657659054  | 9.561576843  | 8.792280197  |
| 1.287481785  | 11.989020348 | 8.677512169  |
| -5.654961586 | 14.366143227 | 9.044442177  |
| -1.488543034 | 11.978961945 | 8.749205589  |
| -2.886876822 | 9.533028603  | 8.807076454  |
| -2.841056347 | 14.345520973 | 8.950265884  |
| 11.004843712 | 9.521385193  | 8.965169907  |
| 9.589481354  | 11.954895973 | 9.014165878  |
| 2.704960823  | 14.353086472 | 8.770157814  |
| 6.857395172  | 11.926233292 | 8.958744049  |

|             |              |              |
|-------------|--------------|--------------|
| 5.432461739 | 9.502334595  | 9.042101860  |
| 5.521786690 | 14.319567680 | 8.881757736  |
| 3.509109020 | 7.586638451  | 9.411875725  |
| 5.372321129 | 6.417582512  | 10.523754120 |
| 4.221562862 | 6.158481121  | 12.082932472 |
| 3.924309731 | 8.216625214  | 12.314321518 |

C<sub>2</sub>N-AgMn\*COOH

|    |    |    |    |   |   |
|----|----|----|----|---|---|
| C  | N  | Ag | Mn | O | H |
| 49 | 24 | 1  | 1  | 2 | 1 |

Cartesian

|              |              |             |
|--------------|--------------|-------------|
| -1.501332641 | 4.793613911  | 9.018936157 |
| -0.780880213 | 3.566338778  | 9.004571915 |
| 1.413232565  | 4.814595699  | 9.057329178 |
| 0.687809229  | 3.578631163  | 9.006408691 |
| -0.769486427 | 6.054565907  | 9.067176819 |
| 5.534202099  | 2.345980883  | 8.719200134 |
| 2.637040138  | 2.389183760  | 8.888472557 |
| 3.382723331  | 3.603230000  | 8.889552116 |
| 4.812560081  | 3.561943531  | 8.782020569 |
| 3.351270676  | 1.109511971  | 8.833896637 |
| 0.666447878  | 6.067651272  | 9.124595642 |
| 4.779001713  | 1.092392206  | 8.752391815 |
| 6.833740234  | 4.726244450  | 8.783964157 |
| 7.524199486  | 3.492873907  | 8.718875885 |
| 9.687163353  | 4.764706135  | 8.835731506 |
| 8.987730026  | 3.519749403  | 8.749782562 |
| 7.513320923  | 5.983536720  | 8.897364616 |
| 13.878963470 | 2.409877300  | 8.927441597 |
| 10.981711388 | 2.408565760  | 8.788517952 |
| 11.686477661 | 3.648896933  | 8.857656479 |
| 13.156697273 | 3.650496244  | 8.919774055 |
| 11.714984894 | 1.143780231  | 8.817984581 |
| 8.936874390  | 6.023396015  | 8.898156166 |
| 13.143465042 | 1.138015985  | 8.895689964 |
| -5.741293907 | 11.957850456 | 8.932445526 |
| -5.027097225 | 10.712706566 | 8.946882248 |
| -2.848575115 | 11.953095436 | 8.834795952 |
| -3.558474064 | 10.713931084 | 8.915741920 |
| -5.004172802 | 13.230301857 | 8.866638184 |
| 1.296833515  | 9.647492409  | 9.189431190 |
| -1.560366154 | 9.598942757  | 8.974169731 |
| -0.854835510 | 10.840571404 | 8.898461342 |
| 0.608154297  | 10.868959427 | 8.964269638 |

|              |              |              |
|--------------|--------------|--------------|
| -0.813006878 | 8.343711853  | 9.058284760  |
| -3.577273846 | 13.220301628 | 8.801010132  |
| 0.608525276  | 8.373440742  | 9.167327881  |
| 2.602768421  | 12.019037247 | 8.960778236  |
| 3.316131592  | 10.811677933 | 9.189377785  |
| 5.500089645  | 11.985043526 | 9.052289963  |
| 4.763749123  | 10.768907547 | 9.168695450  |
| 3.359459400  | 13.271084785 | 8.887536049  |
| 9.623386383  | 9.573321342  | 9.022392273  |
| 6.733097553  | 9.567383766  | 9.134567261  |
| 7.461209297  | 10.804803848 | 9.072108269  |
| 8.919149399  | 10.810034752 | 9.028997421  |
| 7.447061062  | 8.295840263  | 9.071387291  |
| 4.787347317  | 13.259974480 | 8.960490227  |
| 8.880059242  | 8.306373596  | 9.023544312  |
| 4.188614845  | 6.890421391  | 12.085721970 |
| 6.878394604  | 2.314090252  | 8.671751976  |
| 5.474238396  | 4.749632359  | 8.784755707  |
| -1.479960918 | 7.189195633  | 9.032219887  |
| 2.775561571  | 4.819221497  | 9.014058113  |
| 1.306351423  | 2.388664961  | 8.950697899  |
| 1.332852840  | 7.232945919  | 9.199908257  |
| 15.218404770 | 2.388952971  | 8.966628075  |
| 13.798383713 | 4.821368217  | 8.972820282  |
| 6.762444496  | 7.117013454  | 9.025775909  |
| 11.024307251 | 4.812491417  | 8.879418373  |
| 9.647004128  | 2.359094620  | 8.726759911  |
| 9.602239609  | 7.175822735  | 8.966753960  |
| 2.632371902  | 9.664280891  | 9.407358170  |
| 1.260332108  | 12.042555809 | 8.891819954  |
| -5.679538727 | 14.386461258 | 8.880929947  |
| -1.513137341 | 12.000404358 | 8.818470001  |
| -2.897609711 | 9.550494194  | 8.975664139  |
| -2.866473675 | 14.350867271 | 8.735903740  |
| 10.963086128 | 9.541112900  | 8.989146233  |
| 9.563323975  | 11.985475540 | 8.980830193  |
| 11.005665779 | 0.011197002  | 8.804699898  |
| 6.833348751  | 11.986584663 | 9.027773857  |
| 5.389929295  | 9.571304321  | 9.208044052  |
| 5.498847961  | 14.393536568 | 8.956241608  |
| 3.380939484  | 8.334100723  | 10.880154610 |
| 4.536703110  | 6.404194832  | 9.448668480  |
| 4.773381233  | 5.924237251  | 11.516652107 |
| 4.135375977  | 6.888937473  | 13.423086166 |

4.595640182

6.073256969

13.746456146

C<sub>2</sub>N-AgCr\*CO

| C  | N  | Ag | Cr | O |
|----|----|----|----|---|
| 49 | 24 | 1  | 1  | 1 |

Cartesian

|              |              |             |
|--------------|--------------|-------------|
| -1.520675302 | 4.760282040  | 9.019691467 |
| -0.780613184 | 3.542791843  | 9.051713943 |
| 1.384978294  | 4.829006195  | 9.107351303 |
| 0.685437918  | 3.585447073  | 9.076769829 |
| -0.817757845 | 6.046294212  | 9.054396629 |
| 5.542195320  | 2.444246531  | 8.969759941 |
| 2.666873217  | 2.456798077  | 9.038591385 |
| 3.397280693  | 3.696062326  | 9.040607452 |
| 4.830926895  | 3.686796665  | 8.994564056 |
| 3.373790264  | 1.175728440  | 9.001800537 |
| 0.609241009  | 6.054652691  | 9.147203445 |
| 4.794042110  | 1.174388289  | 8.977319717 |
| 6.907610893  | 4.760584831  | 8.926019669 |
| 7.556496620  | 3.509445906  | 8.921844482 |
| 9.748688698  | 4.739790440  | 8.864315987 |
| 9.020269394  | 3.502759218  | 8.902529716 |
| 7.633508682  | 5.968434334  | 8.876735687 |
| 13.902619362 | 2.341239929  | 9.009341240 |
| 10.991271973 | 2.345174074  | 8.945531845 |
| 11.709299088 | 3.574495077  | 8.921772003 |
| 13.170619011 | 3.571685076  | 8.964557648 |
| 11.726668358 | 1.075877666  | 8.988497734 |
| 9.039299965  | 6.018251419  | 8.838899612 |
| 13.162619591 | 1.058815598  | 9.010656357 |
| -5.726934910 | 12.013157845 | 8.921411514 |
| -5.001432419 | 10.780998230 | 8.886077881 |
| -2.819815159 | 12.018158913 | 8.949186325 |
| -3.538500547 | 10.784269333 | 8.916552544 |
| -4.987010956 | 13.293752670 | 8.952768326 |
| 1.290827274  | 9.613339424  | 9.141965866 |
| -1.574577570 | 9.621423721  | 8.979911804 |
| -0.849552631 | 10.858742714 | 9.000701904 |
| 0.612198353  | 10.852935791 | 9.057131767 |
| -0.861053944 | 8.343294144  | 9.038304329 |
| -3.552091122 | 13.292484283 | 8.952965736 |
| 0.550727367  | 8.366048813  | 9.152351379 |
| 2.629036427  | 11.942387581 | 9.065340042 |
| 3.334780216  | 10.691364288 | 9.112554550 |

|              |              |              |
|--------------|--------------|--------------|
| 5.500182629  | 11.878592491 | 9.029339790  |
| 4.784435749  | 10.635667801 | 9.054216385  |
| 3.376091003  | 13.200545311 | 9.034703255  |
| 9.685693741  | 9.591896057  | 8.851409912  |
| 6.808509827  | 9.516659737  | 8.942328453  |
| 7.491261482  | 10.774801254 | 8.947278023  |
| 8.955747604  | 10.815093040 | 8.907192230  |
| 7.560659885  | 8.309126854  | 8.875043869  |
| 4.796386242  | 13.170598984 | 9.034955978  |
| 8.982967377  | 8.302151680  | 8.832077980  |
| 5.072988510  | 6.831785202  | 11.118707657 |
| 6.879225731  | 2.354151487  | 8.947764397  |
| 5.529029846  | 4.887743473  | 8.989199638  |
| -1.530354023 | 7.179872513  | 9.015965462  |
| 2.743428946  | 4.888709068  | 9.070253372  |
| 1.337816238  | 2.417860746  | 9.046673775  |
| 1.258141041  | 7.227498531  | 9.251405716  |
| 15.241327286 | 2.349194527  | 9.047879219  |
| 13.787071228 | 4.758394718  | 8.971325874  |
| 6.870353222  | 7.115514278  | 8.891712189  |
| 11.083053589 | 4.754258156  | 8.871822357  |
| 9.653437614  | 2.324869394  | 8.934011459  |
| 9.716238022  | 7.178359032  | 8.808947563  |
| 2.635170460  | 9.541675568  | 9.187416077  |
| 1.294552326  | 12.007004738 | 9.040391922  |
| 2.660086870  | 0.039211124  | 8.983421326  |
| -1.483453274 | 12.036632538 | 8.984718323  |
| -2.907661438 | 9.605687141  | 8.932104111  |
| 5.472927094  | 0.019627178  | 8.959644318  |
| 11.021331787 | 9.595312119  | 8.841294289  |
| 9.573505402  | 12.006860733 | 8.931978226  |
| 2.699419975  | 14.351904869 | 9.005112648  |
| 6.837027550  | 11.931392670 | 8.986248016  |
| 5.442005634  | 9.431536674  | 9.005435944  |
| 5.512052536  | 14.309509277 | 9.028530121  |
| 3.064795971  | 7.633472919  | 10.612331390 |
| 5.005506992  | 6.794014931  | 9.210078239  |
| 5.592880726  | 6.672144890  | 12.171761513 |

C<sub>2</sub>N-AgCr\*CHO

| C  | N  | Ag | Cr | O | H |
|----|----|----|----|---|---|
| 49 | 24 | 1  | 1  | 1 | 1 |

Cartesian

|              |             |             |
|--------------|-------------|-------------|
| -1.486474156 | 4.818746090 | 9.027647972 |
|--------------|-------------|-------------|

|              |              |             |
|--------------|--------------|-------------|
| -0.762219429 | 3.597105265  | 9.017568588 |
| 1.444614410  | 4.850362778  | 9.095022202 |
| 0.710795879  | 3.615161896  | 9.035496712 |
| -0.753546000 | 6.075893879  | 9.075689316 |
| 5.539643764  | 2.329379797  | 8.717129707 |
| 2.638005018  | 2.398896217  | 8.919648170 |
| 3.400502443  | 3.599929810  | 8.924112320 |
| 4.811246395  | 3.535658598  | 8.800866127 |
| 3.341220140  | 1.112739801  | 8.851302147 |
| 0.686314821  | 6.094800472  | 9.146933556 |
| 4.769634247  | 1.084206939  | 8.755362511 |
| 6.846102715  | 4.712928772  | 8.805545807 |
| 7.528475761  | 3.480019569  | 8.722025871 |
| 9.681962013  | 4.774779320  | 8.862731934 |
| 8.991865158  | 3.524144650  | 8.764505386 |
| 7.496823311  | 5.967584133  | 8.929836273 |
| 13.895160675 | 2.436003685  | 8.938241959 |
| 10.995870590 | 2.434274435  | 8.814131737 |
| 11.694055557 | 3.676982880  | 8.882532120 |
| 13.168119431 | 3.677948236  | 8.935056686 |
| 11.728255272 | 1.172039270  | 8.842949867 |
| 8.919178009  | 6.026234627  | 8.928018570 |
| 13.157351494 | 1.161923051  | 8.907281876 |
| -5.772193909 | 11.956150055 | 8.923319817 |
| -5.059743881 | 10.705904007 | 8.935416222 |
| -2.881588459 | 11.949434280 | 8.840610504 |
| -3.587552071 | 10.707201004 | 8.909910202 |
| -5.034016609 | 13.231758118 | 8.869950294 |
| 1.278561592  | 9.681472778  | 9.196109772 |
| -1.576865196 | 9.611120224  | 8.974295616 |
| -0.877407551 | 10.858742714 | 8.912034035 |
| 0.585947990  | 10.902234077 | 8.981982231 |
| -0.819663048 | 8.363944054  | 9.059723854 |
| -3.608747482 | 13.214465141 | 8.805150032 |
| 0.598897934  | 8.403487206  | 9.176741600 |
| 2.581303120  | 12.055208206 | 8.977392197 |
| 3.293910503  | 10.845873833 | 9.190296173 |
| 5.483507633  | 12.003704071 | 9.042713165 |
| 4.739928722  | 10.795754433 | 9.165707588 |
| 3.350448132  | 13.301044464 | 8.905482292 |
| 9.582943916  | 9.570424080  | 9.013284683 |
| 6.694809437  | 9.565366745  | 9.137772560 |
| 7.431415558  | 10.802052498 | 9.059669495 |
| 8.886602402  | 10.808017731 | 9.013859749 |



|              |              |              |
|--------------|--------------|--------------|
| 7.394081593  | 8.285695076  | 9.091979980  |
| 4.780882835  | 13.282670975 | 8.960760117  |
| 8.830864906  | 8.304168701  | 9.035387993  |
| 4.276929855  | 6.855619907  | 11.951622009 |
| 6.884551525  | 2.298353910  | 8.667072296  |
| 5.478632450  | 4.729457855  | 8.827685356  |
| -1.472756624 | 7.202511311  | 9.033371925  |
| 2.824931145  | 4.847321987  | 9.054989815  |
| 1.310460448  | 2.413998604  | 8.980290413  |
| 1.333575249  | 7.271436691  | 9.223812103  |
| 15.235651016 | 2.418509245  | 8.976564407  |
| 13.811835289 | 4.846860886  | 8.983619690  |
| 6.707726002  | 7.090281963  | 9.055530548  |
| 11.020162582 | 4.834510803  | 8.908811569  |
| 9.662679672  | 2.372409821  | 8.743373871  |
| 9.569841385  | 7.183575630  | 8.986410141  |
| 2.613318443  | 9.698203087  | 9.395261765  |
| 1.237002850  | 12.078697205 | 8.912952423  |
| -5.699481964 | 14.394200325 | 8.894322395  |
| -1.547081947 | 12.010463715 | 8.836038589  |
| -2.915156126 | 9.549731255  | 8.967311859  |
| -2.888595581 | 14.338171959 | 8.734968185  |
| 10.924548149 | 9.536416054  | 8.977463722  |
| 9.533130646  | 11.983587265 | 8.966267586  |
| 11.008193970 | 0.046675790  | 8.836596489  |
| 6.815510273  | 11.988458633 | 9.012546539  |
| 5.352663517  | 9.593423843  | 9.216107368  |
| 13.823131561 | 0.000432317  | 8.955827713  |
| 3.457876205  | 8.252867699  | 10.707029343 |
| 4.569327831  | 6.275321484  | 9.441828728  |
| 4.863245010  | 5.852977276  | 11.485224724 |
| 4.251728058  | 6.907627583  | 13.068395615 |

C<sub>2</sub>N-AgCr\*COOH

| C  | N  | Ag | Cr | O | H |
|----|----|----|----|---|---|
| 49 | 24 | 1  | 1  | 2 | 1 |

Cartesian

|              |             |             |
|--------------|-------------|-------------|
| -1.481631517 | 4.808110714 | 9.020700455 |
| -0.756495237 | 3.587277412 | 9.010151863 |
| 1.449972153  | 4.843128681 | 9.087858200 |
| 0.716262341  | 3.607192516 | 9.025415421 |
| -0.750916958 | 6.067132473 | 9.075617790 |
| 5.545317650  | 2.330647945 | 8.714214325 |
| 2.646740437  | 2.396331310 | 8.908452034 |

|              |              |              |
|--------------|--------------|--------------|
| 3.406959057  | 3.601313114  | 8.917595863  |
| 4.819391727  | 3.540255785  | 8.795501709  |
| 3.348649979  | 1.110419750  | 8.843310356  |
| 0.689110041  | 6.086759567  | 9.144107819  |
| 4.776597977  | 1.083443284  | 8.749620438  |
| 6.857268333  | 4.708231449  | 8.799695969  |
| 7.537029266  | 3.472958326  | 8.716553688  |
| 9.692304611  | 4.765109539  | 8.848799706  |
| 9.001116753  | 3.514662504  | 8.750105858  |
| 7.509977341  | 5.958433628  | 8.927514076  |
| 13.902584076 | 2.422832251  | 8.925264359  |
| 11.003841400 | 2.421074390  | 8.782559395  |
| 11.702383995 | 3.663509130  | 8.855567932  |
| 13.175991058 | 3.664114237  | 8.914968491  |
| 11.736375809 | 1.157888055  | 8.813285828  |
| 8.931749344  | 6.017747402  | 8.923913956  |
| 13.164863586 | 1.147901654  | 8.893890381  |
| -5.764672279 | 11.952115059 | 8.930160522  |
| -5.051815033 | 10.702921867 | 8.945945740  |
| -2.872935295 | 11.946004868 | 8.834615707  |
| -3.579739571 | 10.704910278 | 8.915831566  |
| -5.026386738 | 13.228572845 | 8.868185997  |
| 1.285184860  | 9.669425011  | 9.185688019  |
| -1.571240425 | 9.604317665  | 8.976311684  |
| -0.869952679 | 10.850212097 | 8.899955750  |
| 0.594576359  | 10.890056610 | 8.963352203  |
| -0.816659927 | 8.355111122  | 9.062585831  |
| -3.600003242 | 13.212203026 | 8.799030304  |
| 0.602509499  | 8.393544197  | 9.172403336  |
| 2.592061043  | 12.039313316 | 8.956421852  |
| 3.302562237  | 10.829359055 | 9.181943893  |
| 5.491203308  | 11.988645554 | 9.050724030  |
| 4.749322414  | 10.778562546 | 9.167364120  |
| 3.360339642  | 13.286128998 | 8.884475708  |
| 9.593601227  | 9.563147545  | 9.029196739  |
| 6.706799507  | 9.553506851  | 9.148752213  |
| 7.440982819  | 10.791964531 | 9.076302528  |
| 8.896410942  | 10.800423622 | 9.030672073  |
| 7.406228542  | 8.277337074  | 9.100926399  |
| 4.789310932  | 13.267899513 | 8.958581924  |
| 8.842736244  | 8.294816971  | 9.045611382  |
| 4.205854893  | 6.834739208  | 11.991293907 |
| 6.890483856  | 2.294564009  | 8.661149979  |
| 5.488158226  | 4.735438347  | 8.810946465  |

|              |              |              |
|--------------|--------------|--------------|
| -1.470984221 | 7.193965912  | 9.038177490  |
| 2.827102900  | 4.842523098  | 9.048923492  |
| 1.319396257  | 2.409300804  | 8.966087341  |
| 1.337885380  | 7.262156487  | 9.217350006  |
| 15.242857933 | 2.407672405  | 8.968338013  |
| 13.817626953 | 4.834035397  | 8.967095375  |
| 6.717536449  | 7.079863071  | 9.060606003  |
| 11.030971527 | 4.822305202  | 8.887176514  |
| 9.669776917  | 2.361645222  | 8.717975616  |
| 9.583003998  | 7.174987316  | 8.989883423  |
| 2.619949818  | 9.683605194  | 9.389879227  |
| 1.248185158  | 12.063854218 | 8.887122154  |
| -5.691968918 | 14.390698433 | 8.888525963  |
| -1.537647247 | 12.002882957 | 8.819747925  |
| -2.909440517 | 9.546921730  | 8.977121353  |
| -2.880549431 | 14.336917877 | 8.728542328  |
| 10.935298920 | 9.532150269  | 8.991917610  |
| 9.540460587  | 11.977146149 | 8.976582527  |
| 11.017729759 | 0.030824179  | 8.799965858  |
| 6.824048519  | 11.976986885 | 9.027972221  |
| 5.362980843  | 9.575986862  | 9.218861580  |
| 5.510162354  | 14.397370338 | 8.956602097  |
| 3.424636841  | 8.261845589  | 10.748250008 |
| 4.617890358  | 6.310411453  | 9.412271500  |
| 4.778308392  | 5.826303005  | 11.500577927 |
| 4.120632648  | 6.931909561  | 13.326066017 |
| 4.554581165  | 6.134371758  | 13.721597672 |

C<sub>2</sub>N-CuNi\*CO

| C  | N  | Cu | Ni | O |
|----|----|----|----|---|
| 49 | 24 | 1  | 1  | 1 |

Cartesian

|              |             |             |
|--------------|-------------|-------------|
| -1.415087223 | 4.711992264 | 8.949636459 |
| -0.697430134 | 3.478117228 | 8.977319717 |
| 1.471282482  | 4.738060951 | 9.011555672 |
| 0.762115479  | 3.494314909 | 9.012078285 |
| -0.698807716 | 5.986822128 | 8.947170258 |
| 5.632202148  | 2.336743832 | 9.064800262 |
| 2.742303133  | 2.353906631 | 9.057095528 |
| 3.465746880  | 3.592320919 | 9.058896065 |
| 4.920551300  | 3.576411724 | 9.096336365 |
| 3.457789660  | 1.080618739 | 9.057726860 |
| 0.729056358  | 5.993220329 | 8.993951797 |
| 4.884148121  | 1.074782491 | 9.045018196 |

|              |              |              |
|--------------|--------------|--------------|
| 6.967050552  | 4.676369667  | 9.119483948  |
| 7.641536236  | 3.436744690  | 9.067445755  |
| 9.819931984  | 4.689396858  | 9.029934883  |
| 9.103817940  | 3.448402882  | 9.031104088  |
| 7.687638760  | 5.925058842  | 9.118512154  |
| 13.975234985 | 2.310746908  | 8.959608078  |
| 11.080162048 | 2.310963154  | 8.973522186  |
| 11.793479919 | 3.546999931  | 8.973954201  |
| 13.257195473 | 3.549694538  | 8.954567909  |
| 11.809576035 | 1.042027354  | 8.953056335  |
| 9.098330498  | 5.961344242  | 9.065070152  |
| 13.241375923 | 1.039736032  | 8.960003853  |
| -5.625905037 | 11.930369377 | 9.033425331  |
| -4.907416344 | 10.692977905 | 9.002898216  |
| -2.730025768 | 11.931666374 | 8.960940361  |
| -3.443527460 | 10.695831299 | 8.961929321  |
| -4.890340805 | 13.203873634 | 9.032544136  |
| 1.389834404  | 9.560020447  | 8.976275444  |
| -1.468472958 | 9.553074837  | 8.917451859  |
| -0.752832890 | 10.792584419 | 8.915975571  |
| 0.712820053  | 10.801749229 | 8.925461769  |
| -0.743601799 | 8.279181480  | 8.928270340  |
| -3.459455967 | 13.200458527 | 9.002016068  |
| 0.670476437  | 8.313809395  | 8.977733612  |
| 2.720247746  | 11.909661293 | 8.942760468  |
| 3.428719997  | 10.670080185 | 8.990243912  |
| 5.609138966  | 11.890755653 | 9.014490128  |
| 4.886577606  | 10.654906273 | 9.009954453  |
| 3.466270447  | 13.167414665 | 8.947458267  |
| 9.765041351  | 9.530204773  | 9.044567108  |
| 6.875517368  | 9.499740601  | 9.059993744  |
| 7.586432457  | 10.745273590 | 9.059778214  |
| 9.046751022  | 10.762436867 | 9.059291840  |
| 7.616430283  | 8.247608185  | 9.096209526  |
| 4.893693924  | 13.163163185 | 8.979570389  |
| 9.045808792  | 8.251382828  | 9.063540459  |
| 4.258571625  | 7.061373711  | 11.223846436 |
| 6.972443104  | 2.276651621  | 9.055799484  |
| 5.607614517  | 4.742442131  | 9.167526245  |
| -1.415813684 | 7.124809265  | 8.919540405  |
| 2.813393116  | 4.766089916  | 9.018737793  |
| 1.409368873  | 2.328054190  | 9.028745651  |
| 1.394711971  | 7.165807247  | 9.033408165  |
| 15.312662125 | 2.296941757  | 8.974728584  |

|              |              |              |
|--------------|--------------|--------------|
| 13.886194229 | 4.726806164  | 8.943191528  |
| 6.950315475  | 7.069328308  | 9.167003632  |
| 11.154439926 | 4.719586372  | 9.001367569  |
| 9.745182037  | 2.277761221  | 9.002321243  |
| 9.768213272  | 7.121047974  | 9.052325249  |
| 2.746315479  | 9.507076263  | 9.030221939  |
| 1.376204491  | 11.961150169 | 8.914536476  |
| -5.570290089 | 14.353878975 | 9.056951523  |
| -1.393638611 | 11.963931084 | 8.933706284  |
| -2.803345680 | 9.522509575  | 8.936063766  |
| -2.754297733 | 14.335721970 | 9.015011787  |
| 11.101537704 | 9.514757156  | 9.014616013  |
| 9.677746773  | 11.944189072 | 9.058643341  |
| 2.784332275  | 14.319251060 | 8.939880371  |
| 6.942698479  | 11.912817001 | 9.033678055  |
| 5.532799244  | 9.478211403  | 9.017981529  |
| 5.601939201  | 14.298874855 | 8.977986336  |
| 3.276401997  | 7.641860485  | 9.533213615  |
| 5.226504803  | 6.515372753  | 9.893321991  |
| 3.902170181  | 7.258208275  | 12.334085464 |

C<sub>2</sub>N-CuNi\*CHO

| C  | N  | Cu | Ni | O | H |
|----|----|----|----|---|---|
| 49 | 24 | 1  | 1  | 1 | 1 |

Cartesian

|              |             |             |
|--------------|-------------|-------------|
| -1.422358155 | 4.682537079 | 9.005166054 |
| -0.697820306 | 3.453518391 | 9.064980507 |
| 1.460982561  | 4.732555866 | 9.144324303 |
| 0.761350393  | 3.481575727 | 9.103715897 |
| -0.714623213 | 5.969745636 | 9.025091171 |
| 5.632317543  | 2.357235670 | 9.022644043 |
| 2.752628326  | 2.358935833 | 9.087408066 |
| 3.468475580  | 3.605924368 | 9.102509499 |
| 4.929993629  | 3.603143215 | 9.061056137 |
| 3.469994545  | 1.090432286 | 9.041472435 |
| 0.706434965  | 5.974991322 | 9.161279678 |
| 4.895097256  | 1.093112707 | 9.014418602 |
| 6.975618362  | 4.694295883 | 8.965836525 |
| 7.644223213  | 3.445290089 | 8.960472107 |
| 9.837337494  | 4.667607784 | 8.887643814 |
| 9.111139297  | 3.434972048 | 8.937215805 |
| 7.714495659  | 5.923156738 | 8.921321869 |
| 13.980386734 | 2.271017075 | 9.041975021 |
| 11.077384949 | 2.268365622 | 8.987921715 |

|              |              |              |
|--------------|--------------|--------------|
| 11.797634125 | 3.499689817  | 8.941752434  |
| 13.259609222 | 3.504099607  | 8.973720551  |
| 11.807672501 | 0.993939221  | 9.048761368  |
| 9.126884460  | 5.951545238  | 8.870418549  |
| 13.243323326 | 0.994429231  | 9.074610710  |
| -5.603692055 | 11.940917969 | 8.924201965  |
| -4.885044575 | 10.709593773 | 8.854829788  |
| -2.701763630 | 11.943065643 | 8.913204193  |
| -3.422811270 | 10.712259293 | 8.858861923  |
| -4.868825912 | 13.213730812 | 8.958240509  |
| 1.382222652  | 9.522509575  | 9.180450439  |
| -1.465494156 | 9.544860840  | 8.913492203  |
| -0.736326218 | 10.777251244 | 8.964486122  |
| 0.726814747  | 10.769671440 | 9.063809395  |
| -0.763085842 | 8.264281273  | 8.980020523  |
| -3.433615208 | 13.215502739 | 8.945640564  |
| 0.637529850  | 8.298418999  | 9.144162178  |
| 2.741913795  | 11.842998505 | 9.157373428  |
| 3.447699547  | 10.590577126 | 9.244764328  |
| 5.619581699  | 11.843762398 | 9.154853821  |
| 4.909774303  | 10.592968941 | 9.179765701  |
| 3.480508327  | 13.113417625 | 9.132911682  |
| 9.799360275  | 9.530997276  | 8.869194031  |
| 6.925977707  | 9.486497879  | 9.014147758  |
| 7.616316795  | 10.735301971 | 9.028601646  |
| 9.076710701  | 10.761269569 | 8.954675674  |
| 7.676140785  | 8.249063492  | 8.937323570  |
| 4.902956009  | 13.115046501 | 9.150192261  |
| 9.093580246  | 8.247608185  | 8.868887901  |
| 4.415926456  | 7.310994148  | 11.264382362 |
| 6.976643562  | 2.292171717  | 8.987544060  |
| 5.614310265  | 4.773467541  | 9.044712067  |
| -1.432885170 | 7.103712082  | 8.946198463  |
| 2.804249763  | 4.772099018  | 9.131148338  |
| 1.419360995  | 2.323745489  | 9.082475662  |
| 1.356982231  | 7.157867432  | 9.283464432  |
| 15.316915512 | 2.267299175  | 9.081665993  |
| 13.882400513 | 4.686399460  | 8.954981804  |
| 6.998121262  | 7.078436375  | 8.961660385  |
| 11.171079636 | 4.679727077  | 8.886221886  |
| 9.738526344  | 2.255136728  | 8.982432365  |
| 9.809413910  | 7.104505062  | 8.834706306  |
| 2.740693569  | 9.425570488  | 9.346464157  |
| 1.405058861  | 11.918293953 | 9.090432167  |

|              |              |              |
|--------------|--------------|--------------|
| -5.552660465 | 14.360090256 | 9.008783340  |
| -1.364777565 | 11.957116127 | 8.957592010  |
| -2.797705173 | 9.532683372  | 8.851464272  |
| -2.736375809 | 14.353504181 | 8.971632004  |
| 11.134832382 | 9.527034760  | 8.819514275  |
| 9.697914124  | 11.946206093 | 8.973449707  |
| 2.791696548  | 14.262631416 | 9.080225945  |
| 6.954220295  | 11.888939857 | 9.085140228  |
| 5.580214977  | 9.433293343  | 9.079596519  |
| 5.605935097  | 14.257659912 | 9.126485825  |
| 5.171546936  | 6.745898247  | 9.556074142  |
| 3.027123928  | 7.642234802  | 10.084733963 |
| 3.436019659  | 6.576573849  | 11.657015800 |
| 5.040797710  | 7.844991207  | 12.009725571 |

C<sub>2</sub>N-CuNi\*COOH

| C  | N  | Cu | Ni | O | H |
|----|----|----|----|---|---|
| 49 | 24 | 1  | 1  | 2 | 1 |

Cartesian

|              |              |             |
|--------------|--------------|-------------|
| -1.480723023 | 4.740453243  | 8.889030457 |
| -0.762158990 | 3.512126207  | 8.975358009 |
| 1.406303406  | 4.779477119  | 9.111059189 |
| 0.698243141  | 3.535831451  | 9.059796333 |
| -0.763753414 | 6.018208504  | 8.886329651 |
| 5.561257362  | 2.372121572  | 9.031895638 |
| 2.678522587  | 2.391662359  | 9.109188080 |
| 3.401899576  | 3.627684593  | 9.183869362 |
| 4.857577324  | 3.609887600  | 9.177965164 |
| 3.387977362  | 1.114699721  | 9.045125961 |
| 0.658744574  | 6.029923916  | 9.028403282 |
| 4.810999393  | 1.110145926  | 8.984286308 |
| 6.914000988  | 4.700723648  | 9.093348503 |
| 7.575958252  | 3.459628582  | 8.961533546 |
| 9.753265381  | 4.714514256  | 8.886834145 |
| 9.038024902  | 3.472612619  | 8.886797905 |
| 7.625156403  | 5.939844131  | 9.084743500 |
| 13.912336349 | 2.337204695  | 8.908488274 |
| 11.016648293 | 2.336066484  | 8.839116096 |
| 11.729300499 | 3.571814775  | 8.837027550 |
| 13.192989349 | 3.574178219  | 8.849448204 |
| 11.746703148 | 1.067029595  | 8.856036186 |
| 9.030298233  | 5.987787724  | 8.959301949 |
| 13.177087784 | 1.062893748  | 8.912772179 |
| -5.703014374 | 11.959939957 | 8.943408012 |

|              |              |              |
|--------------|--------------|--------------|
| -4.987095833 | 10.721842766 | 8.866169930  |
| -2.808399677 | 11.964609146 | 8.785619736  |
| -3.523115158 | 10.726842880 | 8.786142349  |
| -4.966218472 | 13.236182213 | 8.943389893  |
| 1.311244965  | 9.594115257  | 8.914265633  |
| -1.544134140 | 9.582990646  | 8.737020493  |
| -0.827146053 | 10.824460030 | 8.738154411  |
| 0.638281345  | 10.834302902 | 8.793126106  |
| -0.818888187 | 8.309688568  | 8.786808014  |
| -3.536349297 | 13.234698296 | 8.864658356  |
| 0.591744900  | 8.347112656  | 8.908649445  |
| 2.649162769  | 11.933150291 | 8.902476311  |
| 3.350903034  | 10.696235657 | 9.046925545  |
| 5.530258179  | 11.908408165 | 9.074141502  |
| 4.806599140  | 10.674201012 | 9.128232002  |
| 3.397665501  | 13.192460060 | 8.905158043  |
| 9.685254097  | 9.556259155  | 8.983890533  |
| 6.801896572  | 9.519843102  | 9.180576324  |
| 7.510862827  | 10.764397621 | 9.108774185  |
| 8.970830917  | 10.786921501 | 9.043002129  |
| 7.542374134  | 8.267767906  | 9.165168762  |
| 4.820654392  | 13.184938431 | 8.990442276  |
| 8.966153145  | 8.275218964  | 9.028674126  |
| 3.607457638  | 7.270586491  | 11.671955109 |
| 6.901565552  | 2.305861950  | 8.950284004  |
| 5.562170982  | 4.772444725  | 9.262151718  |
| -1.483229876 | 7.149552345  | 8.781875610  |
| 2.750477791  | 4.807159901  | 9.192419052  |
| 1.345380068  | 2.368475914  | 9.065285683  |
| 1.315988541  | 7.210768223  | 9.070164680  |
| 15.249796867 | 2.328010798  | 8.973828316  |
| 13.822254181 | 4.753336430  | 8.829431534  |
| 6.877434254  | 7.077312469  | 9.233657837  |
| 11.087329865 | 4.745295525  | 8.852489471  |
| 9.680202484  | 2.302633762  | 8.854290009  |
| 9.694724083  | 7.148154259  | 8.944902420  |
| 2.656960011  | 9.536243439  | 9.089171410  |
| 1.309869289  | 11.990620613 | 8.795286179  |
| -5.642498970 | 14.388507843 | 9.026280403  |
| -1.471496105 | 11.994914055 | 8.749728203  |
| -2.879847288 | 9.554141045  | 8.749259949  |
| -2.830324173 | 14.370969772 | 8.886311531  |
| 11.020626068 | 9.542439461  | 8.888274193  |
| 9.600786209  | 11.970301628 | 9.025019646  |



|             |              |              |
|-------------|--------------|--------------|
| 2.718930244 | 14.343849182 | 8.841923714  |
| 6.864640713 | 11.931177139 | 9.075078011  |
| 5.455183506 | 9.495806694  | 9.205757141  |
| 5.533151627 | 14.319769859 | 8.982864380  |
| 3.028684139 | 7.782506943  | 9.966221809  |
| 5.211653709 | 6.529509068  | 9.986346245  |
| 4.607851505 | 6.500688553  | 11.846015930 |
| 2.960356236 | 7.674470901  | 12.783725739 |
| 3.418322563 | 7.272358894  | 13.563684464 |

C<sub>2</sub>N-CuFe\*CO

| C            | N  | Fe | Cu           | O           |
|--------------|----|----|--------------|-------------|
| 49           | 24 | 1  | 1            | 1           |
| Cartesian    |    |    |              |             |
| -1.402640820 |    |    | 4.708072662  | 8.982917786 |
| -0.680923581 |    |    | 3.479327679  | 9.031733513 |
| 1.480408907  |    |    | 4.754503727  | 9.085301399 |
| 0.777631760  |    |    | 3.505338907  | 9.074592590 |
| -0.690804243 |    |    | 5.990741730  | 8.995050430 |
| 5.642618179  |    |    | 2.331988335  | 9.043128014 |
| 2.760789394  |    |    | 2.371026516  | 9.098586082 |
| 3.486537457  |    |    | 3.607898712  | 9.141227722 |
| 4.941692352  |    |    | 3.571065426  | 9.166302681 |
| 3.466866732  |    |    | 1.089164257  | 9.052253723 |
| 0.732084751  |    |    | 5.993796825  | 9.051462173 |
| 4.890986919  |    |    | 1.076713562  | 9.009989738 |
| 7.000728607  |    |    | 4.660431385  | 9.141300201 |
| 7.662451267  |    |    | 3.423198700  | 8.995032310 |
| 9.842205048  |    |    | 4.677190781  | 8.917236328 |
| 9.124993324  |    |    | 3.435188293  | 8.918370247 |
| 7.718722820  |    |    | 5.904509068  | 9.137430191 |
| 13.997682571 |    |    | 2.300400257  | 8.973863602 |
| 11.102234840 |    |    | 2.298584700  | 8.889120102 |
| 11.814947128 |    |    | 3.532733440  | 8.891513824 |
| 13.276413918 |    |    | 3.535889387  | 8.925966263 |
| 11.830068588 |    |    | 1.031060815  | 8.918153763 |
| 9.121086121  |    |    | 5.949945450  | 8.989452362 |
| 13.260694504 |    |    | 1.024114966  | 8.969202042 |
| -5.633992195 |    |    | 11.933626175 | 8.984466553 |
| -4.912116528 |    |    | 10.696767807 | 8.946053505 |
| -2.734701633 |    |    | 11.932790756 | 8.926181793 |
| -3.447221518 |    |    | 10.698684692 | 8.926469803 |
| -4.897237778 |    |    | 13.209450722 | 8.988083839 |
| 1.372154713  |    |    | 9.562858582  | 9.020105362 |

|              |              |              |
|--------------|--------------|--------------|
| -1.472990513 | 9.553606987  | 8.942004204  |
| -0.756177425 | 10.794889450 | 8.938097954  |
| 0.709125519  | 10.805899620 | 8.963640213  |
| -0.749857426 | 8.279066086  | 8.973252296  |
| -3.465055466 | 13.202663422 | 8.950139999  |
| 0.658370495  | 8.326562881  | 9.025289536  |
| 2.720530987  | 11.899112701 | 8.976347923  |
| 3.429218292  | 10.665352821 | 9.034901619  |
| 5.606609821  | 11.870436668 | 9.054000854  |
| 4.876519203  | 10.637166023 | 9.066005707  |
| 3.475065231  | 13.157255173 | 8.964792252  |
| 9.766763687  | 9.523360252  | 8.998505592  |
| 6.872706890  | 9.473859787  | 9.124128342  |
| 7.580758095  | 10.720920563 | 9.081432343  |
| 9.043956757  | 10.750476837 | 9.039491653  |
| 7.632137775  | 8.232275009  | 9.153269768  |
| 4.899900913  | 13.146619797 | 9.014004707  |
| 9.055675507  | 8.244783401  | 9.030833244  |
| 3.851202011  | 7.308183670  | 11.114892006 |
| 6.986079216  | 2.268682718  | 8.972820282  |
| 5.649271011  | 4.719889164  | 9.278063774  |
| -1.420273066 | 7.119967461  | 8.963244438  |
| 2.829641581  | 4.792532921  | 9.112301826  |
| 1.427871704  | 2.341629028  | 9.070775986  |
| 1.405552387  | 7.179050922  | 9.087515831  |
| -1.306660652 | 2.292935610  | 9.025794029  |
| 13.902308464 | 4.717540741  | 8.930250168  |
| 6.991093159  | 7.045507908  | 9.269459724  |
| 11.175655365 | 4.708173275  | 8.892323494  |
| 9.764549255  | 2.264820814  | 8.891136169  |
| 9.782341003  | 7.112978458  | 8.962812424  |
| 2.739744186  | 9.489726067  | 9.078318596  |
| 1.377826691  | 11.966064453 | 8.947134018  |
| -5.569434166 | 14.366776466 | 9.036359787  |
| -1.397823811 | 11.965127945 | 8.926218033  |
| -2.807330847 | 9.524512291  | 8.930610657  |
| -2.754213810 | 14.333127975 | 8.954766273  |
| 11.103807449 | 9.515952110  | 8.947332382  |
| 9.667147636  | 11.937099457 | 9.028169632  |
| 2.799542427  | 14.308759689 | 8.915273666  |
| 6.939462662  | 11.889631271 | 9.051444054  |
| 5.518306255  | 9.449823380  | 9.094211578  |
| 5.614537239  | 14.281639099 | 9.014796257  |
| 3.293533325  | 7.630432606  | 9.388925552  |

|             |             |              |
|-------------|-------------|--------------|
| 5.206778526 | 6.527318954 | 9.961199760  |
| 3.728091717 | 7.378290653 | 12.292290688 |

C<sub>2</sub>N-CuFe\*CHO

|    |    |    |    |   |   |
|----|----|----|----|---|---|
| C  | N  | Fe | Cu | O | H |
| 49 | 24 | 1  | 1  | 1 | 1 |

Cartesian

|              |              |             |
|--------------|--------------|-------------|
| -1.396983266 | 4.704729557  | 8.928702354 |
| -0.675041318 | 3.477353573  | 9.003959656 |
| 1.483537197  | 4.751448154  | 9.128412247 |
| 0.783987999  | 3.502226114  | 9.079092026 |
| -0.684714317 | 5.988811016  | 8.946864128 |
| 5.647085667  | 2.336758137  | 9.041183472 |
| 2.769184113  | 2.370089769  | 9.129708290 |
| 3.491878748  | 3.607581615  | 9.197225571 |
| 4.947291374  | 3.574855328  | 9.189414024 |
| 3.475544214  | 1.089610934  | 9.075870514 |
| 0.737176180  | 5.988119125  | 9.063719749 |
| 4.898715973  | 1.078053713  | 9.016434669 |
| 7.006252289  | 4.663111687  | 9.106865883 |
| 7.666620255  | 3.424855947  | 8.953632355 |
| 9.846472740  | 4.677234173  | 8.854793549 |
| 9.129043579  | 3.435116053  | 8.868149757 |
| 7.724771023  | 5.904466152  | 9.103536606 |
| 14.002348900 | 2.299377203  | 8.939718246 |
| 11.106462479 | 2.296538115  | 8.848854065 |
| 11.819604874 | 3.530831337  | 8.830566406 |
| 13.281538963 | 3.533353090  | 8.865072250 |
| 11.835109711 | 1.029417992  | 8.898714066 |
| 9.126085281  | 5.950651646  | 8.936712265 |
| 13.265270233 | 1.022760391  | 8.953722000 |
| -5.621778488 | 11.930974960 | 8.992332458 |
| -4.901110172 | 10.694736481 | 8.918370247 |
| -2.721339703 | 11.932617188 | 8.890955925 |
| -3.435589790 | 10.696724892 | 8.873909950 |
| -4.883975983 | 13.208642960 | 8.998596191 |
| 1.385001183  | 9.559631348  | 9.003186226 |
| -1.459429264 | 9.549775124  | 8.859581947 |
| -0.741501808 | 10.792007446 | 8.877258301 |
| 0.719949245  | 10.801072121 | 8.924183846 |
| -0.738542557 | 8.277827263  | 8.895239830 |
| -3.452051640 | 13.202793121 | 8.940923691 |
| 0.668520451  | 8.320713043  | 8.992134094 |
| 2.729258060  | 11.896591187 | 8.995446205 |

|              |              |              |
|--------------|--------------|--------------|
| 3.441050053  | 10.664085388 | 9.093779564  |
| 5.616544724  | 11.869715691 | 9.106884003  |
| 4.886129379  | 10.637468338 | 9.151686668  |
| 3.483485222  | 13.156246185 | 8.981136322  |
| 9.774758339  | 9.523230553  | 8.990262032  |
| 6.883830070  | 9.474248886  | 9.196128845  |
| 7.591773510  | 10.719969749 | 9.131814957  |
| 9.053590775  | 10.749698639 | 9.067031860  |
| 7.640390873  | 8.231496811  | 9.179622650  |
| 4.907538414  | 13.145640373 | 9.039780617  |
| 9.060617447  | 8.244091988  | 9.016272545  |
| 4.295479774  | 7.000907421  | 11.611116409 |
| 6.988841534  | 2.272112370  | 8.944217682  |
| 5.658273697  | 4.726835251  | 9.282527924  |
| -1.409873247 | 7.114376068  | 8.872830391  |
| 2.832329035  | 4.791999340  | 9.207828522  |
| 1.434552550  | 2.339481831  | 9.087282181  |
| 1.410752296  | 7.174770832  | 9.105263710  |
| -1.302076459 | 2.291854858  | 9.005723953  |
| 13.909347534 | 4.714571953  | 8.855477333  |
| 6.998480320  | 7.040752411  | 9.285894394  |
| 11.179914474 | 4.706271172  | 8.821782112  |
| 9.768601418  | 2.264287233  | 8.853425980  |
| 9.786624908  | 7.113828659  | 8.917181969  |
| 2.748430252  | 9.487621307  | 9.123929977  |
| 1.392103195  | 11.963816643 | 8.926830292  |
| -5.557744980 | 14.363793373 | 9.063702583  |
| -1.385543823 | 11.963196754 | 8.883702278  |
| -2.795691252 | 9.524065971  | 8.848746300  |
| -2.744137764 | 14.336399078 | 8.947026253  |
| 11.110763550 | 9.514915466  | 8.911782265  |
| 9.680567741  | 11.935903549 | 9.061830521  |
| 2.806513786  | 14.305474281 | 8.911295891  |
| 6.948713779  | 11.889977455 | 9.103518486  |
| 5.528481960  | 9.450067520  | 9.216665268  |
| 5.620360374  | 14.281811714 | 9.023903847  |
| 3.251093388  | 7.650506496  | 9.632213593  |
| 5.281740189  | 6.493194580  | 10.109879494 |
| 3.205525875  | 7.633862019  | 11.685977936 |
| 4.723742962  | 6.687939167  | 12.600864410 |

C<sub>2</sub>N-CuFe\*COOH

| C  | N  | Cu | Fe | O | H |
|----|----|----|----|---|---|
| 49 | 24 | 1  | 1  | 2 | 1 |

## Cartesian

|              |              |             |
|--------------|--------------|-------------|
| -1.380002022 | 4.694108963  | 8.970479965 |
| -0.657918930 | 3.466949224  | 9.031931877 |
| 1.503612995  | 4.741837025  | 9.149166107 |
| 0.802924395  | 3.492571115  | 9.099683762 |
| -0.666884661 | 5.977700233  | 8.996742249 |
| 5.665289879  | 2.324566841  | 8.991324425 |
| 2.787563086  | 2.359843731  | 9.117828369 |
| 3.510981560  | 3.596226454  | 9.184823990 |
| 4.966310501  | 3.561021328  | 9.161315918 |
| 3.492857933  | 1.079163313  | 9.045882225 |
| 0.756803274  | 5.977556229  | 9.099810600 |
| 4.915090084  | 1.066035271  | 8.967275620 |
| 7.020480156  | 4.650401592  | 9.073854446 |
| 7.682819366  | 3.414754152  | 8.903016090 |
| 9.862955093  | 4.666555882  | 8.822358131 |
| 9.145825386  | 3.424438000  | 8.822052002 |
| 7.739521980  | 5.895084858  | 9.072359085 |
| 14.020137787 | 2.289088011  | 8.945927620 |
| 11.124457359 | 2.286494017  | 8.820558548 |
| 11.837409973 | 3.521521807  | 8.821980476 |
| 13.299401283 | 3.523625851  | 8.878643990 |
| 11.853746414 | 1.019244194  | 8.877059937 |
| 9.140820503  | 5.939051151  | 8.901521683 |
| 13.283150673 | 1.012456775  | 8.945657730 |
| -5.608183861 | 11.918840408 | 8.960616112 |
| -4.886025429 | 10.682559013 | 8.894483566 |
| -2.706097603 | 11.919532776 | 8.865630150 |
| -3.420123100 | 10.683135986 | 8.864658356 |
| -4.869382858 | 13.197173119 | 8.962091446 |
| 1.402672768  | 9.548707962  | 9.031302452 |
| -1.443363190 | 9.536416054  | 8.889768600 |
| -0.725227356 | 10.779441833 | 8.889858246 |
| 0.735831738  | 10.789126396 | 8.942813873 |
| -0.721528053 | 8.266341209  | 8.942921638 |
| -3.437766075 | 13.189750671 | 8.896535873 |
| 0.686375141  | 8.309356689  | 9.031986237 |
| 2.744759083  | 11.886259079 | 8.995553970 |
| 3.456691742  | 10.653594017 | 9.096588135 |
| 5.632045269  | 11.857336998 | 9.096047401 |
| 4.900572300  | 10.625911713 | 9.144900322 |
| 3.499858856  | 13.145841599 | 8.969399452 |
| 9.790142059  | 9.511139870  | 8.963261604 |
| 6.897167683  | 9.460457802  | 9.179568291 |

|              |              |              |
|--------------|--------------|--------------|
| 7.605776310  | 10.705832481 | 9.112733841  |
| 9.067817688  | 10.736151695 | 9.041669846  |
| 7.655591965  | 8.218339920  | 9.155916214  |
| 4.923679352  | 13.134688377 | 9.030402184  |
| 9.075843811  | 8.231727600  | 8.986895561  |
| 4.400949955  | 7.019684315  | 11.693069458 |
| 7.005007267  | 2.261290073  | 8.885051727  |
| 5.676836014  | 4.711459160  | 9.266958237  |
| -1.392725706 | 7.102170467  | 8.932157516  |
| 2.854534864  | 4.782589436  | 9.211679459  |
| 1.451933026  | 2.329610348  | 9.091818810  |
| 1.429938316  | 7.164741039  | 9.141300201  |
| -1.284621239 | 2.281248808  | 9.018737793  |
| -2.713245392 | 4.705046654  | 8.890686035  |
| 7.014862537  | 7.028316498  | 9.261989594  |
| 11.197111130 | 4.696573257  | 8.808137894  |
| 9.786505699  | 2.253681183  | 8.805959702  |
| 9.800569534  | 7.103078365  | 8.881649971  |
| 2.765943050  | 9.476799965  | 9.137177467  |
| 1.408211231  | 11.952547073 | 8.931672096  |
| -5.541138172 | 14.353130341 | 9.034559250  |
| -1.370326042 | 11.950242043 | 8.868419647  |
| -2.779983044 | 9.510260582  | 8.867609978  |
| -2.730318069 | 14.324106216 | 8.889570236  |
| 11.125356674 | 9.502954483  | 8.886384010  |
| 9.694552422  | 11.923178673 | 9.031608582  |
| 2.824452400  | 14.295386314 | 8.888724327  |
| 6.963823318  | 11.877064705 | 9.087479591  |
| 5.541377544  | 9.435916901  | 9.206585884  |
| 5.637167931  | 14.270427704 | 9.017855644  |
| 3.285936832  | 7.635605812  | 9.636174202  |
| 5.324206352  | 6.460194588  | 10.155258179 |
| 4.958767414  | 6.733634949  | 12.888396263 |
| 3.299905777  | 7.648820400  | 11.699945450 |
| 4.365396976  | 7.092731476  | 13.593762398 |

C<sub>2</sub>N-CuMn\*CO

| C  | N  | Cu | Mn | O |
|----|----|----|----|---|
| 49 | 24 | 1  | 1  | 1 |

Cartesian

|              |             |             |
|--------------|-------------|-------------|
| -1.409945488 | 4.714057446 | 8.970235825 |
| -0.686761141 | 3.486802578 | 9.025318146 |
| 1.483729124  | 4.758618355 | 9.113168716 |
| 0.773391247  | 3.513318062 | 9.078723907 |

|              |              |             |
|--------------|--------------|-------------|
| -0.699887037 | 5.990887642  | 8.981279373 |
| 5.634988785  | 2.333661556  | 9.030290604 |
| 2.747245312  | 2.361753464  | 9.082768440 |
| 3.478218079  | 3.593366623  | 9.102005005 |
| 4.925714493  | 3.565088511  | 9.089695930 |
| 3.457555294  | 1.086457372  | 9.044480324 |
| 0.724780560  | 6.003565311  | 9.103022575 |
| 4.883271694  | 1.077818155  | 9.002698898 |
| 6.983694553  | 4.675673008  | 9.082338333 |
| 7.649848938  | 3.430800438  | 9.022496223 |
| 9.829675674  | 4.683934689  | 8.984993935 |
| 9.113197327  | 3.442421675  | 8.985530853 |
| 7.696670532  | 5.911147118  | 9.079505920 |
| 13.989929199 | 2.304916382  | 8.973912239 |
| 11.090934753 | 2.305402040  | 8.939628601 |
| 11.803744316 | 3.540396690  | 8.941638947 |
| 13.267103195 | 3.542835712  | 8.942200661 |
| 11.820577621 | 1.037086010  | 8.935791016 |
| 9.107856750  | 5.956994534  | 9.019079208 |
| 13.254097939 | 1.030139446  | 8.969521523 |
| -5.636394501 | 11.936088562 | 8.972785950 |
| -4.917314053 | 10.700110435 | 8.915346146 |
| -2.742888927 | 11.938540459 | 8.862573624 |
| -3.455765009 | 10.703683853 | 8.861331940 |
| -4.900523186 | 13.210393906 | 8.976742744 |
| 1.360613346  | 9.575939178  | 9.034819603 |
| -1.482911587 | 9.560281754  | 8.848638535 |
| -0.766306400 | 10.801820755 | 8.846377373 |
| 0.696393490  | 10.815894127 | 8.903988838 |
| -0.764031887 | 8.286662102  | 8.911615372 |
| -3.470517635 | 13.205934525 | 8.920466423 |
| 0.642188549  | 8.331717491  | 9.039081573 |
| 2.716686249  | 11.908694267 | 8.965614319 |
| 3.418177128  | 10.668823242 | 9.088792801 |
| 5.598817348  | 11.871740341 | 9.060266495 |
| 4.875464439  | 10.633916855 | 9.096386909 |
| 3.467260838  | 13.162235260 | 8.955305099 |
| 9.762170792  | 9.529335022  | 8.991293907 |
| 6.881300449  | 9.488559723  | 9.087078094 |
| 7.582551003  | 10.737410545 | 9.066822052 |
| 9.041899681  | 10.759652138 | 9.031863213 |
| 7.629045486  | 8.248655319  | 9.078598022 |
| 4.891820431  | 13.149714470 | 9.009455681 |
| 9.050338745  | 8.250417709  | 9.019532204 |

|              |              |              |
|--------------|--------------|--------------|
| 4.289223671  | 7.039945602  | 11.321666718 |
| 6.981080055  | 2.272501230  | 9.005517960  |
| 5.617064476  | 4.737966537  | 9.142726898  |
| -1.423957348 | 7.124742031  | 8.902166367  |
| 2.835661650  | 4.782678604  | 9.112967491  |
| 1.415550590  | 2.341992140  | 9.068511963  |
| 1.366151333  | 7.190373421  | 9.184752464  |
| -1.312104106 | 2.300564051  | 9.018084526  |
| 13.891990662 | 4.722477436  | 8.930747986  |
| 6.959189415  | 7.063676357  | 9.134743690  |
| 11.163668633 | 4.713997841  | 8.960149765  |
| 9.754448891  | 2.272443771  | 8.958699226  |
| 9.776327133  | 7.115197659  | 8.998062134  |
| 2.711465359  | 9.520176888  | 9.177011490  |
| 1.372608185  | 11.968421936 | 8.888762474  |
| -5.576025009 | 14.362762451 | 9.035202026  |
| -1.406966686 | 11.972362518 | 8.841407776  |
| -2.817149401 | 9.529902458  | 8.842450142  |
| -2.759988308 | 14.336969376 | 8.937945366  |
| 11.097959518 | 9.519100189  | 8.929534912  |
| 9.667510986  | 11.944665909 | 9.026857376  |
| 2.791196823  | 14.316766739 | 8.919330597  |
| 6.934176445  | 11.900688171 | 9.050222397  |
| 5.530135155  | 9.450973511  | 9.097473145  |
| 5.606554985  | 14.284223557 | 9.007723808  |
| 3.069716454  | 7.763609409  | 10.026150703 |
| 5.039905548  | 6.622231483  | 9.586334229  |
| 4.313068390  | 7.012757778  | 12.508782387 |

C<sub>2</sub>N-CuMn\*CHO

| C  | N  | Cu | Mn | O | H |
|----|----|----|----|---|---|
| 49 | 24 | 1  | 1  | 1 | 1 |

Cartesian

|              |             |             |
|--------------|-------------|-------------|
| -1.472444534 | 4.728593349 | 8.960111618 |
| -0.751842260 | 3.501693010 | 9.041183472 |
| 1.419673443  | 4.776465416 | 9.172871590 |
| 0.709275484  | 3.529231548 | 9.109313965 |
| -0.759127140 | 6.006103516 | 8.978940010 |
| 5.566433430  | 2.349871635 | 8.948105812 |
| 2.682948589  | 2.375810623 | 9.077724457 |
| 3.412973881  | 3.607437849 | 9.122796059 |
| 4.861272335  | 3.579337120 | 9.058877945 |
| 3.390698671  | 1.101629257 | 9.001349449 |
| 0.662330866  | 6.020542622 | 9.148374557 |



|              |              |              |
|--------------|--------------|--------------|
| 4.816041946  | 1.092853308  | 8.927477837  |
| 6.911813259  | 4.693647385  | 8.977518082  |
| 7.579535007  | 3.448676586  | 8.888507843  |
| 9.762134552  | 4.699815750  | 8.851302147  |
| 9.045596123  | 3.458518982  | 8.847018242  |
| 7.624791145  | 5.929410458  | 8.983008385  |
| 13.924741745 | 2.319523096  | 8.962524414  |
| 11.025417328 | 2.319033146  | 8.851158142  |
| 11.738868713 | 3.554896832  | 8.853515625  |
| 13.203498840 | 3.557418585  | 8.892432213  |
| 11.755556107 | 1.049391031  | 8.891550064  |
| 9.037071228  | 5.974040031  | 8.897507668  |
| 13.188161850 | 1.044001579  | 8.963405609  |
| -5.702739239 | 11.949953079 | 8.920169830  |
| -4.983010769 | 10.713671684 | 8.847107887  |
| -2.808240414 | 11.953065872 | 8.787258148  |
| -3.521792173 | 10.716770172 | 8.789544106  |
| -4.966799736 | 13.224941254 | 8.916498184  |
| 1.293157578  | 9.590599060  | 9.048203468  |
| -1.546638250 | 9.572283745  | 8.794152260  |
| -0.829292774 | 10.815323830 | 8.793089867  |
| 0.632349014  | 10.828063011 | 8.878427505  |
| -0.826309204 | 8.300466537  | 8.878751755  |
| -3.536414623 | 13.219797134 | 8.840951920  |
| 0.575787544  | 8.347228050  | 9.047700882  |
| 2.652749062  | 11.917428970 | 8.980560303  |
| 3.350979805  | 10.679446220 | 9.151541710  |
| 5.532188892  | 11.884342194 | 9.117504120  |
| 4.807023525  | 10.645711899 | 9.179874420  |
| 3.402790546  | 13.173755646 | 8.962038040  |
| 9.695045471  | 9.544255257  | 8.940635681  |
| 6.815598488  | 9.502536774  | 9.135305405  |
| 7.517610073  | 10.750461578 | 9.090251923  |
| 8.974975586  | 10.774325371 | 9.012906075  |
| 7.563740730  | 8.261773109  | 9.072396278  |
| 4.825555801  | 13.163422585 | 9.045827866  |
| 8.981328964  | 8.266255379  | 8.962703705  |
| 3.863049984  | 7.274808884  | 11.728457451 |
| 6.912830353  | 2.290701866  | 8.876573563  |
| 5.549424648  | 4.753624439  | 9.091223717  |
| -1.484178066 | 7.135833263  | 8.866098404  |
| 2.773782253  | 4.796510220  | 9.189197540  |
| 1.349240661  | 2.358244181  | 9.079236031  |
| 1.300381184  | 7.212554932  | 9.244170189  |

|              |              |              |
|--------------|--------------|--------------|
| 15.262069702 | 2.315343857  | 9.035657883  |
| 13.830307961 | 4.737398148  | 8.884026527  |
| 6.890945911  | 7.078493595  | 9.101627350  |
| 11.097098351 | 4.729443550  | 8.846298218  |
| 9.687458038  | 2.287618160  | 8.839493752  |
| 9.706403732  | 7.130314350  | 8.891045570  |
| 2.637841702  | 9.530766487  | 9.246294022  |
| 1.311875343  | 11.980374336 | 8.866260529  |
| -5.642640114 | 14.376619339 | 8.993969917  |
| -1.470605850 | 11.986454964 | 8.774855614  |
| -2.881577253 | 9.541776657  | 8.778185844  |
| -2.826762676 | 14.353504181 | 8.845146179  |
| 11.029545784 | 9.532237053  | 8.856054306  |
| 9.601844788  | 11.959710121 | 9.000953674  |
| 2.726933479  | 14.327075958 | 8.883629799  |
| 6.866371632  | 11.914604187 | 9.089909554  |
| 5.466198921  | 9.462749481  | 9.198233604  |
| 5.539982796  | 14.298571587 | 9.039887428  |
| 2.935401917  | 7.814268112  | 10.204596519 |
| 4.993781090  | 6.619330406  | 9.741545677  |
| 4.958095551  | 6.635542393  | 11.796947479 |
| 3.423748493  | 7.532772064  | 12.728699684 |

C<sub>2</sub>N-CuMn\*COOH

| C  | N  | Cu | Mn | O | H |
|----|----|----|----|---|---|
| 49 | 24 | 1  | 1  | 2 | 1 |

Cartesian

|              |             |             |
|--------------|-------------|-------------|
| -1.497612357 | 4.743191242 | 8.983619690 |
| -0.774672270 | 3.517141104 | 9.049878120 |
| 1.399331570  | 4.791495323 | 9.154278755 |
| 0.688492298  | 3.544823647 | 9.097560883 |
| -0.782980204 | 6.020586014 | 9.000251770 |
| 5.543694496  | 2.364728928 | 8.902223587 |
| 2.661317348  | 2.391979218 | 9.042947769 |
| 3.391075850  | 3.623490810 | 9.071567535 |
| 4.837085724  | 3.595865965 | 8.991215706 |
| 3.369807243  | 1.116832495 | 8.972891808 |
| 0.641023397  | 6.033440590 | 9.151559830 |
| 4.794610023  | 1.106860280 | 8.899614334 |
| 6.883567810  | 4.710291862 | 8.902511597 |
| 7.554942131  | 3.465104580 | 8.842122078 |
| 9.737057686  | 4.714917660 | 8.826138496 |
| 9.020777702  | 3.473722219 | 8.824733734 |
| 7.597642422  | 5.947380543 | 8.906076431 |

|              |              |              |
|--------------|--------------|--------------|
| 13.900256157 | 2.335504293  | 8.987921715  |
| 11.000257492 | 2.334250689  | 8.871084213  |
| 11.713668823 | 3.570388079  | 8.871767998  |
| 13.177906036 | 3.573241472  | 8.922599792  |
| 11.730462074 | 1.065213799  | 8.922456741  |
| 9.011670113  | 5.988811016  | 8.847000122  |
| 13.163426399 | 1.058830023  | 8.988462448  |
| -5.722957134 | 11.963211060 | 8.912394524  |
| -5.002154350 | 10.726915359 | 8.848152161  |
| -2.826735973 | 11.965819359 | 8.803350449  |
| -3.540437460 | 10.729436874 | 8.806661606  |
| -4.986643314 | 13.238617897 | 8.909567833  |
| 1.277091503  | 9.603295326  | 9.067319870  |
| -1.565765619 | 9.585181236  | 8.821800232  |
| -0.848045826 | 10.827947617 | 8.819585800  |
| 0.612406254  | 10.840096474 | 8.903987885  |
| -0.845985651 | 8.314457893  | 8.905878067  |
| -3.555726051 | 13.232810020 | 8.842391968  |
| 0.557624817  | 8.356954575  | 9.066401482  |
| 2.630601406  | 11.932300568 | 9.000611305  |
| 3.331069469  | 10.692949295 | 9.155879974  |
| 5.510133743  | 11.896461487 | 9.104435921  |
| 4.785691261  | 10.657614708 | 9.161694527  |
| 3.379785538  | 13.189707756 | 8.984753609  |
| 9.674112320  | 9.558291435  | 8.910036087  |
| 6.792819023  | 9.515851974  | 9.082223892  |
| 7.494846344  | 10.763719559 | 9.052703857  |
| 8.953335762  | 10.787570000 | 8.981891632  |
| 7.539503574  | 8.277005196  | 9.001925468  |
| 4.802932262  | 13.177415848 | 9.053838730  |
| 8.959138870  | 8.280622482  | 8.912969589  |
| 3.869407177  | 7.249763012  | 11.758068085 |
| 6.888844490  | 2.305962563  | 8.838000298  |
| 5.521744251  | 4.771334648  | 8.994779587  |
| -1.506491899 | 7.150071144  | 8.899361610  |
| 2.754388571  | 4.814451218  | 9.144611359  |
| 1.327442527  | 2.373288870  | 9.058571815  |
| 1.281469345  | 7.223147392  | 9.250289917  |
| 15.237935066 | 2.331037045  | 9.050004005  |
| 13.804883003 | 4.753509521  | 8.918891907  |
| 6.863922596  | 7.095959187  | 9.004050255  |
| 11.072063446 | 4.744444847  | 8.841581345  |
| 9.662822723  | 2.302763462  | 8.839241982  |
| 9.682701111  | 7.145142555  | 8.847072601  |

|              |              |              |
|--------------|--------------|--------------|
| 2.620428085  | 9.543663979  | 9.255474091  |
| 1.290950298  | 11.994193077 | 8.896409988  |
| -5.662840843 | 14.390828133 | 8.973702431  |
| -1.489658833 | 11.998934746 | 8.797769547  |
| -2.900688410 | 9.554818153  | 8.803584099  |
| -2.847138405 | 14.367266655 | 8.834309578  |
| 11.009386063 | 9.545911789  | 8.843580246  |
| 9.580944061  | 11.972851753 | 8.978670120  |
| 2.702374458  | 14.342350006 | 8.918603897  |
| 6.844299316  | 11.928308487 | 9.066366196  |
| 5.442962646  | 9.472274780  | 9.153900146  |
| 5.516545296  | 14.313688278 | 9.053423882  |
| 2.883834839  | 7.844818592  | 10.281311989 |
| 4.926221848  | 6.661351681  | 9.584945679  |
| 4.965011120  | 6.607945919  | 11.654784203 |
| 3.420031071  | 7.494368076  | 13.002947807 |
| 4.067364216  | 7.104230881  | 13.641084671 |

C<sub>2</sub>N-NiCo\*CO

| C  | N  | Co | Ni | O |
|----|----|----|----|---|
| 49 | 24 | 1  | 1  | 1 |

Cartesian

|              |             |             |
|--------------|-------------|-------------|
| -1.397432804 | 4.714701653 | 9.014291763 |
| -0.680141687 | 3.484025717 | 9.021329880 |
| 1.485075951  | 4.760599136 | 8.982684135 |
| 0.777673483  | 3.512155056 | 9.015066147 |
| -0.681286812 | 5.998927116 | 9.012815475 |
| 5.638241768  | 2.343286037 | 9.026891708 |
| 2.756978989  | 2.372380972 | 9.023237228 |
| 3.481779099  | 3.609656811 | 9.005723953 |
| 4.933379650  | 3.590188265 | 9.046332359 |
| 3.462748528  | 1.092233658 | 9.023903847 |
| 0.751228571  | 6.008971214 | 8.999657631 |
| 4.887625694  | 1.085186958 | 9.014273643 |
| 6.990478039  | 4.673055172 | 9.095327377 |
| 7.655230045  | 3.427608490 | 9.050760269 |
| 9.836638451  | 4.679626465 | 9.036144257 |
| 9.119925499  | 3.438200235 | 9.035675049 |
| 7.702847481  | 5.906843662 | 9.095454216 |
| 13.996875763 | 2.301826954 | 9.025956154 |
| 11.098307610 | 2.298815012 | 9.022734642 |
| 11.812150955 | 3.535644293 | 9.023633957 |
| 13.276546478 | 3.541192293 | 9.022518158 |
| 11.825734138 | 1.027559042 | 9.019835472 |

|              |              |              |
|--------------|--------------|--------------|
| 9.113855362  | 5.953793049  | 9.051300049  |
| 13.259263992 | 1.023711443  | 9.024623871  |
| -5.637320042 | 11.935989380 | 9.025415421  |
| -4.917907715 | 10.696105957 | 9.021545410  |
| -2.738778591 | 11.936738968 | 9.025506020  |
| -3.452637911 | 10.701062202 | 9.028241158  |
| -4.900724411 | 13.211396217 | 9.023670197  |
| 1.362395763  | 9.562182426  | 9.051227570  |
| -1.478149414 | 9.556893349  | 9.044495583  |
| -0.761203289 | 10.797685623 | 9.042965889  |
| 0.704257965  | 10.808854103 | 9.043470383  |
| -0.755906105 | 8.281818390  | 9.044604301  |
| -3.467168808 | 13.208226204 | 9.017208099  |
| 0.652803898  | 8.334561348  | 9.051389694  |
| 2.719000816  | 11.885335922 | 9.012167931  |
| 3.426001072  | 10.639226913 | 9.000089645  |
| 5.600820065  | 11.866602898 | 9.014543533  |
| 4.874181747  | 10.629053116 | 8.983763695  |
| 3.472544670  | 13.148680687 | 9.012257576  |
| 9.758060455  | 9.522322655  | 9.017675400  |
| 6.869827747  | 9.476799965  | 9.007452011  |
| 7.578261852  | 10.723399162 | 9.024137497  |
| 9.039587975  | 10.752854347 | 9.025289536  |
| 7.612403870  | 8.229623795  | 9.047736168  |
| 4.896773338  | 13.143507004 | 9.019475937  |
| 9.044444084  | 8.242766380  | 9.028907776  |
| 4.029972076  | 7.208909512  | 10.888775826 |
| 6.981778145  | 2.274057627  | 9.030726433  |
| 5.628646374  | 4.752932549  | 9.118116379  |
| -1.418741941 | 7.121725559  | 9.033893585  |
| 2.829267502  | 4.787100315  | 8.943120003  |
| 1.425251007  | 2.347638130  | 9.015011787  |
| 1.422682762  | 7.200191021  | 9.043704033  |
| -1.305920362 | 2.297042608  | 9.025919914  |
| 13.904056549 | 4.722296238  | 9.015930176  |
| 6.952704906  | 7.046343803  | 9.118097305  |
| 11.170920372 | 4.708850861  | 9.027162552  |
| 9.761580467  | 2.267861128  | 9.025775909  |
| 9.776166916  | 7.113785267  | 9.032274246  |
| 2.729794025  | 9.461826324  | 9.043722153  |
| 1.378017902  | 11.962533951 | 9.032400131  |
| -5.573011398 | 14.370033264 | 9.026477814  |
| -1.402599335 | 11.967924118 | 9.031715393  |
| -2.812198400 | 9.527956963  | 9.035927773  |

|              |              |              |
|--------------|--------------|--------------|
| -2.756875992 | 14.338920593 | 9.009036064  |
| 11.097735405 | 9.515692711  | 9.014453888  |
| 9.662704468  | 11.938943863 | 9.027287483  |
| 2.796704292  | 14.303903580 | 9.013049126  |
| 6.933064461  | 11.888578415 | 9.014183044  |
| 5.524230003  | 9.452387810  | 8.944883347  |
| 5.611965179  | 14.278944969 | 9.024605751  |
| 3.245368958  | 7.653676987  | 9.283499718  |
| 5.106871605  | 6.583375931  | 9.464814186  |
| 3.980726242  | 7.242212296  | 12.071105957 |

C<sub>2</sub>N- NiCo \*CHO

| C  | N  | Co | Ni | O | H |
|----|----|----|----|---|---|
| 49 | 24 | 1  | 1  | 1 | 1 |

Cartesian

|              |              |             |
|--------------|--------------|-------------|
| -1.446726322 | 4.657736778  | 9.075870514 |
| -0.721631169 | 3.428300142  | 9.097919464 |
| 1.433161736  | 4.713130951  | 9.160794258 |
| 0.742390037  | 3.460320234  | 9.116603851 |
| -0.740713835 | 5.950204849  | 9.114624023 |
| 5.616002083  | 2.364080429  | 9.017730713 |
| 2.743384838  | 2.357451677  | 9.066383362 |
| 3.445853949  | 3.608504295  | 9.081665993 |
| 4.913470268  | 3.616775751  | 9.037241936 |
| 3.466525555  | 1.088861704  | 9.029034615 |
| 0.681950331  | 5.950479031  | 9.207953453 |
| 4.889372826  | 1.092392206  | 9.022193909 |
| 6.938587189  | 4.708461761  | 8.966861725 |
| 7.622148991  | 3.455103636  | 8.968788147 |
| 9.815905571  | 4.656252384  | 8.901539803 |
| 9.089218140  | 3.425994396  | 8.952300072 |
| 7.693030357  | 5.935837746  | 8.914086342 |
| 13.957572937 | 2.240380287  | 9.060534477 |
| 11.049863815 | 2.238679886  | 9.005795479 |
| 11.771651268 | 3.473304272  | 8.973341942 |
| 13.236322403 | 3.473678827  | 9.018989563 |
| 11.782271385 | 0.961241663  | 9.056610107 |
| 9.112915993  | 5.942481041  | 8.861886024 |
| 13.220319748 | 0.958532512  | 9.067734718 |
| -5.595979214 | 11.940644264 | 8.927909851 |
| -4.872024536 | 10.714046478 | 8.901377678 |
| -2.693377018 | 11.941969872 | 9.008225441 |
| -3.418734789 | 10.714565277 | 8.961192131 |
| -4.861537457 | 13.212576866 | 8.973845482 |

|              |              |              |
|--------------|--------------|--------------|
| 1.362589359  | 9.489883423  | 9.233909607  |
| -1.478971481 | 9.528720856  | 9.058824539  |
| -0.740061760 | 10.759108543 | 9.094320297  |
| 0.717247009  | 10.738400459 | 9.160919189  |
| -0.789617538 | 8.242420197  | 9.111401558  |
| -3.426060200 | 13.214407921 | 8.998038292  |
| 0.615899086  | 8.271212578  | 9.225594521  |
| 2.738255501  | 11.796365738 | 9.171540260  |
| 3.454540730  | 10.541666985 | 9.212867737  |
| 5.610148907  | 11.798801422 | 9.067986488  |
| 4.897837162  | 10.541220665 | 9.105245590  |
| 3.469176769  | 13.074422836 | 9.122345924  |
| 9.825567245  | 9.528230667  | 8.837081909  |
| 6.974790573  | 9.479969978  | 8.926145554  |
| 7.629295826  | 10.730863571 | 8.934065819  |
| 9.089248657  | 10.756528854 | 8.890811920  |
| 7.723122597  | 8.264324188  | 8.869733810  |
| 4.888105869  | 13.071858406 | 9.096443176  |
| 9.132675171  | 8.238140106  | 8.820467949  |
| 4.507347584  | 7.537224770  | 11.095685959 |
| 6.953856468  | 2.305328846  | 8.993105888  |
| 5.588876724  | 4.782128811  | 9.013157845  |
| -1.463393450 | 7.082571983  | 9.079038620  |
| 2.776436806  | 4.767444134  | 9.126288414  |
| 1.406989932  | 2.308628559  | 9.074016571  |
| 1.344985008  | 7.131957054  | 9.324485779  |
| 15.295359612 | 2.241144180  | 9.092754364  |
| 13.858364105 | 4.657361984  | 9.029988289  |
| 7.010866165  | 7.105614662  | 8.931726456  |
| 11.153599739 | 4.655531883  | 8.913275719  |
| 9.708642006  | 2.240149736  | 8.995229721  |
| 9.823066711  | 7.087053299  | 8.815842628  |
| 2.731152058  | 9.364771843  | 9.331056595  |
| 1.407105923  | 11.886273384 | 9.164033890  |
| -5.551421165 | 14.356502533 | 8.997983932  |
| -1.358395100 | 11.946465492 | 9.068094254  |
| -2.807464361 | 9.528346062  | 8.987832069  |
| -2.734488010 | 14.358072281 | 9.015048027  |
| -5.482993603 | 9.527034760  | 8.842140198  |
| 9.705410004  | 11.944837570 | 8.923391342  |
| 2.774891853  | 14.221359253 | 9.092681885  |
| 6.944529533  | 11.874370575 | 8.993771553  |
| 5.612497807  | 9.378908157  | 9.007487297  |
| 5.585627556  | 14.222656250 | 9.079938889  |

|             |             |              |
|-------------|-------------|--------------|
| 3.068564415 | 7.655910015 | 9.989999771  |
| 5.187453747 | 7.428469181 | 9.242244720  |
| 3.731389999 | 6.580983639 | 11.463461876 |
| 5.196664810 | 8.026376724 | 11.809278488 |

C<sub>2</sub>N- NiCo \*COOH

| C            | N  | Co | Ni           | O | H           |
|--------------|----|----|--------------|---|-------------|
| 49           | 24 | 1  | 1            | 2 | 1           |
| Cartesian    |    |    |              |   |             |
| -1.399794579 |    |    | 4.676974773  |   | 9.043326378 |
| -0.679857850 |    |    | 3.448114634  |   | 9.084456444 |
| 1.487589836  |    |    | 4.717079163  |   | 9.144180298 |
| 0.780386686  |    |    | 3.470623970  |   | 9.130356789 |
| -0.681967974 |    |    | 5.959298134  |   | 9.048510551 |
| 5.643750191  |    |    | 2.305040359  |   | 9.035496712 |
| 2.759500504  |    |    | 2.330489635  |   | 9.130266190 |
| 3.486206532  |    |    | 3.567462683  |   | 9.140687943 |
| 4.936525822  |    |    | 3.542489290  |   | 9.107478142 |
| 3.469388485  |    |    | 1.051567078  |   | 9.083429337 |
| 0.745105982  |    |    | 5.962050438  |   | 9.113346100 |
| 4.893750191  |    |    | 1.042791009  |   | 9.034235954 |
| 6.984847069  |    |    | 4.638628483  |   | 9.037836075 |
| 7.653159142  |    |    | 3.397504568  |   | 8.980451584 |
| 9.833578110  |    |    | 4.650171280  |   | 8.954099655 |
| 9.118086815  |    |    | 3.408038855  |   | 8.950265884 |
| 7.698971748  |    |    | 5.881019592  |   | 9.017009735 |
| 13.994155884 |    |    | 2.275354624  |   | 9.019871712 |
| 11.097318649 |    |    | 2.272227526  |   | 8.953091621 |
| 11.809131622 |    |    | 3.507385015  |   | 8.963478088 |
| 13.273261070 |    |    | 3.511232615  |   | 8.992746353 |
| 11.826399803 |    |    | 1.003723979  |   | 8.962937355 |
| 9.108572960  |    |    | 5.922940254  |   | 8.974295616 |
| 13.256901741 |    |    | 0.998493016  |   | 8.996706009 |
| -5.621861458 |    |    | 11.895467758 |   | 9.008262634 |
| -4.903188705 |    |    | 10.658133507 |   | 8.979084015 |
| -2.724567413 |    |    | 11.897196770 |   | 8.961425781 |
| -3.437810421 |    |    | 10.660626411 |   | 8.962920189 |
| -4.885214806 |    |    | 13.172574043 |   | 9.022356033 |
| 1.391174316  |    |    | 9.526025772  |   | 9.010278702 |
| -1.461009026 |    |    | 9.517724991  |   | 8.959770203 |
| -0.745336056 |    |    | 10.758531570 |   | 8.949348450 |
| 0.719309807  |    |    | 10.767999649 |   | 8.958618164 |
| -0.736611366 |    |    | 8.245114326  |   | 8.993574142 |
| -3.455121040 |    |    | 13.167530060 |   | 8.988156319 |



|              |              |              |
|--------------|--------------|--------------|
| 0.673355579  | 8.286054611  | 9.043722153  |
| 2.726895809  | 11.863936424 | 8.965979576  |
| 3.437132835  | 10.624412537 | 9.006875992  |
| 5.613783360  | 11.845361710 | 9.010368347  |
| 4.889407158  | 10.609454155 | 9.014183044  |
| 3.478892803  | 13.128059387 | 8.965638161  |
| 9.769849777  | 9.490748405  | 8.993160248  |
| 6.880826950  | 9.451783180  | 9.026909828  |
| 7.589986324  | 10.699809074 | 9.026280403  |
| 9.051677704  | 10.721655846 | 9.017495155  |
| 7.623727322  | 8.204246521  | 9.033390045  |
| 4.903920650  | 13.120004654 | 8.995103836  |
| 9.050526619  | 8.209722519  | 8.997786522  |
| 4.689476013  | 7.219213486  | 11.399417877 |
| 6.984923363  | 2.237570286  | 8.989379883  |
| 5.625436306  | 4.713361263  | 9.162125587  |
| -1.407917023 | 7.085684776  | 9.004788399  |
| 2.835325241  | 4.751448154  | 9.147384644  |
| 1.426782608  | 2.304406404  | 9.127547264  |
| 1.419089794  | 7.146122456  | 9.147438049  |
| 15.329811096 | 2.264013529  | 9.067824364  |
| 13.904314995 | 4.690491676  | 9.000018120  |
| 6.949002266  | 7.023214817  | 9.068039894  |
| 11.168259621 | 4.680980682  | 8.958563805  |
| 9.760115623  | 2.238463640  | 8.944992065  |
| 9.779420853  | 7.081894875  | 8.968266487  |
| 2.752715588  | 9.449072838  | 9.051876068  |
| 1.387752533  | 11.928121567 | 8.943426132  |
| -5.562044144 | 14.325532913 | 9.071387291  |
| -1.388471127 | 11.928812981 | 8.947656631  |
| -2.796181679 | 9.488370895  | 8.959464073  |
| -2.748014450 | 14.302246094 | 8.990316391  |
| 11.106771469 | 9.478946686  | 8.973252296  |
| 9.681043625  | 11.905338287 | 9.024948120  |
| 2.799642563  | 14.278122902 | 8.948160172  |
| 6.947591305  | 11.866645813 | 9.014993668  |
| 5.533399105  | 9.429907799  | 9.015858650  |
| 5.614429474  | 14.257674217 | 9.010746002  |
| 3.260271072  | 7.611410141  | 9.558449745  |
| 5.236181259  | 6.489793777  | 9.813276291  |
| 5.470716476  | 7.160144329  | 12.504384041 |
| 3.567791939  | 7.826286316  | 11.521548271 |
| 4.992374420  | 7.624322891  | 13.232430458 |

C<sub>2</sub>N-NiFe\*CO

| C            | N  | Fe | Ni           | O           |
|--------------|----|----|--------------|-------------|
| 49           | 24 | 1  | 1            | 1           |
| Cartesian    |    |    |              |             |
| -1.401509404 |    |    | 4.713260651  | 9.008855820 |
| -0.682271481 |    |    | 3.483535767  | 9.017135620 |
| 1.478986025  |    |    | 4.760627747  | 8.995553970 |
| 0.776342154  |    |    | 3.511059761  | 9.015048027 |
| -0.686594963 |    |    | 5.998667717  | 9.007991791 |
| 5.637801170  |    |    | 2.345288992  | 9.032327652 |
| 2.757835865  |    |    | 2.376660824  | 9.028727531 |
| 3.481945038  |    |    | 3.614470005  | 9.027881622 |
| 4.933446407  |    |    | 3.589842319  | 9.066114426 |
| 3.462123871  |    |    | 1.094986081  | 9.026153564 |
| 0.740220547  |    |    | 6.001780510  | 9.004212379 |
| 4.885945320  |    |    | 1.084639311  | 9.016937256 |
| 6.995461464  |    |    | 4.669034481  | 9.097667694 |
| 7.656636238  |    |    | 3.425806999  | 9.043344498 |
| 9.838775635  |    |    | 4.678343773  | 9.024479866 |
| 9.121872902  |    |    | 3.436557293  | 9.023544312 |
| 7.708514214  |    |    | 5.903889179  | 9.097811699 |
| 13.995834351 |    |    | 2.302763462  | 9.019242287 |
| 11.099580765 |    |    | 2.299578905  | 9.011303902 |
| 11.812334061 |    |    | 3.534433842  | 9.012942314 |
| 13.275531769 |    |    | 3.539232492  | 9.013733864 |
| 11.826948166 |    |    | 1.029951215  | 9.010350227 |
| 9.115785599  |    |    | 5.952842236  | 9.044388771 |
| 13.257973671 |    |    | 1.024532914  | 9.017208099 |
| -5.639924526 |    |    | 11.934649467 | 9.021311760 |
| -4.918556213 |    |    | 10.697027206 | 9.016650200 |
| -2.739843369 |    |    | 11.936422348 | 9.015516281 |
| -3.452903509 |    |    | 10.701090813 | 9.019188881 |
| -4.901647568 |    |    | 13.213370323 | 9.019835472 |
| 1.362179756  |    |    | 9.564112663  | 9.041058540 |
| -1.477657795 |    |    | 9.556619644  | 9.030833244 |
| -0.760945320 |    |    | 10.798074722 | 9.027881622 |
| 0.704141617  |    |    | 10.809286118 | 9.029772758 |
| -0.754933357 |    |    | 8.282034874  | 9.032976151 |
| -3.469115734 |    |    | 13.207707405 | 9.011879921 |
| 0.652379513  |    |    | 8.334662437  | 9.042174339 |
| 2.715905666  |    |    | 11.891850471 | 9.004571915 |
| 3.426382065  |    |    | 10.654646873 | 9.002105713 |
| 5.601052761  |    |    | 11.868850708 | 9.012528419 |
| 4.870512962  |    |    | 10.635378838 | 8.994312286 |

|              |              |              |
|--------------|--------------|--------------|
| 3.471538067  | 13.153882980 | 9.004517555  |
| 9.757570267  | 9.523143768  | 9.019926071  |
| 6.864794254  | 9.474076271  | 9.028134346  |
| 7.574452877  | 10.720257759 | 9.028152466  |
| 9.036460876  | 10.751038551 | 9.026622772  |
| 7.612045288  | 8.229522705  | 9.066959381  |
| 4.896032810  | 13.146029472 | 9.013086319  |
| 9.041931152  | 8.241612434  | 9.034235954  |
| 4.027950287  | 7.208866596  | 10.922993660 |
| 6.981277943  | 2.271752119  | 9.027125359  |
| 5.634237289  | 4.752558231  | 9.143135071  |
| -1.423018456 | 7.121811867  | 9.024372101  |
| 2.826804399  | 4.795228004  | 8.977157593  |
| 1.424951196  | 2.348128080  | 9.014345169  |
| 1.419179916  | 7.192423344  | 9.045989990  |
| -1.307376266 | 2.296480656  | 9.021581650  |
| 13.901950836 | 4.721388340  | 9.008118629  |
| 6.955757618  | 7.041170597  | 9.143316269  |
| 11.172185898 | 4.708879948  | 9.015605927  |
| 9.762178421  | 2.266679764  | 9.013031960  |
| 9.777356148  | 7.114808559  | 9.029141426  |
| 2.734685421  | 9.471366882  | 9.044639587  |
| 1.374981403  | 11.967908859 | 9.019889832  |
| -5.573660851 | 14.371099472 | 9.025181770  |
| -1.403406143 | 11.967967033 | 9.018719673  |
| -2.812148571 | 9.528043747  | 9.025271416  |
| -2.758847713 | 14.340117455 | 9.006515503  |
| 11.095530510 | 9.515649796  | 9.012311935  |
| 9.661182404  | 11.937978745 | 9.025271416  |
| 2.796297073  | 14.307088852 | 9.003761292  |
| 6.932573795  | 11.888650894 | 9.012078285  |
| 5.514646530  | 9.450975418  | 8.976798058  |
| 5.611583710  | 14.280788422 | 9.018737793  |
| 3.266243935  | 7.646053791  | 9.268434525  |
| 5.120068073  | 6.576112747  | 9.500904083  |
| 4.011635780  | 7.220351219  | 12.107520103 |

C<sub>2</sub>N- NiFe \*CHO

| C  | N  | Fe | Ni | O | H |
|----|----|----|----|---|---|
| 49 | 24 | 1  | 1  | 1 | 1 |

Cartesian

|              |             |             |
|--------------|-------------|-------------|
| -1.457708478 | 4.655632496 | 9.058608055 |
| -0.727754593 | 3.427464247 | 9.087911606 |
| 1.417720079  | 4.718491554 | 9.166374207 |

|              |              |             |
|--------------|--------------|-------------|
| 0.735626101  | 3.463793278  | 9.114137650 |
| -0.760373592 | 5.947452545  | 9.102527618 |
| 5.612524033  | 2.380133867  | 9.033227921 |
| 2.744765282  | 2.376415968  | 9.076608658 |
| 3.445187807  | 3.631935596  | 9.101754189 |
| 4.912928581  | 3.636763096  | 9.055206299 |
| 3.467165709  | 1.105217576  | 9.035874367 |
| 0.656075716  | 5.943964958  | 9.209177971 |
| 4.887683868  | 1.107681751  | 9.033803940 |
| 6.946532249  | 4.716516972  | 8.964918137 |
| 7.623963356  | 3.460925579  | 8.970191956 |
| 9.822437286  | 4.652692795  | 8.879796028 |
| 9.090048790  | 3.425965548  | 8.945190430 |
| 7.709595203  | 5.936774731  | 8.904941559 |
| 13.956075668 | 2.232685089  | 9.051462173 |
| 11.046152115 | 2.230811834  | 8.999586105 |
| 11.771018982 | 3.462208033  | 8.956835747 |
| 13.232994080 | 3.464023829  | 9.003582001 |
| 11.779910088 | 0.951961279  | 9.050651550 |
| 9.126635551  | 5.943158150  | 8.840826035 |
| 13.219138145 | 0.952076614  | 9.059418678 |
| -5.596470356 | 11.953484535 | 8.925731659 |
| -4.869021416 | 10.728759766 | 8.896391869 |
| -2.690681934 | 11.953469276 | 9.016775131 |
| -3.418726683 | 10.728240967 | 8.961011887 |
| -4.862328529 | 13.226627350 | 8.976870537 |
| 1.361424446  | 9.477375984  | 9.232722282 |
| -1.485694408 | 9.533736229  | 9.060696602 |
| -0.741467476 | 10.760621071 | 9.101736069 |
| 0.716881275  | 10.731598854 | 9.162576675 |
| -0.802055120 | 8.242520332  | 9.115236282 |
| -3.425096512 | 13.227838516 | 9.006948471 |
| 0.603061676  | 8.271399498  | 9.240263939 |
| 2.744121075  | 11.786725044 | 9.154062271 |
| 3.459856033  | 10.533900261 | 9.185184479 |
| 5.612269402  | 11.792705536 | 9.053459167 |
| 4.899018288  | 10.534649849 | 9.084797859 |
| 3.469376564  | 13.064884186 | 9.108953476 |
| 9.834760666  | 9.534038544  | 8.825993538 |
| 6.981787205  | 9.477418900  | 8.920025826 |
| 7.633380413  | 10.729004860 | 8.924958229 |
| 9.092584610  | 10.760204315 | 8.882351875 |
| 7.739378452  | 8.266111374  | 8.873819351 |
| 4.887881279  | 13.066021919 | 9.083033562 |

|              |              |              |
|--------------|--------------|--------------|
| 9.147768021  | 8.241166115  | 8.810766220  |
| 4.521408558  | 7.491399765  | 11.162088394 |
| 6.949529648  | 2.315214157  | 8.999351501  |
| 5.595890045  | 4.799118519  | 9.014885902  |
| -1.480408192 | 7.087140083  | 9.073872566  |
| 2.764796972  | 4.790457726  | 9.145782471  |
| 1.408736587  | 2.317390442  | 9.074501991  |
| 1.316648006  | 7.120255470  | 9.357083321  |
| 15.294635773 | 2.237671137  | 9.085914612  |
| 13.848333359 | 4.650646687  | 9.009143829  |
| 7.034520149  | 7.106608868  | 8.950697899  |
| 11.157734871 | 4.646899700  | 8.887499809  |
| 9.705529213  | 2.237181187  | 8.995590210  |
| 9.837177277  | 7.088321686  | 8.798850060  |
| 2.735346317  | 9.353329659  | 9.288827896  |
| 1.409086704  | 11.874859810 | 9.150083542  |
| -5.551188469 | 14.372295380 | 8.998505592  |
| -1.355159283 | 11.952388763 | 9.080388069  |
| -2.812173843 | 9.537943840  | 8.984736443  |
| -2.735419750 | 14.372483253 | 9.026280403  |
| -5.475755692 | 9.539024353  | 8.832564354  |
| 9.704968452  | 11.951539040 | 8.919666290  |
| 2.773003578  | 14.213274956 | 9.082026482  |
| 6.944488049  | 11.873173714 | 8.980793953  |
| 5.617497921  | 9.368374825  | 8.990081787  |
| 5.584979057  | 14.215652466 | 9.066743851  |
| 3.097037315  | 7.560886860  | 9.944856644  |
| 5.223087311  | 7.434852600  | 9.321660042  |
| 3.691612720  | 6.593679428  | 11.564027786 |
| 5.184226990  | 8.002642632  | 11.886354446 |

C<sub>2</sub>N- NiFe \*COOH

| C  | N  | Fe | Ni | O | H |
|----|----|----|----|---|---|
| 49 | 24 | 1  | 1  | 2 | 1 |

Cartesian

|              |             |             |
|--------------|-------------|-------------|
| -1.389228463 | 4.686629772 | 9.059345245 |
| -0.675040722 | 3.454440594 | 9.079848289 |
| 1.492914915  | 4.719326973 | 9.143837929 |
| 0.786992550  | 3.471200228 | 9.119502068 |
| -0.666301727 | 5.965191841 | 9.065897942 |
| 5.646829128  | 2.297229767 | 9.020627975 |
| 2.763519287  | 2.326872349 | 9.109169960 |
| 3.485465527  | 3.561511278 | 9.134495735 |
| 4.937017441  | 3.531868696 | 9.105659485 |

|              |              |              |
|--------------|--------------|--------------|
| 3.472358704  | 1.049218178  | 9.058247566  |
| 0.760771990  | 5.963880539  | 9.117018700  |
| 4.897119999  | 1.035686612  | 9.009899139  |
| 6.980030060  | 4.638354301  | 9.063467026  |
| 7.656787395  | 3.398427010  | 8.993789673  |
| 9.832404137  | 4.658457279  | 8.988552094  |
| 9.121282578  | 3.415503502  | 8.965908051  |
| 7.689578533  | 5.890026569  | 9.049446106  |
| 13.997257233 | 2.287877560  | 9.008316040  |
| 11.102758408 | 2.286177158  | 8.947296143  |
| 11.813631058 | 3.523308992  | 8.980451584  |
| 13.279983521 | 3.526190758  | 9.005075455  |
| 11.832455635 | 1.017587066  | 8.936190605  |
| 9.102615356  | 5.929396152  | 9.013715744  |
| 13.261343956 | 1.013105273  | 8.969885826  |
| -5.620064259 | 11.890740395 | 8.993142128  |
| -4.898129940 | 10.652657509 | 8.977355957  |
| -2.719657898 | 11.892382622 | 8.942057610  |
| -3.431005001 | 10.653334618 | 8.958906174  |
| -4.881995201 | 13.169244766 | 9.003221512  |
| 1.400526047  | 9.534729958  | 8.978706360  |
| -1.447988510 | 9.515520096  | 8.956133842  |
| -0.736250877 | 10.760059357 | 8.922978401  |
| 0.724750519  | 10.774888039 | 8.918640137  |
| -0.718150139 | 8.249711990  | 8.998811722  |
| -3.451326370 | 13.160901070 | 8.967473984  |
| 0.694670677  | 8.291185379  | 9.031661987  |
| 2.726803780  | 11.885048866 | 8.914770126  |
| 3.443505287  | 10.654933929 | 8.967222214  |
| 5.619681835  | 11.860103607 | 8.971037865  |
| 4.885238171  | 10.631430626 | 8.990495682  |
| 3.480682373  | 13.144530296 | 8.917829514  |
| 9.768644333  | 9.492838860  | 8.998235703  |
| 6.870061398  | 9.459880829  | 9.028962135  |
| 7.587207317  | 10.701479912 | 9.005022049  |
| 9.048474312  | 10.721237183 | 9.002214432  |
| 7.615465641  | 8.211726189  | 9.048527718  |
| 4.906949043  | 13.136547089 | 8.949906349  |
| 9.044219971  | 8.216380119  | 9.017009735  |
| 4.639799595  | 7.148932457  | 11.510280609 |
| 6.988950253  | 2.240279436  | 8.981441498  |
| 5.625577927  | 4.696313858  | 9.180450439  |
| -1.392376184 | 7.089863777  | 9.023345947  |
| 2.843012571  | 4.748508453  | 9.157392502  |

|              |              |              |
|--------------|--------------|--------------|
| 1.426308513  | 2.304046154  | 9.108756065  |
| 1.445954323  | 7.147923946  | 9.128862381  |
| -1.306177616 | 2.273164511  | 9.049482346  |
| 13.912876129 | 4.703562260  | 9.026244164  |
| 6.942013264  | 7.032092094  | 9.087515831  |
| 11.167601585 | 4.693474770  | 8.994438171  |
| 9.767420769  | 2.248407125  | 8.939016342  |
| 9.769711494  | 7.086894989  | 9.000089645  |
| 2.766018391  | 9.472692490  | 9.012311935  |
| 1.387395382  | 11.943180084 | 8.888112068  |
| -5.558916569 | 14.321383476 | 9.048888206  |
| -1.384543896 | 11.928697586 | 8.915867805  |
| -2.785565615 | 9.483155251  | 8.965403557  |
| -2.744636536 | 14.296799660 | 8.966033936  |
| 11.105440140 | 9.475805283  | 8.982810020  |
| 9.683156013  | 11.904272079 | 9.001044273  |
| 2.802961349  | 14.296178818 | 8.908091545  |
| 6.949620724  | 11.876906395 | 8.982810020  |
| 5.519888401  | 9.440196991  | 9.031967163  |
| 5.618556023  | 14.270960808 | 8.972802162  |
| 3.367720604  | 7.640880585  | 9.533267975  |
| 5.283846378  | 6.445942402  | 9.949031830  |
| 5.320605755  | 7.022941113  | 12.674861908 |
| 3.542873383  | 7.811198711  | 11.559455872 |
| 4.805056572  | 7.496860981  | 13.371191978 |

C<sub>2</sub>N-NiMn\*CO

| C  | N  | Ni | Mn | O |
|----|----|----|----|---|
| 49 | 24 | 1  | 1  | 1 |

Cartesian

|              |             |             |
|--------------|-------------|-------------|
| -1.403913856 | 4.712496758 | 8.994689941 |
| -0.681131721 | 3.486345768 | 9.028854370 |
| 1.493429184  | 4.759994030 | 9.079056740 |
| 0.781974554  | 3.513005257 | 9.053063393 |
| -0.686336756 | 5.992139816 | 9.011754990 |
| 5.637451172  | 2.333385944 | 8.996075630 |
| 2.753135681  | 2.358863831 | 9.033102036 |
| 3.482810974  | 3.589164972 | 9.033732414 |
| 4.927615166  | 3.565531731 | 9.019008636 |
| 3.462340832  | 1.083313584 | 9.008711815 |
| 0.742002010  | 5.999964714 | 9.111078262 |
| 4.888449669  | 1.074162841 | 8.984268188 |
| 6.970910072  | 4.681758881 | 9.017910004 |
| 7.645080090  | 3.436542749 | 8.997371674 |

|              |              |              |
|--------------|--------------|--------------|
| 9.825715065  | 4.684741974  | 8.985744476  |
| 9.110457420  | 3.444166183  | 8.986410141  |
| 7.683163643  | 5.917593956  | 9.017064095  |
| 13.992540359 | 2.306308508  | 9.000395775  |
| 11.090428352 | 2.305141211  | 8.972009659  |
| 11.803463936 | 3.541696787  | 8.971721649  |
| 13.269109726 | 3.543815136  | 8.975753784  |
| 11.821840286 | 1.035254359  | 8.976779938  |
| 9.098606110  | 5.957064152  | 8.995391846  |
| 13.255111694 | 1.027818441  | 8.999910355  |
| -5.629990578 | 11.930701256 | 8.966825485  |
| -4.909595490 | 10.693784714 | 8.935631752  |
| -2.734052181 | 11.932674408 | 8.912015915  |
| -3.447379589 | 10.696624756 | 8.910180092  |
| -4.893768311 | 13.205948830 | 8.969346046  |
| 1.373901844  | 9.569286346  | 9.096570015  |
| -1.472483158 | 9.553564072  | 8.923212051  |
| -0.755844593 | 10.795724869 | 8.923986435  |
| 0.705090046  | 10.807066917 | 8.977913857  |
| -0.750998020 | 8.283374786  | 8.977716446  |
| -3.462534428 | 13.200112343 | 8.940024376  |
| 0.655358791  | 8.323536873  | 9.096822739  |
| 2.722095013  | 11.897383690 | 9.011123657  |
| 3.429452419  | 10.657024384 | 9.109674454  |
| 5.603466511  | 11.864989281 | 9.049139977  |
| 4.878857613  | 10.625824928 | 9.076499939  |
| 3.472186089  | 13.158465385 | 8.994113922  |
| 9.766304970  | 9.525190353  | 8.977428436  |
| 6.885735989  | 9.485762596  | 9.029610634  |
| 7.587197304  | 10.732622147 | 9.028043747  |
| 9.046153069  | 10.755779266 | 9.002825737  |
| 7.627378464  | 8.245215416  | 9.015011787  |
| 4.895740509  | 13.145755768 | 9.025848389  |
| 9.049584389  | 8.247089386  | 8.990766525  |
| 3.958337784  | 7.245137691  | 11.461950302 |
| 6.982867241  | 2.274389267  | 8.988696098  |
| 5.605792046  | 4.747096539  | 9.037206650  |
| -1.413392782 | 7.119001865  | 8.960003853  |
| 2.847670794  | 4.782171726  | 9.044909477  |
| 1.419493675  | 2.340778589  | 9.032256126  |
| 1.393487930  | 7.187466621  | 9.225179672  |
| -1.309522748 | 2.300544262  | 9.027090073  |
| 13.898597717 | 4.723506451  | 8.967240334  |
| 6.943036079  | 7.066835880  | 9.034343719  |



|              |              |              |
|--------------|--------------|--------------|
| 11.161053658 | 4.715076447  | 8.977193832  |
| 9.753051758  | 2.273380518  | 8.977733612  |
| 9.773496628  | 7.111609459  | 8.984448433  |
| 2.726856232  | 9.499539375  | 9.224603653  |
| 1.382401943  | 11.963009834 | 8.959824562  |
| -5.570732117 | 14.358620644 | 9.002555847  |
| -1.397265911 | 11.966295242 | 8.909387589  |
| -2.807198048 | 9.522726059  | 8.907030106  |
| -2.752932549 | 14.333733559 | 8.949545860  |
| 11.102487564 | 9.512537003  | 8.942957878  |
| 9.673112869  | 11.940715790 | 8.998271942  |
| 2.794466019  | 14.311122894 | 8.968391418  |
| 6.937323570  | 11.897253990 | 9.027107239  |
| 5.535221577  | 9.441450119  | 9.042119980  |
| 5.608828545  | 14.282705307 | 9.024551392  |
| 3.036862850  | 7.783529758  | 10.123541832 |
| 4.894031525  | 6.700044155  | 9.218376160  |
| 4.502636909  | 6.923536777  | 12.452453613 |

C<sub>2</sub>N- NiMn \*CHO

| C  | N  | Ni | Mn | O | H |
|----|----|----|----|---|---|
| 49 | 24 | 1  | 1  | 1 | 1 |

Cartesian

|              |             |             |
|--------------|-------------|-------------|
| -1.405044675 | 4.690650463 | 9.101375580 |
| -0.685574055 | 3.461213827 | 9.132678032 |
| 1.487414360  | 4.738075733 | 9.211571693 |
| 0.776617289  | 3.490813017 | 9.154836655 |
| -0.690537453 | 5.971518040 | 9.154961586 |
| 5.631644249  | 2.325604439 | 8.908668518 |
| 2.751754999  | 2.343819141 | 9.050202370 |
| 3.477902651  | 3.578558922 | 9.071585655 |
| 4.928230762  | 3.559623480 | 9.005435944 |
| 3.458930016  | 1.069969296 | 8.970930099 |
| 0.735986710  | 5.985309124 | 9.278891563 |
| 4.883358479  | 1.064882398 | 8.905697823 |
| 6.986692905  | 4.659984589 | 8.946144104 |
| 7.649772167  | 3.411554813 | 8.866871834 |
| 9.833810806  | 4.658730984 | 8.837964058 |
| 9.116631508  | 3.418371201 | 8.846730232 |
| 7.700826645  | 5.888239384 | 8.943174362 |
| 13.990244865 | 2.279677868 | 9.057293892 |
| 11.093250275 | 2.274662971 | 8.919936180 |
| 11.807800293 | 3.511189461 | 8.919881821 |
| 13.271398544 | 3.517227650 | 8.999657631 |

|              |              |              |
|--------------|--------------|--------------|
| 11.820525169 | 1.002801776  | 8.991432190  |
| 9.111001968  | 5.936745167  | 8.847035408  |
| 13.252932549 | 1.002167702  | 9.049841881  |
| -5.628650665 | 11.916679382 | 8.899740219  |
| -4.909179688 | 10.680469513 | 8.867033958  |
| -2.732263565 | 11.918683052 | 8.900460243  |
| -3.447819471 | 10.684533119 | 8.896626472  |
| -4.892561913 | 13.192445755 | 8.910180092  |
| 1.354633808  | 9.546978951  | 9.275256157  |
| -1.480128765 | 9.537006378  | 9.019224167  |
| -0.759521484 | 10.776300430 | 9.017640114  |
| 0.702012539  | 10.785450935 | 9.114749908  |
| -0.764208794 | 8.263574600  | 9.118116379  |
| -3.460795403 | 13.188570023 | 8.882351875  |
| 0.636739254  | 8.312499046  | 9.272213936  |
| 2.724733353  | 11.861833572 | 9.137573242  |
| 3.431176186  | 10.620551109 | 9.262025833  |
| 5.605712891  | 11.843517303 | 9.113651276  |
| 4.883459568  | 10.601110458 | 9.168822289  |
| 3.473203182  | 13.124399185 | 9.079704285  |
| 9.766297340  | 9.509958267  | 8.865989685  |
| 6.892391682  | 9.469766617  | 9.021167755  |
| 7.592722893  | 10.717144966 | 9.003041267  |
| 9.047683716  | 10.741541862 | 8.932643890  |
| 7.633144855  | 8.227908134  | 8.973648071  |
| 4.896882534  | 13.120840073 | 9.104094505  |
| 9.050617218  | 8.228268623  | 8.867465973  |
| 4.601475239  | 7.635101318  | 11.215151787 |
| 6.978599548  | 2.259387732  | 8.850185394  |
| 5.620793343  | 4.734660149  | 9.046800613  |
| -1.422826767 | 7.100239277  | 9.092304230  |
| 2.835041761  | 4.759748936  | 9.147762299  |
| 1.418861866  | 2.325071096  | 9.083231926  |
| 1.379802704  | 7.176211834  | 9.412829399  |
| -1.311502337 | 2.275239468  | 9.118314743  |
| 13.897576332 | 4.698562145  | 9.028997421  |
| 6.960000992  | 7.040277004  | 9.070343971  |
| 11.168100357 | 4.684944153  | 8.866134644  |
| 9.756654739  | 2.246821880  | 8.874666214  |
| 9.779977798  | 7.092601776  | 8.822861671  |
| 2.713977814  | 9.469796181  | 9.437598228  |
| 1.381870747  | 11.937186241 | 9.090143204  |
| -5.571637630 | 14.343474388 | 8.960579872  |
| -1.395875931 | 11.948266983 | 8.951921463  |

|              |              |              |
|--------------|--------------|--------------|
| -2.811989307 | 9.508920670  | 8.950553894  |
| -2.755477428 | 14.324539185 | 8.866835594  |
| 11.102569580 | 9.498905182  | 8.837045670  |
| 9.674776077  | 11.926737785 | 8.937018394  |
| 2.793959618  | 14.277791977 | 9.013139725  |
| 6.936225891  | 11.877396584 | 9.032094002  |
| 5.547335148  | 9.428740501  | 9.080621719  |
| 5.608038902  | 14.257818222 | 9.097398758  |
| 3.074210644  | 7.765589237  | 10.153062820 |
| 5.120340347  | 6.613335609  | 9.666611671  |
| 3.913372278  | 6.476377487  | 11.280546188 |
| 4.944439411  | 8.156763077  | 12.118860245 |

C<sub>2</sub>N- NiMn \*COOH

| C            | N  | Ni | Mn           | O | H           |
|--------------|----|----|--------------|---|-------------|
| 49           | 24 | 1  | 1            | 2 | 1           |
| Cartesian    |    |    |              |   |             |
| -1.467087030 |    |    | 4.740986347  |   | 8.924814224 |
| -0.748423100 |    |    | 3.511189461  |   | 8.978940010 |
| 1.426063061  |    |    | 4.776782036  |   | 9.065124512 |
| 0.712378740  |    |    | 3.530110598  |   | 9.035586357 |
| -0.744717598 |    |    | 6.019649506  |   | 8.927549362 |
| 5.571174622  |    |    | 2.362697124  |   | 9.001565933 |
| 2.685420036  |    |    | 2.377871513  |   | 9.056916237 |
| 3.413381577  |    |    | 3.609757900  |   | 9.100079536 |
| 4.864283562  |    |    | 3.592537165  |   | 9.095526695 |
| 3.398943424  |    |    | 1.105534554  |   | 9.012437820 |
| 0.680317879  |    |    | 6.024693012  |   | 9.018305779 |
| 4.825534344  |    |    | 1.103531480  |   | 8.965836525 |
| 6.906255245  |    |    | 4.713159561  |   | 9.073548317 |
| 7.577663422  |    |    | 3.469038725  |   | 8.976761818 |
| 9.758148193  |    |    | 4.718563557  |   | 8.930303574 |
| 9.044281006  |    |    | 3.478780270  |   | 8.922690392 |
| 7.616820335  |    |    | 5.949383736  |   | 9.088416100 |
| 13.922436714 |    |    | 2.341873884  |   | 8.923337936 |
| 11.023952484 |    |    | 2.341023684  |   | 8.870940208 |
| 11.736406326 |    |    | 3.577117920  |   | 8.878139496 |
| 13.202232361 |    |    | 3.579092026  |   | 8.887626648 |
| 11.754806519 |    |    | 1.071151018  |   | 8.874234200 |
| 9.029724121  |    |    | 5.991951942  |   | 8.995409966 |
| 13.185457230 |    |    | 1.065141797  |   | 8.920295715 |
| -5.684427738 |    |    | 11.956624985 |   | 8.959518433 |
| -4.970148563 |    |    | 10.717447281 |   | 8.907965660 |
| -2.792550087 |    |    | 11.958859444 |   | 8.827055931 |

|              |              |              |
|--------------|--------------|--------------|
| -3.504770041 | 10.721669197 | 8.842661858  |
| -4.949503899 | 13.229971886 | 8.949078560  |
| 1.323807716  | 9.595557213  | 8.923913956  |
| -1.526987076 | 9.580555916  | 8.804051399  |
| -0.812787056 | 10.822960854 | 8.786844254  |
| 0.652707100  | 10.836205482 | 8.823599815  |
| -0.801632643 | 8.307728767  | 8.848367691  |
| -3.520457745 | 13.229423523 | 8.883719444  |
| 0.609107971  | 8.348164558  | 8.923086166  |
| 2.662714958  | 11.932156563 | 8.902818680  |
| 3.369373798  | 10.697675705 | 9.026046753  |
| 5.546631813  | 11.911636353 | 9.049302101  |
| 4.823188782  | 10.672875404 | 9.089946747  |
| 3.410110950  | 13.195284843 | 8.904833794  |
| 9.701369286  | 9.556532860  | 9.005094528  |
| 6.823750973  | 9.528129578  | 9.143604279  |
| 7.528549671  | 10.774484634 | 9.089838028  |
| 8.988452911  | 10.791417122 | 9.042875290  |
| 7.562116146  | 8.278964996  | 9.139175415  |
| 4.834390163  | 13.186393738 | 8.976455688  |
| 8.981403351  | 8.281976700  | 9.041813850  |
| 3.473840714  | 7.285602093  | 11.637539864 |
| 6.919536591  | 2.309031963  | 8.950248718  |
| 5.541720390  | 4.770484924  | 9.156455994  |
| -1.469002724 | 7.148543358  | 8.852058411  |
| 2.772825480  | 4.795458317  | 9.112877846  |
| 1.352776408  | 2.360074282  | 9.036503792  |
| 1.351289749  | 7.206027031  | 9.049446106  |
| 15.257775307 | 2.328803539  | 8.970443726  |
| 13.836223602 | 4.756492138  | 8.881992340  |
| 6.880603313  | 7.100527763  | 9.197351456  |
| 11.093053818 | 4.750684738  | 8.900910378  |
| 9.685976028  | 2.308599710  | 8.886384010  |
| 9.704399109  | 7.143269062  | 8.984268188  |
| 2.677700996  | 9.533347130  | 9.094697952  |
| 1.322440147  | 11.992998123 | 8.820323944  |
| -5.629436493 | 14.380178452 | 9.007397652  |
| -1.457011223 | 11.991873741 | 8.789004326  |
| -2.862300873 | 9.550091743  | 8.821709633  |
| -2.814199924 | 14.363073349 | 8.895095825  |
| 11.039087296 | 9.540291786  | 8.933994293  |
| 9.619132996  | 11.971814156 | 9.023526192  |
| 2.730278015  | 14.345002174 | 8.856683731  |
| 6.881247044  | 11.938121796 | 9.054756165  |

|             |              |              |
|-------------|--------------|--------------|
| 5.475167274 | 9.495201111  | 9.151128769  |
| 5.542977333 | 14.325143814 | 8.972694397  |
| 2.907562256 | 7.849660397  | 10.004508018 |
| 4.929900646 | 6.658814907  | 9.799361229  |
| 4.582822800 | 6.638193607  | 11.784059525 |
| 2.761625767 | 7.500866890  | 12.767688751 |
| 3.262754440 | 7.098466873  | 13.517117500 |

C<sub>2</sub>N-NiCr\*CO

| C  | N  | Ni | Cr | O |
|----|----|----|----|---|
| 49 | 24 | 1  | 1  | 1 |

Cartesian

|              |              |             |
|--------------|--------------|-------------|
| -1.404221654 | 4.715652466  | 8.992835999 |
| -0.679168582 | 3.491331816  | 9.023940086 |
| 1.495184660  | 4.772112846  | 9.079397202 |
| 0.783995867  | 3.524605989  | 9.050831795 |
| -0.690172195 | 5.996333122  | 9.015786171 |
| 5.634630680  | 2.348358631  | 8.996166229 |
| 2.753651142  | 2.370911121  | 9.031661987 |
| 3.486496449  | 3.602523565  | 9.027954102 |
| 4.924744129  | 3.581743717  | 9.013787270 |
| 3.458205700  | 1.093818784  | 9.012023926 |
| 0.738016367  | 6.009317398  | 9.116729736 |
| 4.882750511  | 1.086858511  | 8.986302376 |
| 6.988689423  | 4.681917667  | 9.024911880 |
| 7.648191452  | 3.432075500  | 9.004770279 |
| 9.830715179  | 4.682104588  | 8.995679855 |
| 9.114044189  | 3.441010237  | 8.994294167 |
| 7.694469929  | 5.903255463  | 9.026136398 |
| 13.997365952 | 2.302763462  | 8.993807793 |
| 11.093624115 | 2.301509857  | 8.973072052 |
| 11.807083130 | 3.537359238  | 8.973828316 |
| 13.272619247 | 3.540097237  | 8.973449707 |
| 11.824561119 | 1.031320214  | 8.973683357 |
| 9.106492043  | 5.956545353  | 9.007667542 |
| 13.258665085 | 1.022731543  | 8.993268013 |
| -5.641480446 | 11.936422348 | 8.976852417 |
| -4.921376705 | 10.698742867 | 8.947026253 |
| -2.744901657 | 11.940370560 | 8.924310684 |
| -3.458536386 | 10.704449654 | 8.923625946 |
| -4.904009819 | 13.214667320 | 8.978471756 |
| 1.359567165  | 9.572788239  | 9.117072105 |
| -1.484214306 | 9.560279846  | 8.941752434 |
| -0.767160416 | 10.802095413 | 8.942525864 |

|              |              |              |
|--------------|--------------|--------------|
| 0.695755005  | 10.812082291 | 8.996490479  |
| -0.761905670 | 8.287914276  | 8.994870186  |
| -3.471911430 | 13.210099220 | 8.948574066  |
| 0.643170357  | 8.332571983  | 9.116567612  |
| 2.716670036  | 11.894963264 | 9.017495155  |
| 3.419577122  | 10.651360512 | 9.116963387  |
| 5.594064236  | 11.854901314 | 9.047142029  |
| 4.869656086  | 10.614988327 | 9.078065872  |
| 3.468434334  | 13.154070854 | 8.993160248  |
| 9.755098343  | 9.524512291  | 8.985870361  |
| 6.878647327  | 9.475530624  | 9.026782990  |
| 7.578303814  | 10.726208687 | 9.028241158  |
| 9.036602020  | 10.754828453 | 9.008693695  |
| 7.616247177  | 8.240661621  | 9.014562607  |
| 4.891282082  | 13.138751984 | 9.021348000  |
| 9.039310455  | 8.242175102  | 8.998002052  |
| 4.061247349  | 7.190910339  | 11.324951172 |
| 6.980347157  | 2.275671721  | 8.993466377  |
| 5.613487244  | 4.772732735  | 9.036197662  |
| -1.421587706 | 7.123281956  | 8.969958305  |
| 2.850590706  | 4.797173500  | 9.041579247  |
| 1.422097445  | 2.353013277  | 9.030708313  |
| 1.385301113  | 7.196919441  | 9.235440254  |
| -1.303565860 | 2.302763462  | 9.018557549  |
| 13.898189545 | 4.721503258  | 8.966429710  |
| 6.928826809  | 7.049168587  | 9.037260056  |
| 11.165470123 | 4.711112976  | 8.983763695  |
| 9.756288528  | 2.270339727  | 8.981567383  |
| 9.774643898  | 7.112935066  | 8.997012138  |
| 2.714201450  | 9.497075081  | 9.234720230  |
| 1.374973297  | 11.965415955 | 8.972208023  |
| -5.577486992 | 14.369196892 | 9.008910179  |
| -1.407857895 | 11.972448349 | 8.924165726  |
| -2.818055868 | 9.530234337  | 8.922725677  |
| -2.761168957 | 14.344051361 | 8.953289986  |
| 11.092134476 | 9.516255379  | 8.953020096  |
| 9.661390305  | 11.942055702 | 9.005508423  |
| 2.794359207  | 14.309091568 | 8.967240334  |
| 6.927589417  | 11.888117790 | 9.025650024  |
| 5.526136398  | 9.428710938  | 9.041130066  |
| 5.608097076  | 14.274087906 | 9.016056061  |
| 3.108148098  | 7.734562874  | 9.988451958  |
| 4.983837605  | 6.655688286  | 9.226386070  |
| 4.521081924  | 6.931275368  | 12.376314163 |

C<sub>2</sub>N- NiCr \*CHO

| C  | N  | Ni | Cr | O | H |
|----|----|----|----|---|---|
| 49 | 24 | 1  | 1  | 1 | 1 |

## Cartesian

|              |              |             |
|--------------|--------------|-------------|
| -1.455387115 | 4.659307480  | 9.074592590 |
| -0.721623063 | 3.433732748  | 9.108269691 |
| 1.426621675  | 4.731461048  | 9.183131218 |
| 0.739402771  | 3.479270220  | 9.131741524 |
| -0.760897875 | 5.954700947  | 9.120402336 |
| 5.607240200  | 2.414013147  | 9.007956505 |
| 2.746587276  | 2.389342070  | 9.069479942 |
| 3.451094151  | 3.645395041  | 9.077291489 |
| 4.908692837  | 3.671967983  | 9.031266212 |
| 3.464012623  | 1.118864417  | 9.029250145 |
| 0.660518169  | 5.962813854  | 9.253386497 |
| 4.881967545  | 1.132712960  | 9.010134697 |
| 6.968878269  | 4.731763840  | 8.958563805 |
| 7.628622055  | 3.469254732  | 8.963064194 |
| 9.837679863  | 4.653442383  | 8.897760391 |
| 9.096323013  | 3.429712296  | 8.948087692 |
| 7.737224579  | 5.924251556  | 8.895996094 |
| 13.966634750 | 2.225061893  | 9.062279701 |
| 11.051710129 | 2.229918242  | 8.999981880 |
| 11.780945778 | 3.457351685  | 8.969364166 |
| 13.240407944 | 3.457092285  | 9.014490128 |
| 11.787539482 | 0.949036002  | 9.047628403 |
| 9.148158073  | 5.946198940  | 8.854902267 |
| 13.228300095 | 0.941974759  | 9.065322876 |
| -5.609216690 | 11.962763786 | 8.931077957 |
| -4.876892090 | 10.740086555 | 8.893278122 |
| -2.696306229 | 11.969580650 | 8.981477737 |
| -3.425657511 | 10.743069649 | 8.938692093 |
| -4.870940208 | 13.239353180 | 8.973323822 |
| 1.352671146  | 9.493169785  | 9.262458801 |
| -1.492008686 | 9.544932365  | 9.034938812 |
| -0.747574329 | 10.771833420 | 9.067356110 |
| 0.707978725  | 10.740677834 | 9.146537781 |
| -0.807122707 | 8.252017975  | 9.109062195 |
| -3.431935310 | 13.246802330 | 8.980398178 |
| 0.595765591  | 8.276947975  | 9.271260262 |
| 2.739227772  | 11.791625023 | 9.157211304 |
| 3.451852322  | 10.531393051 | 9.225629807 |
| 5.599391937  | 11.761866570 | 9.070631981 |

|              |              |              |
|--------------|--------------|--------------|
| 4.889484406  | 10.502081871 | 9.118404388  |
| 3.468528748  | 13.063355446 | 9.109007835  |
| 9.831100464  | 9.536113739  | 8.841653824  |
| 6.973060608  | 9.451666832  | 8.938223839  |
| 7.621267796  | 10.712058067 | 8.942202568  |
| 9.081678391  | 10.757047653 | 8.899488449  |
| 7.742365837  | 8.265635490  | 8.866260529  |
| 4.884012699  | 13.050040245 | 9.092934608  |
| 9.150287628  | 8.241411209  | 8.821782112  |
| 4.661234379  | 7.397615910  | 11.087262154 |
| 6.946617126  | 2.328760386  | 8.989020348  |
| 5.601936340  | 4.857899189  | 9.017135620  |
| -1.479759216 | 7.092500687  | 9.069804192  |
| 2.767076254  | 4.800948620  | 9.116370201  |
| 1.414585233  | 2.331930399  | 9.075275421  |
| 1.306921959  | 7.135746956  | 9.417491913  |
| 15.305377007 | 2.239241838  | 9.103949547  |
| 13.851559639 | 4.646957397  | 9.021473885  |
| 7.035035610  | 7.095973969  | 8.897184372  |
| 11.170740128 | 4.645300388  | 8.909478188  |
| 9.711179733  | 2.238204241  | 8.990099907  |
| 9.854032516  | 7.093394279  | 8.810009956  |
| 2.714570522  | 9.375133514  | 9.357624054  |
| 1.408770084  | 11.882122993 | 9.131850243  |
| -5.556172371 | 14.386519432 | 9.005508423  |
| -1.360558510 | 11.965343475 | 9.036144257  |
| -2.818097591 | 9.551633835  | 8.962433815  |
| -2.742758751 | 14.394502640 | 8.992584229  |
| -5.479150295 | 9.547497749  | 8.838306427  |
| 9.691506386  | 11.952893257 | 8.934840202  |
| 2.776755333  | 14.214269638 | 9.076211929  |
| 6.931350708  | 11.852408409 | 8.997083664  |
| 5.602390289  | 9.309319496  | 9.032976151  |
| 5.587183952  | 14.197077751 | 9.079416275  |
| 3.042556763  | 7.664383411  | 10.124855995 |
| 5.152599812  | 7.188964844  | 9.179316521  |
| 3.783765793  | 6.480009079  | 11.399399757 |
| 5.107676506  | 8.031190872  | 11.879028320 |

C<sub>2</sub>N- NiCr \*COOH

| C  | N  | Ni | Cr | O | H |
|----|----|----|----|---|---|
| 49 | 24 | 1  | 1  | 2 | 1 |

Cartesian

|              |             |             |
|--------------|-------------|-------------|
| -1.477503538 | 4.742571831 | 8.913257599 |
|--------------|-------------|-------------|



|              |              |             |
|--------------|--------------|-------------|
| -0.755087256 | 3.514835596  | 8.971380234 |
| 1.416054010  | 4.786941528  | 9.045522690 |
| 0.703310013  | 3.540716648  | 9.028043747 |
| -0.761565208 | 6.021652222  | 8.913023949 |
| 5.559576988  | 2.381257772  | 9.029088020 |
| 2.676492214  | 2.390913010  | 9.065897942 |
| 3.408855438  | 3.625753403  | 9.087768555 |
| 4.851670742  | 3.613922358  | 9.087947845 |
| 3.386596203  | 1.117927670  | 9.040356636 |
| 0.663635969  | 6.032114506  | 8.999928474 |
| 4.812072754  | 1.119469643  | 9.003834724 |
| 6.916164398  | 4.716315746  | 9.063179970 |
| 7.573087692  | 3.465724230  | 9.005255699 |
| 9.756450653  | 4.715018749  | 8.966177940 |
| 9.040370941  | 3.474860668  | 8.963675499 |
| 7.620830536  | 5.934972763  | 9.067644119 |
| 13.919775009 | 2.335072041  | 8.933777809 |
| 11.018379211 | 2.334740639  | 8.908614159 |
| 11.731288910 | 3.569552422  | 8.909873962 |
| 13.196492195 | 3.572347879  | 8.902080536 |
| 11.748716354 | 1.064233899  | 8.902691841 |
| 9.031562805  | 5.990929127  | 9.010835648 |
| 13.182004929 | 1.056481004  | 8.937521935 |
| -5.703804970 | 11.964941025 | 8.991647720 |
| -4.988826275 | 10.725330353 | 8.940150261 |
| -2.809721947 | 11.969061852 | 8.878662109 |
| -3.523697853 | 10.732578278 | 8.881956100 |
| -4.967300415 | 13.240707397 | 8.987345695 |
| 1.302068233  | 9.595714569  | 8.946539879 |
| -1.548418999 | 9.588251114  | 8.839907646 |
| -0.831706047 | 10.828841209 | 8.838018417 |
| 0.635186195  | 10.839173317 | 8.866476059 |
| -0.825144768 | 8.311993599  | 8.866007805 |
| -3.536191463 | 13.241802216 | 8.933994293 |
| 0.585837364  | 8.355182648  | 8.938278198 |
| 2.651043415  | 11.927357674 | 8.923193932 |
| 3.353874207  | 10.688208580 | 9.025667191 |
| 5.530542374  | 11.900077820 | 9.055655479 |
| 4.808038712  | 10.658853531 | 9.078263283 |
| 3.399678230  | 13.187214851 | 8.923500061 |
| 9.684146881  | 9.556360245  | 9.016992569 |
| 6.812843800  | 9.516068459  | 9.114030838 |
| 7.514389038  | 10.769181252 | 9.089208603 |
| 8.971879959  | 10.791244507 | 9.055350304 |

|              |              |              |
|--------------|--------------|--------------|
| 7.545361042  | 8.275448799  | 9.105155945  |
| 4.823749065  | 13.175484657 | 8.989235878  |
| 8.966237068  | 8.277207375  | 9.042407990  |
| 3.637542248  | 7.254878998  | 11.483136177 |
| 6.909053326  | 2.310646296  | 8.995878220  |
| 5.539232731  | 4.803066730  | 9.127854347  |
| -1.488712788 | 7.153630733  | 8.855172157  |
| 2.763972282  | 4.811598301  | 9.077903748  |
| 1.347069144  | 2.371112823  | 9.042407990  |
| 1.326072693  | 7.213534832  | 9.043523788  |
| 15.255395889 | 2.328630686  | 8.970678329  |
| 13.825092316 | 4.751390934  | 8.881757736  |
| 6.857059002  | 7.085079193  | 9.139554024  |
| 11.090566635 | 4.744358540  | 8.935542107  |
| 9.680353165  | 2.304017305  | 8.931528091  |
| 9.701720238  | 7.143672943  | 9.004985809  |
| 2.659232140  | 9.525276184  | 9.078497887  |
| 1.307424068  | 11.992320061 | 8.859653473  |
| -5.644095898 | 14.392541885 | 9.035820007  |
| -1.473310471 | 11.999007225 | 8.847053528  |
| -2.882418156 | 9.559745789  | 8.852219582  |
| -2.829243183 | 14.375697136 | 8.946450233  |
| 11.023037910 | 9.545927048  | 8.956511497  |
| 9.600120544  | 11.974825859 | 9.045053482  |
| 2.722706795  | 14.340188980 | 8.883972168  |
| 6.865864754  | 11.929144859 | 9.066887856  |
| 5.461706638  | 9.478456497  | 9.112554550  |
| 5.535664558  | 14.314235687 | 8.983530045  |
| 2.998300076  | 7.782853127  | 9.859824181  |
| 4.970467567  | 6.659161091  | 9.623268127  |
| 4.751582146  | 6.615453720  | 11.604689598 |
| 2.954162598  | 7.494930267  | 12.622104645 |
| 3.465666771  | 7.111018181  | 13.373226166 |

C<sub>2</sub>N-CoFe\*CO

| C  | N  | Fe | Co | O |
|----|----|----|----|---|
| 49 | 24 | 1  | 1  | 1 |

Cartesian

|              |             |             |
|--------------|-------------|-------------|
| -1.411859274 | 4.714643955 | 8.998434067 |
| -0.696906090 | 3.481647968 | 9.002555847 |
| 1.467196703  | 4.751650333 | 8.999261856 |
| 0.764178514  | 3.501750708 | 9.006066322 |
| -0.692559958 | 5.996030331 | 9.004121780 |
| 5.628015995  | 2.351658821 | 9.034002304 |

|              |              |              |
|--------------|--------------|--------------|
| 2.745839119  | 2.366285324  | 9.011394501  |
| 3.466145992  | 3.605002403  | 8.999279976  |
| 4.916132927  | 3.592104673  | 9.029357910  |
| 3.456566572  | 1.091066480  | 9.016937256  |
| 0.734089851  | 5.993638039  | 9.017999649  |
| 4.881053448  | 1.085071564  | 9.017189980  |
| 6.970376968  | 4.684843063  | 9.116225243  |
| 7.636950970  | 3.440765142  | 9.093689919  |
| 9.820207596  | 4.688229561  | 9.079073906  |
| 9.103519440  | 3.449007988  | 9.079974174  |
| 7.686400414  | 5.920000553  | 9.116441727  |
| 13.976931572 | 2.310055256  | 9.006695747  |
| 11.079995155 | 2.307216406  | 9.029934883  |
| 11.794445038 | 3.543742895  | 9.029844284  |
| 13.260314941 | 3.547950983  | 9.010601997  |
| 11.809610367 | 1.034966111  | 9.009324074  |
| 9.096866608  | 5.963563442  | 9.092105865  |
| 13.240327835 | 1.033827662  | 9.005598068  |
| -5.631346703 | 11.932387352 | 9.016325951  |
| -4.911060333 | 10.694649696 | 9.014220238  |
| -2.730682850 | 11.934908867 | 9.008711815  |
| -3.445041656 | 10.698338509 | 9.011232376  |
| -4.893277168 | 13.210977554 | 9.015552521  |
| 1.375258446  | 9.556388855  | 9.049571991  |
| -1.468963623 | 9.552396774  | 9.015498161  |
| -0.751875877 | 10.792684555 | 9.013409615  |
| 0.711413383  | 10.800149918 | 9.020177841  |
| -0.746530056 | 8.279815674  | 9.023003578  |
| -3.461012363 | 13.206784248 | 9.011322021  |
| 0.662289143  | 8.325367928  | 9.050778389  |
| 2.717435837  | 11.892599106 | 9.001565933  |
| 3.432115078  | 10.656678200 | 9.016236305  |
| 5.604014874  | 11.880811691 | 9.003816605  |
| 4.875005245  | 10.644976616 | 8.997245789  |
| 3.465779781  | 13.157659531 | 8.995896339  |
| 9.759034157  | 9.529541969  | 9.017585754  |
| 6.870685101  | 9.492924690  | 8.997336388  |
| 7.580898762  | 10.737046242 | 9.009863853  |
| 9.040393829  | 10.760016441 | 9.016254425  |
| 7.608491898  | 8.245273590  | 9.028259277  |
| 4.890441418  | 13.156116486 | 9.000018120  |
| 9.037829399  | 8.248486519  | 9.032489777  |
| 4.195198536  | 7.108309269  | 10.967634201 |
| 6.968748093  | 2.284173965  | 9.058842659  |

|              |              |              |
|--------------|--------------|--------------|
| 5.603237152  | 4.767717838  | 9.093420029  |
| -1.422402859 | 7.122128963  | 9.009359360  |
| 2.815581322  | 4.783828735  | 8.971110344  |
| 1.410225630  | 2.338789940  | 9.003492355  |
| 1.418897152  | 7.177148819  | 9.072197914  |
| -1.325804710 | 2.298599005  | 9.002465248  |
| 13.889929771 | 4.727051735  | 9.001170158  |
| 6.934309006  | 7.063795090  | 9.098352432  |
| 11.154405594 | 4.716848850  | 9.051605225  |
| 9.743692398  | 2.277746916  | 9.052380562  |
| 9.765667915  | 7.120154858  | 9.058553696  |
| 2.748263359  | 9.471798897  | 9.070704460  |
| 1.377709866  | 11.963067055 | 9.005615234  |
| -5.572295189 | 14.362338066 | 9.016703606  |
| -1.394087791 | 11.964277267 | 9.006786346  |
| -2.804444313 | 9.525190353  | 9.011412621  |
| -2.757458687 | 14.344858170 | 9.011861801  |
| 11.096154213 | 9.515692711  | 9.014616013  |
| 9.671764374  | 11.944001198 | 9.015768051  |
| 2.784616470  | 14.309855461 | 8.999279976  |
| 6.934253693  | 11.905741692 | 9.000827789  |
| 5.525029182  | 9.463080406  | 8.967275620  |
| 5.599553108  | 14.292864799 | 9.000504494  |
| 3.294340611  | 7.617823124  | 9.346985817  |
| 5.109459877  | 6.591114521  | 9.423072815  |
| 4.196496010  | 7.107877254  | 12.154589653 |

C<sub>2</sub>N- CoFe \*CHO

| C  | N  | Fe | Co | O | H |
|----|----|----|----|---|---|
| 49 | 24 | 1  | 1  | 1 | 1 |

Cartesian

|              |             |             |
|--------------|-------------|-------------|
| -1.459155917 | 4.654883385 | 9.057312012 |
| -0.731340408 | 3.425230742 | 9.087641716 |
| 1.414758444  | 4.714024067 | 9.172584534 |
| 0.731998920  | 3.461314678 | 9.117396355 |
| -0.758767605 | 5.946631432 | 9.107046127 |
| 5.608222485  | 2.387670755 | 9.043740273 |
| 2.741961479  | 2.375133514 | 9.080135345 |
| 3.442225933  | 3.630235195 | 9.110322952 |
| 4.909608841  | 3.643896341 | 9.072756767 |
| 3.465543509  | 1.103848577 | 9.038357735 |
| 0.657382250  | 5.945161343 | 9.216917992 |
| 4.885745049  | 1.110895276 | 9.037151337 |
| 6.944252014  | 4.723895550 | 8.987363815 |

|              |              |              |
|--------------|--------------|--------------|
| 7.618963242  | 3.464830875  | 8.983386040  |
| 9.817319870  | 4.653975487  | 8.879418373  |
| 9.085681915  | 3.427363396  | 8.948807716  |
| 7.705634594  | 5.938128948  | 8.926019669  |
| 13.951858521 | 2.230998993  | 9.043235779  |
| 11.042509079 | 2.230984688  | 8.988840103  |
| 11.766685486 | 3.462107182  | 8.945531845  |
| 13.229850769 | 3.463418484  | 8.992584229  |
| 11.777571678 | 0.950304091  | 9.037961960  |
| 9.120044708  | 5.945752144  | 8.843507767  |
| 13.216327667 | 0.949309766  | 9.052740097  |
| -5.596362591 | 11.952201843 | 8.921051979  |
| -4.870310783 | 10.728427887 | 8.885106087  |
| -2.691147804 | 11.953382492 | 9.009431839  |
| -3.417395115 | 10.728788376 | 8.951292038  |
| -4.861529350 | 13.225994110 | 8.973666191  |
| 1.361533165  | 9.478053093  | 9.240390778  |
| -1.484296322 | 9.534023285  | 9.065177917  |
| -0.742765427 | 10.760045052 | 9.104166031  |
| 0.719626904  | 10.730820656 | 9.163475990  |
| -0.797121525 | 8.240546227  | 9.126468658  |
| -3.425262451 | 13.229855537 | 9.002034187  |
| 0.608228207  | 8.270895004  | 9.255258560  |
| 2.745086193  | 11.787070274 | 9.138653755  |
| 3.459406376  | 10.537560463 | 9.177102089  |
| 5.611754417  | 11.785442352 | 9.068526268  |
| 4.899359226  | 10.529937744 | 9.094373703  |
| 3.468986034  | 13.063111305 | 9.095237732  |
| 9.833080292  | 9.533692360  | 8.821331978  |
| 6.985873222  | 9.473628998  | 8.935793877  |
| 7.629503727  | 10.728427887 | 8.942669868  |
| 9.091686249  | 10.759627342 | 8.888363838  |
| 7.740927219  | 8.270635605  | 8.893367767  |
| 4.887365818  | 13.061612129 | 9.084311485  |
| 9.145862579  | 8.239941597  | 8.810550690  |
| 4.606704235  | 7.472982407  | 11.130858421 |
| 6.946018219  | 2.320027590  | 9.008424759  |
| 5.590465069  | 4.813586712  | 9.039905548  |
| -1.477595806 | 7.088696480  | 9.081126213  |
| 2.758474112  | 4.784866333  | 9.151830673  |
| 1.407197714  | 2.315358400  | 9.075096130  |
| 1.323596001  | 7.116782665  | 9.370637894  |
| 15.290467262 | 2.236330986  | 9.081954002  |
| 13.846293449 | 4.649911880  | 9.001224518  |

|              |              |              |
|--------------|--------------|--------------|
| 7.024694920  | 7.112531662  | 9.001115799  |
| 11.152709961 | 4.647188187  | 8.878986359  |
| 9.701761246  | 2.238319635  | 8.991197586  |
| 9.836378098  | 7.087889671  | 8.794458389  |
| 2.737966537  | 9.360031128  | 9.290628433  |
| 1.406890392  | 11.873679161 | 9.138132095  |
| -5.551305294 | 14.371056557 | 9.000486374  |
| -1.354709625 | 11.950947762 | 9.075582504  |
| -2.810143471 | 9.538346291  | 8.979029655  |
| -2.736168861 | 14.375826836 | 9.026622772  |
| -5.476720810 | 9.539571762  | 8.819964409  |
| 9.704271317  | 11.949750900 | 8.922528267  |
| 2.772155762  | 14.211430550 | 9.066078186  |
| 6.945810318  | 11.872698784 | 8.994689941  |
| 5.610384941  | 9.347839355  | 8.987040520  |
| 5.583338737  | 14.212237358 | 9.070667267  |
| 3.142763138  | 7.562443256  | 9.876689911  |
| 5.217146397  | 7.457045078  | 9.342450142  |
| 3.759287119  | 6.541369438  | 11.430881500 |
| 5.095511913  | 8.059492111  | 11.932937622 |

C<sub>2</sub>N- CoFe \*COOH

| C  | N  | Fe | Co | O | H |
|----|----|----|----|---|---|
| 49 | 24 | 1  | 1  | 2 | 1 |

Cartesian

|              |             |             |
|--------------|-------------|-------------|
| -1.360792279 | 4.715249538 | 9.082781792 |
| -0.652985573 | 3.482671261 | 9.101699829 |
| 1.536884546  | 4.735856056 | 9.186300278 |
| 0.806385279  | 3.496462107 | 9.147888184 |
| -0.623438597 | 5.982657433 | 9.092483521 |
| 5.653718472  | 2.266650677 | 8.992763519 |
| 2.757937193  | 2.310862303 | 9.108324051 |
| 3.503112555  | 3.531407595 | 9.127764702 |
| 4.941261292  | 3.489674807 | 9.072954178 |
| 3.461468697  | 1.030153036 | 9.049895287 |
| 0.808751822  | 5.999373913 | 9.160865784 |
| 4.889491558  | 1.014517546 | 8.983008385 |
| 6.979322433  | 4.620297909 | 9.058967590 |
| 7.655737877  | 3.385284662 | 8.987976074 |
| 9.818776131  | 4.673617363 | 9.023741722 |
| 9.120907784  | 3.423876047 | 8.973629951 |
| 7.657114983  | 5.872906685 | 9.093510628 |
| 14.010584831 | 2.324739695 | 9.007704735 |
| 11.118516922 | 2.325863838 | 8.932554245 |

|              |              |              |
|--------------|--------------|--------------|
| 11.821018219 | 3.566021681  | 8.988227844  |
| 13.293251038 | 3.569696426  | 9.011808395  |
| 11.845908165 | 1.059939623  | 8.899218559  |
| 9.067989349  | 5.933229446  | 9.073007584  |
| 13.273281097 | 1.048223853  | 8.952857971  |
| -5.647502899 | 11.875090599 | 9.020195961  |
| -4.931666851 | 10.629556656 | 8.997282028  |
| -2.756764412 | 11.874168396 | 8.896572113  |
| -3.459383249 | 10.631963730 | 8.941356659  |
| -4.909649849 | 13.151577950 | 9.004697800  |
| 1.389601231  | 9.573509216  | 8.936729431  |
| -1.456399918 | 9.523893356  | 8.914752007  |
| -0.760170460 | 10.771947861 | 8.847612381  |
| 0.707536221  | 10.809055328 | 8.836073875  |
| -0.703299522 | 8.264684677  | 8.980649948  |
| -3.483224392 | 13.141879082 | 8.937899590  |
| 0.714038849  | 8.320466995  | 9.022697449  |
| 2.709206581  | 11.937834740 | 8.836434364  |
| 3.420622826  | 10.717879295 | 8.931365967  |
| 5.603897572  | 11.891331673 | 8.984429359  |
| 4.860543728  | 10.674719810 | 9.008225441  |
| 3.472959518  | 13.188165665 | 8.853318214  |
| 9.722137451  | 9.484191895  | 9.077256203  |
| 6.822305679  | 9.458728790  | 9.126162529  |
| 7.552605152  | 10.704261780 | 9.085247993  |
| 9.015104294  | 10.716553688 | 9.078102112  |
| 7.552142620  | 8.202834129  | 9.147743225  |
| 4.902013779  | 13.169331551 | 8.926865578  |
| 8.985963821  | 8.214622498  | 9.110952377  |
| 4.690330505  | 6.992736816  | 11.429874420 |
| 7.000989437  | 2.215450048  | 8.955072403  |
| 5.614920616  | 4.667564869  | 9.131472588  |
| -1.358098984 | 7.108396053  | 9.026639938  |
| 2.887548923  | 4.733651638  | 9.185562134  |
| 1.428546309  | 2.313312054  | 9.123894691  |
| 1.479831696  | 7.189887524  | 9.161856651  |
| -1.293973207 | 2.304651260  | 9.057042122  |
| -2.701906204 | 4.740769863  | 9.041921616  |
| 6.877269268  | 7.010216713  | 9.159731865  |
| 11.155786514 | 4.727252960  | 9.027287483  |
| 9.783436775  | 2.269460917  | 8.924274445  |
| 9.725133896  | 7.093927383  | 9.086183548  |
| 2.749984741  | 9.540955544  | 8.995535851  |
| 1.358932018  | 11.977318764 | 8.785458565  |

|              |              |              |
|--------------|--------------|--------------|
| -5.577577591 | 14.309667587 | 9.057149887  |
| -1.422540665 | 11.927789688 | 8.837676048  |
| -2.793277025 | 9.470285416  | 8.949240685  |
| -2.765335083 | 14.268611908 | 8.926650047  |
| 11.063209534 | 9.458972931  | 9.030941963  |
| 9.656007767  | 11.894746780 | 9.054000854  |
| 2.807877541  | 14.345160484 | 8.839566231  |
| 6.936283112  | 11.884298325 | 9.029016495  |
| 5.467347622  | 9.470761299  | 9.104022980  |
| 5.620976448  | 14.300372124 | 8.966267586  |
| 3.436303616  | 7.859690189  | 9.728027344  |
| 5.074112892  | 6.396903515  | 9.703727722  |
| 5.501711845  | 6.679609299  | 12.462570190 |
| 3.697023869  | 7.773586750  | 11.696219444 |
| 5.157725334  | 7.137086868  | 13.267782211 |

C<sub>2</sub>N-CoMn\*CO

| C  | N  | Co | Mn | O |
|----|----|----|----|---|
| 49 | 24 | 1  | 1  | 1 |

Cartesian

|              |             |             |
|--------------|-------------|-------------|
| -1.397307634 | 4.711343765 | 8.973594666 |
| -0.676489115 | 3.482944965 | 8.995302200 |
| 1.494161129  | 4.758120537 | 9.035316467 |
| 0.784212589  | 3.510396957 | 9.020538330 |
| -0.681552649 | 5.992413521 | 8.993771553 |
| 5.641469955  | 2.336023092 | 9.019619942 |
| 2.757395029  | 2.360391378 | 9.031193733 |
| 3.487004042  | 3.592104673 | 9.033605576 |
| 4.931666851  | 3.569408178 | 9.042065620 |
| 3.464869976  | 1.084754586 | 9.024641991 |
| 0.747201681  | 5.999661922 | 9.053459167 |
| 4.890529633  | 1.076526165 | 9.011898041 |
| 6.990686417  | 4.675865173 | 9.049175262 |
| 7.655488014  | 3.427939653 | 9.016488075 |
| 9.836414337  | 4.679756165 | 8.997318268 |
| 9.119808197  | 3.438315392 | 8.996471405 |
| 7.699961185  | 5.904667377 | 9.049770355 |
| 13.998813629 | 2.301351309 | 8.975753784 |
| 11.098582268 | 2.299550056 | 8.969597816 |
| 11.812532425 | 3.536134243 | 8.970029831 |
| 13.277179718 | 3.539549351 | 8.964630127 |
| 11.827713966 | 1.029374838 | 8.964845657 |
| 9.113065720  | 5.953086853 | 9.017981529 |
| 13.260810852 | 1.023394346 | 8.975952148 |



|              |              |              |
|--------------|--------------|--------------|
| -5.630756378 | 11.931047440 | 9.010530472  |
| -4.910686016 | 10.693885803 | 8.996093750  |
| -2.735608101 | 11.933784485 | 8.983962059  |
| -3.448594093 | 10.698468208 | 8.984645844  |
| -4.894226074 | 13.207260132 | 9.010512352  |
| 1.366647243  | 9.566173553  | 9.079668045  |
| -1.475345135 | 9.555265427  | 8.991990089  |
| -0.758607388 | 10.797080994 | 8.990298271  |
| 0.704882145  | 10.809213638 | 9.009287834  |
| -0.753934383 | 8.281775475  | 9.013031960  |
| -3.462892056 | 13.202230453 | 8.995553970  |
| 0.653520107  | 8.330382347  | 9.081665993  |
| 2.723767281  | 11.891518593 | 8.989146233  |
| 3.431881905  | 10.650596619 | 9.048527718  |
| 5.605620861  | 11.863101006 | 9.016794205  |
| 4.880263329  | 10.624398232 | 9.030221939  |
| 3.474982262  | 13.152240753 | 8.971343994  |
| 9.766372681  | 9.523143768  | 9.011502266  |
| 6.886359215  | 9.481050491  | 9.030779839  |
| 7.588071346  | 10.728946686 | 9.028638840  |
| 9.046577454  | 10.753746986 | 9.022878647  |
| 7.628344059  | 8.241295815  | 9.041255951  |
| 4.899160385  | 13.142052650 | 8.993124008  |
| 9.051332474  | 8.243140221  | 9.019331932  |
| 3.870105267  | 7.295704365  | 11.249423981 |
| 6.987385750  | 2.270570517  | 9.011322021  |
| 5.620601654  | 4.749286652  | 9.080783844  |
| -1.414998293 | 7.119477272  | 8.984321594  |
| 2.845981598  | 4.780860424  | 9.019313812  |
| 1.424818277  | 2.340605736  | 9.015840530  |
| 1.404146194  | 7.189642429  | 9.148860931  |
| -1.302991748 | 2.296350956  | 8.991179466  |
| 13.904823303 | 4.720163345  | 8.957825661  |
| 6.951256275  | 7.054500103  | 9.080748558  |
| 11.170988083 | 4.709283352  | 8.982162476  |
| 9.761879921  | 2.268091679  | 8.980974197  |
| 9.781175613  | 7.110442162  | 9.012618065  |
| 2.730034828  | 9.486800194  | 9.145458221  |
| 1.380988598  | 11.962779045 | 8.979335785  |
| -5.569749832 | 14.360695839 | 9.023885727  |
| -1.399121284 | 11.967432976 | 8.980613708  |
| -2.809003115 | 9.524325371  | 8.983116150  |
| -2.752124786 | 14.335043907 | 8.996345520  |
| 11.103108406 | 9.512264252  | 8.996940613  |

|             |              |              |
|-------------|--------------|--------------|
| 9.672089577 | 11.939491272 | 9.022806168  |
| 2.798743248 | 14.306194305 | 8.956979752  |
| 6.939004421 | 11.893017769 | 9.012762070  |
| 5.536369324 | 9.442112923  | 9.014831543  |
| 5.613688469 | 14.277805328 | 8.990262032  |
| 3.163709164 | 7.705972195  | 9.708137512  |
| 5.008314133 | 6.640240192  | 9.397134781  |
| 4.093653679 | 7.163429737  | 12.401208878 |

C<sub>2</sub>N- CoMn \*CHO

|    |    |    |    |   |   |
|----|----|----|----|---|---|
| C  | N  | Co | Mn | O | H |
| 49 | 24 | 1  | 1  | 1 | 1 |

Cartesian

|              |              |             |
|--------------|--------------|-------------|
| -1.443173647 | 4.659883499  | 9.069120407 |
| -0.714584470 | 3.432897091  | 9.100872040 |
| 1.438619137  | 4.725235939  | 9.168660164 |
| 0.748404980  | 3.473621130  | 9.122112274 |
| -0.741695881 | 5.955133438  | 9.111348152 |
| 5.618139744  | 2.388160467  | 9.020232201 |
| 2.751861811  | 2.375767469  | 9.064062119 |
| 3.455937386  | 3.627324343  | 9.071262360 |
| 4.921156883  | 3.644213676  | 9.031949997 |
| 3.470651627  | 1.103473902  | 9.028997421 |
| 0.679712057  | 5.962108135  | 9.224100113 |
| 4.891027927  | 1.113186598  | 9.021114349 |
| 6.965335369  | 4.718275547  | 8.965548515 |
| 7.633639336  | 3.457942486  | 8.972406387 |
| 9.834226608  | 4.652101994  | 8.879976273 |
| 9.102064133  | 3.424322844  | 8.947296143 |
| 7.725785732  | 5.925361156  | 8.914841652 |
| 13.970727921 | 2.231460094  | 9.058877945 |
| 11.060445786 | 2.232569695  | 8.998056412 |
| 11.784147263 | 3.463303328  | 8.957196236 |
| 13.247030258 | 3.464210987  | 9.007649422 |
| 11.794069290 | 0.953402400  | 9.047555923 |
| 9.135820389  | 5.941688538  | 8.838990211 |
| 13.232616425 | 0.946773529  | 9.064277649 |
| -5.601154327 | 11.952749252 | 8.925191879 |
| -4.874279022 | 10.729278564 | 8.886707306 |
| -2.694983006 | 11.955846786 | 8.999478340 |
| -3.421388626 | 10.730978966 | 8.948375702 |
| -4.864965916 | 13.226008415 | 8.974386215 |
| 1.358828545  | 9.494235992  | 9.233370781 |
| -1.485877514 | 9.538837433  | 9.052542686 |

|              |              |              |
|--------------|--------------|--------------|
| -0.744055271 | 10.766861916 | 9.087048531  |
| 0.716298580  | 10.742117882 | 9.150192261  |
| -0.796198368 | 8.247247696  | 9.111707687  |
| -3.428466320 | 13.231455803 | 8.994167328  |
| 0.608361244  | 8.279829979  | 9.241793633  |
| 2.741815567  | 11.792849541 | 9.145241737  |
| 3.456170082  | 10.538785934 | 9.188424110  |
| 5.607511044  | 11.775845528 | 9.063161850  |
| 4.895491600  | 10.521996498 | 9.088217735  |
| 3.473761082  | 13.067261696 | 9.101034164  |
| 9.831025124  | 9.531718254  | 8.816058159  |
| 6.977104187  | 9.459708214  | 8.917451859  |
| 7.625618458  | 10.717432976 | 8.932769775  |
| 9.088850021  | 10.755290031 | 8.885087967  |
| 7.737083435  | 8.264496803  | 8.873729706  |
| 4.891550541  | 13.056697845 | 9.087065697  |
| 9.144239426  | 8.237996101  | 8.799444199  |
| 4.541493893  | 7.446121693  | 11.192273140 |
| 6.959163666  | 2.314810753  | 8.995517731  |
| 5.603659630  | 4.818572998  | 8.997174263  |
| -1.466979742 | 7.088955879  | 9.077705383  |
| 2.779290199  | 4.783828735  | 9.116225243  |
| 1.418529034  | 2.324177742  | 9.074772835  |
| 1.333487034  | 7.140689850  | 9.374112129  |
| 15.308578491 | 2.241331339  | 9.098945618  |
| 13.863157272 | 4.651626587  | 9.016325951  |
| 7.033130646  | 7.097342491  | 8.985779762  |
| 11.169490814 | 4.648009777  | 8.885663986  |
| 9.718866348  | 2.236907482  | 8.993448257  |
| 9.844289780  | 7.090468884  | 8.791866302  |
| 2.729181290  | 9.365189552  | 9.318204880  |
| 1.409160614  | 11.886662483 | 9.139122009  |
| -5.550647736 | 14.374155045 | 9.000900269  |
| -1.359078407 | 11.956265450 | 9.059328079  |
| -2.811973572 | 9.541257858  | 8.975700378  |
| -2.735578537 | 14.374918938 | 9.011951447  |
| -5.478484631 | 9.538994789  | 8.817605972  |
| 9.698329926  | 11.947503090 | 8.925444603  |
| 2.783170700  | 14.216935158 | 9.074069977  |
| 6.944313049  | 11.859152794 | 8.985744476  |
| 5.600400925  | 9.336311340  | 8.965116501  |
| 5.593314171  | 14.206228256 | 9.078425407  |
| 3.056932926  | 7.675595284  | 10.031489372 |
| 5.139884949  | 7.298341274  | 9.330642700  |

|             |             |              |
|-------------|-------------|--------------|
| 3.590702057 | 6.586834431 | 11.466593742 |
| 5.020534992 | 8.016721725 | 12.010571480 |

C<sub>2</sub>N- CoMn \*COOH

|    |    |    |    |   |   |
|----|----|----|----|---|---|
| C  | N  | Co | Mn | O | H |
| 49 | 24 | 1  | 1  | 2 | 1 |

Cartesian

|              |              |             |
|--------------|--------------|-------------|
| -1.463467479 | 4.727627754  | 8.886347771 |
| -0.744570851 | 3.497370005  | 8.942111969 |
| 1.422011375  | 4.770484924  | 9.010817528 |
| 0.714375734  | 3.520974398  | 9.001709938 |
| -0.747321367 | 6.007501602  | 8.884727478 |
| 5.574744225  | 2.360232830  | 9.059778214 |
| 2.691493511  | 2.379889011  | 9.072341919 |
| 3.417608023  | 3.614887714  | 9.102240562 |
| 4.868601799  | 3.594021559  | 9.123821259 |
| 3.402237892  | 1.106226325  | 9.059687614 |
| 0.676474333  | 6.011377811  | 8.945856094 |
| 4.828396797  | 1.101225853  | 9.037313461 |
| 6.922787189  | 4.701443672  | 9.105983734 |
| 7.588487625  | 3.454181194  | 9.029394150 |
| 9.772342682  | 4.700492859  | 8.971991539 |
| 9.055455208  | 3.461502075  | 8.974853516 |
| 7.635922909  | 5.931168556  | 9.111797333 |
| 13.930765152 | 2.320358753  | 8.913707733 |
| 11.031507492 | 2.319090605  | 8.910342216 |
| 11.745541573 | 3.554032087  | 8.902673721 |
| 13.210536957 | 3.557505131  | 8.884799957 |
| 11.761354446 | 1.047935605  | 8.903736115 |
| 9.048692703  | 5.976907730  | 9.030546188 |
| 13.193744659 | 1.043900609  | 8.923427582 |
| -5.687988281 | 11.953138351 | 9.026945114 |
| -4.969107628 | 10.715329170 | 8.986878395 |
| -2.791459560 | 11.954435349 | 8.943138123 |
| -3.505369425 | 10.720229149 | 8.940132141 |
| -4.951683044 | 13.228443146 | 9.025110245 |
| 1.311760902  | 9.577802658  | 8.911727905 |
| -1.533318281 | 9.573768616  | 8.884962082 |
| -0.814891338 | 10.813925743 | 8.892395973 |
| 0.651518822  | 10.824028015 | 8.891783714 |
| -0.812439919 | 8.296705246  | 8.873928070 |
| -3.519717693 | 13.225576401 | 8.987093925 |
| 0.597618103  | 8.346190453  | 8.901576042 |
| 2.666959286  | 11.908782959 | 8.922006607 |

|              |              |              |
|--------------|--------------|--------------|
| 3.375764370  | 10.673667908 | 8.980542183  |
| 5.549727440  | 11.890942574 | 9.035783768  |
| 4.822730541  | 10.651216507 | 9.048510551  |
| 3.414854527  | 13.170354843 | 8.923031807  |
| 9.706993103  | 9.545552254  | 9.043830872  |
| 6.826547146  | 9.508156776  | 9.129581451  |
| 7.530372143  | 10.755130768 | 9.095651627  |
| 8.988204956  | 10.777956963 | 9.072125435  |
| 7.572168350  | 8.264064789  | 9.142470360  |
| 4.839365482  | 13.165325165 | 8.973053932  |
| 8.992527962  | 8.268157005  | 9.067841530  |
| 3.458961010  | 7.408207417  | 11.365578651 |
| 6.923480034  | 2.298858404  | 9.020520210  |
| 5.555597782  | 4.768409729  | 9.181457520  |
| -1.478919983 | 7.139493942  | 8.858214378  |
| 2.769663811  | 4.798080921  | 9.070991516  |
| 1.358924866  | 2.355794430  | 9.032760620  |
| 1.347288609  | 7.196646214  | 8.968841553  |
| 15.267219543 | 2.312620401  | 8.945261955  |
| 13.838446617 | 4.737167835  | 8.861021996  |
| 6.897418499  | 7.082730293  | 9.202409744  |
| 11.105883598 | 4.728665352  | 8.931311607  |
| 9.694296837  | 2.289923668  | 8.941428185  |
| 9.719259262  | 7.129867554  | 9.023759842  |
| 2.682944298  | 9.498242378  | 8.989704132  |
| 1.321484566  | 11.979379654 | 8.889408112  |
| -5.628962517 | 14.380510330 | 9.057222366  |
| -1.455039501 | 11.984768867 | 8.914518356  |
| -2.866768360 | 9.546071053  | 8.903790474  |
| -2.812453270 | 14.358634949 | 8.996525764  |
| 11.044553757 | 9.535666466  | 8.997714043  |
| 9.615315437  | 11.962692261 | 9.065573692  |
| 2.735678673  | 14.323199272 | 8.894142151  |
| 6.880873203  | 11.919143677 | 9.060390472  |
| 5.477364063  | 9.471856117  | 9.107675552  |
| 5.550099373  | 14.302404404 | 8.962253571  |
| 3.055117130  | 7.739117146  | 9.589949608  |
| 4.965383530  | 6.658858299  | 9.726515770  |
| 4.531010628  | 6.790700912  | 11.712834358 |
| 2.626927853  | 7.804080009  | 12.351131439 |
| 3.020612240  | 7.529991150  | 13.213296890 |

C<sub>2</sub>N-CoCr\*CO

C N Co Cr O

|              |    |              |   |             |
|--------------|----|--------------|---|-------------|
| 49           | 24 | 1            | 1 | 1           |
| Cartesian    |    |              |   |             |
| -1.401060224 |    | 4.709427357  |   | 8.976222038 |
| -0.677462697 |    | 3.482872725  |   | 8.987633705 |
| 1.497713804  |    | 4.754099846  |   | 9.000180244 |
| 0.784645081  |    | 3.509013653  |   | 8.999675751 |
| -0.682085037 |    | 5.990885735  |   | 8.985834122 |
| 5.638599396  |    | 2.341167688  |   | 9.028403282 |
| 2.755506516  |    | 2.358157873  |   | 9.014867783 |
| 3.488301992  |    | 3.588934422  |   | 9.010296822 |
| 4.928812504  |    | 3.572304726  |   | 9.030203819 |
| 3.464970112  |    | 1.081728458  |   | 9.020483017 |
| 0.746619463  |    | 5.995800018  |   | 9.016812325 |
| 4.890295982  |    | 1.079177737  |   | 9.020843506 |
| 6.985934734  |    | 4.680952072  |   | 9.052271843 |
| 7.648041725  |    | 3.432911396  |   | 9.039113998 |
| 9.830565453  |    | 4.681816578  |   | 9.028818130 |
| 9.115133286  |    | 3.441716194  |   | 9.028710365 |
| 7.691649914  |    | 5.905027866  |   | 9.052380562 |
| 13.996076584 |    | 2.304161549  |   | 8.988714218 |
| 11.094463348 |    | 2.303513050  |   | 9.002862930 |
| 11.807092667 |    | 3.538439989  |   | 9.003474236 |
| 13.272387505 |    | 3.540442944  |   | 8.989361763 |
| 11.825267792 |    | 1.033784389  |   | 8.987759590 |
| 9.103555679  |    | 5.956243038  |   | 9.039258003 |
| 13.257616043 |    | 1.024806738  |   | 8.988300323 |
| -5.627577782 |    | 11.928626060 |   | 9.019656181 |
| -4.911143303 |    | 10.689980507 |   | 9.016865730 |
| -2.732762814 |    | 11.931623459 |   | 9.010601997 |
| -3.446015120 |    | 10.695644379 |   | 9.013013840 |
| -4.891106606 |    | 13.204479218 |   | 9.019313812 |
| 1.378793716  |    | 9.563234329  |   | 9.064529419 |
| -1.470893860 |    | 9.552858353  |   | 9.017388344 |
| -0.754879951 |    | 10.794025421 |   | 9.014165878 |
| 0.710905552  |    | 10.805611610 |   | 9.018522263 |
| -0.746846199 |    | 8.278172493  |   | 9.023813248 |
| -3.460463047 |    | 13.203152657 |   | 9.014616013 |
| 0.662979603  |    | 8.321807861  |   | 9.067212105 |
| 2.724249363  |    | 11.894055367 |   | 8.980092049 |
| 3.434377193  |    | 10.654776573 |   | 9.012078285 |
| 5.607243061  |    | 11.864152908 |   | 8.997570038 |
| 4.885197639  |    | 10.624730110 |   | 8.996598244 |
| 3.474890709  |    | 13.157270432 |   | 8.972873688 |
| 9.762637138  |    | 9.521054268  |   | 9.020915985 |

|              |              |              |
|--------------|--------------|--------------|
| 6.888264179  | 9.480920792  | 9.008262634  |
| 7.588362694  | 10.730719566 | 9.012798309  |
| 9.048323631  | 10.754265785 | 9.018846512  |
| 7.621929169  | 8.240647316  | 9.029196739  |
| 4.899003029  | 13.143651962 | 8.986140251  |
| 9.043304443  | 8.242146492  | 9.027935982  |
| 3.857532978  | 7.310475349  | 11.244546890 |
| 6.986553669  | 2.273106575  | 9.034200668  |
| 5.609193802  | 4.764259338  | 9.060101509  |
| -1.411404133 | 7.117949963  | 8.995446205  |
| 2.847529411  | 4.779649734  | 8.986013412  |
| 1.425467610  | 2.337723494  | 9.001242638  |
| 1.410752296  | 7.177940845  | 9.109709740  |
| -1.306477666 | 2.296884060  | 8.988929749  |
| 13.902658463 | 4.720422745  | 8.978724480  |
| 6.929875374  | 7.055162907  | 9.059705734  |
| 11.164889336 | 4.712957859  | 9.015749931  |
| 9.756454468  | 2.271175861  | 9.014885902  |
| 9.776674271  | 7.109188080  | 9.034416199  |
| 2.743188858  | 9.488832474  | 9.106577873  |
| 1.383350849  | 11.961423874 | 8.988696098  |
| -5.567968845 | 14.358677864 | 9.020735741  |
| -1.396566868 | 11.963729858 | 9.006929398  |
| -2.804718256 | 9.522841454  | 9.012618065  |
| -2.751010418 | 14.335908890 | 9.016163826  |
| 11.101478577 | 9.509583473  | 9.018432617  |
| 9.674226761  | 11.937978745 | 9.019638062  |
| 2.797852516  | 14.308572769 | 8.975250244  |
| 6.941849232  | 11.893565178 | 8.999225616  |
| 5.536909580  | 9.442444801  | 8.982414246  |
| 5.611931801  | 14.281192780 | 8.988317490  |
| 3.143740654  | 7.720556259  | 9.722807884  |
| 4.969743252  | 6.657042503  | 9.265266418  |
| 4.201047421  | 7.113367558  | 12.356856346 |

C<sub>2</sub>N- CoCr\*CHO

| C  | N  | Co | Cr | O | H |
|----|----|----|----|---|---|
| 49 | 24 | 1  | 1  | 1 | 1 |

Cartesian

|              |             |             |
|--------------|-------------|-------------|
| -1.451343894 | 4.656483173 | 9.070181847 |
| -0.720741034 | 3.430418491 | 9.100817680 |
| 1.429558992  | 4.725451946 | 9.160956383 |
| 0.742315054  | 3.473361731 | 9.121985435 |
| -0.751080513 | 5.952971935 | 9.109908104 |

|              |              |              |
|--------------|--------------|--------------|
| 5.608447075  | 2.404314756  | 9.014525414  |
| 2.748126268  | 2.381430626  | 9.068220139  |
| 3.450927973  | 3.635048389  | 9.076626778  |
| 4.911588669  | 3.661419868  | 9.037026405  |
| 3.467107773  | 1.109555125  | 9.029196739  |
| 0.670735121  | 5.959182739  | 9.217692375  |
| 4.885910988  | 1.124037743  | 9.017981529  |
| 6.963112354  | 4.730567455  | 8.971938133  |
| 7.626001835  | 3.466185331  | 8.973972321  |
| 9.831656456  | 4.653269291  | 8.911727905  |
| 9.095224380  | 3.427521944  | 8.960058212  |
| 7.726119041  | 5.926917553  | 8.908632278  |
| 13.965785980 | 2.225897551  | 9.057618141  |
| 11.051860809 | 2.228304386  | 9.008658409  |
| 11.778017044 | 3.457928181  | 8.974871635  |
| 13.240748405 | 3.458230734  | 9.014309883  |
| 11.787247658 | 0.946859956  | 9.055475235  |
| 9.137583733  | 5.945060253  | 8.870346069  |
| 13.227067947 | 0.939870834  | 9.061883926  |
| -5.603043556 | 11.956711769 | 8.928792000  |
| -4.875227928 | 10.732563972 | 8.898623466  |
| -2.693527222 | 11.960588455 | 9.001728058  |
| -3.421962976 | 10.734941483 | 8.951904297  |
| -4.865831375 | 13.231484413 | 8.973378181  |
| 1.356307507  | 9.486785889  | 9.246311188  |
| -1.487708092 | 9.538375854  | 9.053405762  |
| -0.743979931 | 10.765089035 | 9.095724106  |
| 0.714701653  | 10.735864639 | 9.168498993  |
| -0.801023960 | 8.245316505  | 9.112535477  |
| -3.428200245 | 13.239353180 | 8.992746353  |
| 0.604276180  | 8.273734093  | 9.248147964  |
| 2.741915226  | 11.783741951 | 9.170028687  |
| 3.455696583  | 10.527040482 | 9.212021828  |
| 5.602536678  | 11.764431953 | 9.060659409  |
| 4.893644333  | 10.504185677 | 9.104886055  |
| 3.471214771  | 13.059595108 | 9.117792130  |
| 9.830409050  | 9.531920433  | 8.843904495  |
| 6.978285789  | 9.453396797  | 8.929512024  |
| 7.624719620  | 10.715127945 | 8.935919762  |
| 9.086503983  | 10.756470680 | 8.895311356  |
| 7.738430977  | 8.264064789  | 8.859672546  |
| 4.887581825  | 13.047951698 | 9.086977005  |
| 9.146228790  | 8.238097191  | 8.825345993  |
| 4.620989799  | 7.473285675  | 11.092320442 |



|              |              |              |
|--------------|--------------|--------------|
| 6.949587345  | 2.325431347  | 8.998667717  |
| 5.596712589  | 4.845304489  | 9.030528069  |
| -1.473610401 | 7.087356091  | 9.075510025  |
| 2.770046949  | 4.790962219  | 9.108324051  |
| 1.415176153  | 2.325431347  | 9.076571465  |
| 1.328462124  | 7.134003639  | 9.371393204  |
| 15.303704262 | 2.237411737  | 9.095219612  |
| 13.855245590 | 4.646741390  | 9.020358086  |
| 7.019154072  | 7.099245071  | 8.892503738  |
| 11.166371346 | 4.644594193  | 8.918999672  |
| 9.710537910  | 2.237411737  | 9.000467300  |
| 9.848466873  | 7.090036392  | 8.821512222  |
| 2.726602077  | 9.352508545  | 9.317214012  |
| 1.410142422  | 11.879630089 | 9.158508301  |
| -5.552678108 | 14.378939629 | 9.000918388  |
| -1.358179092 | 11.956640244 | 9.065609932  |
| -2.814103365 | 9.544802666  | 8.974979401  |
| -2.737991333 | 14.385611534 | 9.008621216  |
| -5.478800774 | 9.541934967  | 8.845649719  |
| 9.696775436  | 11.949420929 | 8.927171707  |
| 2.779227257  | 14.209154129 | 9.092988014  |
| 6.938006878  | 11.852120399 | 8.995716095  |
| 5.608090401  | 9.316943169  | 9.030528069  |
| 5.588032722  | 14.198893547 | 9.069660187  |
| 3.076992989  | 7.651313305  | 9.995867729  |
| 5.120625019  | 7.240828514  | 9.190925598  |
| 3.715324879  | 6.578289032  | 11.420891762 |
| 5.077756405  | 8.110505104  | 11.873717308 |

C<sub>2</sub>N- CoCr\*COOH

| C  | N  | Co | Cr | O | H |
|----|----|----|----|---|---|
| 49 | 24 | 1  | 1  | 2 | 1 |

Cartesian

|              |             |             |
|--------------|-------------|-------------|
| -1.447909594 | 4.737570763 | 8.921195984 |
| -0.724204063 | 3.512010813 | 8.986517906 |
| 1.442219973  | 4.794795513 | 9.046080589 |
| 0.733286142  | 3.544362783 | 9.045215607 |
| -0.737096310 | 6.018871307 | 8.917218208 |
| 5.586974144  | 2.363489628 | 9.053892136 |
| 2.706335306  | 2.398190260 | 9.105821609 |
| 3.442283869  | 3.633563995 | 9.142938614 |
| 4.885007858  | 3.597191811 | 9.160938263 |
| 3.406297684  | 1.118273497 | 9.074610710 |
| 0.688570976  | 6.029563904 | 8.964431763 |

|              |              |              |
|--------------|--------------|--------------|
| 4.830759048  | 1.108085275  | 9.033209801  |
| 6.968738079  | 4.682782173  | 9.111834526  |
| 7.612890244  | 3.433444738  | 8.999442101  |
| 9.791620255  | 4.696270466  | 8.927136421  |
| 9.077768326  | 3.451875687  | 8.929853439  |
| 7.663645267  | 5.904249668  | 9.092231750  |
| 13.956098557 | 2.322592497  | 8.945910454  |
| 11.057682037 | 2.320531845  | 8.890307426  |
| 11.767671585 | 3.554954529  | 8.883431435  |
| 13.231893539 | 3.559018135  | 8.894969940  |
| 11.785664558 | 1.051768780  | 8.910665512  |
| 9.068504333  | 5.972080231  | 8.991000175  |
| 13.217772484 | 1.042373180  | 8.953056335  |
| -5.704919815 | 11.957937241 | 9.028458595  |
| -4.983717442 | 10.718960762 | 8.987957954  |
| -2.804987907 | 11.959391594 | 8.960525513  |
| -3.517798662 | 10.724724770 | 8.956439972  |
| -4.965477467 | 13.237435341 | 9.030726433  |
| 1.302317142  | 9.593957901  | 8.915669441  |
| -1.540964127 | 9.583149910  | 8.914752007  |
| -0.824101448 | 10.825469017 | 8.920853615  |
| 0.643905640  | 10.840642929 | 8.914391518  |
| -0.816009521 | 8.307238579  | 8.901756287  |
| -3.532513142 | 13.231166840 | 8.992008209  |
| 0.593891144  | 8.363741875  | 8.910918236  |
| 2.662025452  | 11.921997070 | 8.942130089  |
| 3.367393970  | 10.683957100 | 8.980757713  |
| 5.542838573  | 11.882699013 | 9.059958458  |
| 4.810043812  | 10.646014214 | 9.057905197  |
| 3.419763565  | 13.177213669 | 8.947259903  |
| 9.692874908  | 9.541185379  | 9.026226044  |
| 6.811289310  | 9.485013962  | 9.128502846  |
| 7.516753197  | 10.738832474 | 9.100889206  |
| 8.973743439  | 10.770234108 | 9.067824364  |
| 7.558930874  | 8.250533104  | 9.130716324  |
| 4.844108105  | 13.161982536 | 9.005832672  |
| 8.980355263  | 8.260159492  | 9.042156219  |
| 3.386613369  | 7.373219013  | 11.221055984 |
| 6.937383175  | 2.284606218  | 8.993519783  |
| 5.600083351  | 4.765887737  | 9.268847466  |
| -1.475275993 | 7.147102833  | 8.894592285  |
| 2.794664145  | 4.825850010  | 9.106451035  |
| 1.376970172  | 2.378202915  | 9.070847511  |
| 1.351838589  | 7.219659805  | 8.957736015  |

|              |              |              |
|--------------|--------------|--------------|
| 15.291804314 | 2.322635651  | 8.992782593  |
| 13.854661942 | 4.740842342  | 8.877869606  |
| 6.889299393  | 7.048317909  | 9.193895340  |
| 11.124844551 | 4.728305340  | 8.892756462  |
| 9.720687866  | 2.284419060  | 8.901989937  |
| 9.725198746  | 7.131654263  | 8.976564407  |
| 2.673634052  | 9.510332108  | 8.959626198  |
| 1.315926552  | 11.995606422 | 8.915652275  |
| -5.633039474 | 14.395669937 | 9.069766998  |
| -1.468509197 | 11.993487358 | 8.940761566  |
| -2.874830008 | 9.552396774  | 8.930448532  |
| -2.819026470 | 14.360134125 | 8.988767624  |
| 11.032007217 | 9.538059235  | 8.984951973  |
| 9.598467827  | 11.958872795 | 9.066690445  |
| 2.750494957  | 14.333790779 | 8.904726028  |
| 6.873368263  | 11.903753281 | 9.082151413  |
| 5.454194069  | 9.455327988  | 9.111383438  |
| 5.564558983  | 14.295746803 | 9.002862930  |
| 3.127175808  | 7.728409290  | 9.420623779  |
| 5.112431049  | 6.557927132  | 9.864792824  |
| 4.280706406  | 6.551744938  | 11.664522171 |
| 2.571290016  | 7.929120541  | 12.137616158 |
| 2.820785522  | 7.578352451  | 13.025447845 |

C<sub>2</sub>N-FeMn\*CO

| C  | N  | Fe | Mn | O |
|----|----|----|----|---|
| 49 | 24 | 1  | 1  | 1 |

Cartesian

|              |             |             |
|--------------|-------------|-------------|
| -1.398913383 | 4.708014965 | 8.982234001 |
| -0.677296162 | 3.479385614 | 9.003258705 |
| 1.490849972  | 4.751376629 | 9.005832672 |
| 0.783114672  | 3.503508806 | 9.017873764 |
| -0.681827068 | 5.988882542 | 8.989470482 |
| 5.641237259  | 2.334870338 | 9.025019646 |
| 2.759134054  | 2.359743118 | 9.037619591 |
| 3.487519979  | 3.592594862 | 9.035424232 |
| 4.933921337  | 3.567750931 | 9.047052383 |
| 3.467865229  | 1.082996488 | 9.029465675 |
| 0.743541241  | 5.989228725 | 9.005130768 |
| 4.893424988  | 1.076065063 | 9.016794205 |
| 6.991518021  | 4.675749779 | 9.042156219 |
| 7.655678272  | 3.428444147 | 9.014273643 |
| 9.837862015  | 4.678142071 | 8.999513626 |
| 9.121856689  | 3.437738895 | 8.999099731 |

|              |              |              |
|--------------|--------------|--------------|
| 7.700693130  | 5.904379368  | 9.042119980  |
| 13.997498512 | 2.301380157  | 8.999640465  |
| 11.099988937 | 2.299420357  | 8.988444328  |
| 11.812832832 | 3.534376144  | 8.989055634  |
| 13.276098251 | 3.537676096  | 8.987471581  |
| 11.828645706 | 1.030556560  | 8.986463547  |
| 9.112915993  | 5.952827454  | 9.014760017  |
| 13.260104179 | 1.024042845  | 8.998559952  |
| -5.625489712 | 11.928899765 | 9.011843681  |
| -4.906476021 | 10.691234589 | 9.002483368  |
| -2.729026794 | 11.930282593 | 9.001943588  |
| -3.442054272 | 10.694952011 | 9.003456116  |
| -4.889300823 | 13.204262733 | 9.012204170  |
| 1.376139641  | 9.559934616  | 9.063233376  |
| -1.468322754 | 9.550883293  | 9.030851364  |
| -0.751435280 | 10.792613029 | 9.028458595  |
| 0.713992596  | 10.804732323 | 9.035136223  |
| -0.745988846 | 8.275679588  | 9.038808823  |
| -3.458017349 | 13.200444221 | 9.001476288  |
| 0.663088322  | 8.324762344  | 9.065015793  |
| 2.726603985  | 11.892801285 | 8.984645844  |
| 3.438879490  | 10.658306122 | 9.000882149  |
| 5.611228466  | 11.867194176 | 9.012528419  |
| 4.884597778  | 10.630263329 | 9.001133919  |
| 3.477103710  | 13.154474258 | 8.978633881  |
| 9.768726349  | 9.521226883  | 9.015534401  |
| 6.886575222  | 9.480503082  | 9.032004356  |
| 7.589902401  | 10.727880478 | 9.033246994  |
| 9.049962997  | 10.752378464 | 9.026333809  |
| 7.631256104  | 8.240286827  | 9.045180321  |
| 4.901822567  | 13.144069672 | 8.999028206  |
| 9.052721977  | 8.244106293  | 9.023435593  |
| 3.756454945  | 7.362626553  | 11.209230423 |
| 6.990313530  | 2.271262169  | 9.015011787  |
| 5.621375084  | 4.746188641  | 9.079901695  |
| -1.413791895 | 7.116984367  | 9.010044098  |
| 2.841223240  | 4.780427933  | 9.002754211  |
| 1.426507592  | 2.335922241  | 9.027324677  |
| 1.416501522  | 7.173315048  | 9.084941864  |
| -1.304980040 | 2.293857813  | 9.008243561  |
| 13.904479980 | 4.718678951  | 8.976041794  |
| 6.954475880  | 7.055667400  | 9.079200745  |
| 11.171586037 | 4.709052563  | 8.992584229  |
| 9.762037277  | 2.267270327  | 8.991594315  |

|              |              |              |
|--------------|--------------|--------------|
| 9.782406807  | 7.107646465  | 9.015048027  |
| 2.750069141  | 9.483428001  | 9.082368851  |
| 1.383592606  | 11.962389946 | 9.004859924  |
| -5.565090179 | 14.358937263 | 9.025848389  |
| -1.392714977 | 11.962736130 | 9.009863853  |
| -2.802247524 | 9.521327972  | 9.013715744  |
| -2.748822689 | 14.332781792 | 9.001115799  |
| 11.107061386 | 9.511096954  | 9.001728058  |
| 9.676207542  | 11.936824799 | 9.023237228  |
| 2.799807549  | 14.306425095 | 8.973810196  |
| 6.944029808  | 11.893766403 | 9.021617889  |
| 5.534772396  | 9.446263313  | 8.998991966  |
| 5.614886284  | 14.280371666 | 9.005255699  |
| 3.177943707  | 7.696879864  | 9.584154129  |
| 4.990867615  | 6.649852276  | 9.361889839  |
| 4.012392521  | 7.214227200  | 12.354426384 |

C<sub>2</sub>N- FeMn\*CHO

| C  | N  | Fe | Mn | O | H |
|----|----|----|----|---|---|
| 49 | 24 | 1  | 1  | 1 | 1 |

Cartesian

|              |             |             |
|--------------|-------------|-------------|
| -1.465154290 | 4.648499489 | 9.048995972 |
| -0.732837796 | 3.419985056 | 9.070991516 |
| 1.407436609  | 4.716157436 | 9.163062096 |
| 0.728679180  | 3.460521936 | 9.103949547 |
| -0.770224333 | 5.943043232 | 9.087803841 |
| 5.602830887  | 2.404963255 | 9.050742149 |
| 2.744149208  | 2.384975672 | 9.080316544 |
| 3.441742897  | 3.644155741 | 9.123696327 |
| 4.904533386  | 3.664042234 | 9.084563255 |
| 3.468230486  | 1.115247250 | 9.038933754 |
| 0.646949053  | 5.942135334 | 9.187325478 |
| 4.886509895  | 1.126804590 | 9.045935631 |
| 6.948844910  | 4.735798359 | 8.980848312 |
| 7.617856503  | 3.473289728 | 8.985312462 |
| 9.821089745  | 4.651424885 | 8.913599968 |
| 9.083967209  | 3.427680254 | 8.961011887 |
| 7.714703560  | 5.938503742 | 8.906795502 |
| 13.952239990 | 2.218375444 | 9.027990341 |
| 11.036751747 | 2.219340801 | 8.994078636 |
| 11.765162468 | 3.449209690 | 8.963873863 |
| 13.227128983 | 3.449858189 | 8.996399879 |
| 11.773354530 | 0.936570883 | 9.034955978 |
| 9.130105019  | 5.945968151 | 8.875692368 |

|              |              |              |
|--------------|--------------|--------------|
| 13.215220451 | 0.935345948  | 9.036773682  |
| -5.592252731 | 11.962347031 | 8.933291435  |
| -4.864236832 | 10.738745689 | 8.916407585  |
| -2.681322098 | 11.964118958 | 9.024893761  |
| -3.411646366 | 10.740504265 | 8.974133492  |
| -4.856229782 | 13.235894203 | 8.977536201  |
| 1.360034943  | 9.465084076  | 9.218592644  |
| -1.483689308 | 9.534527779  | 9.062315941  |
| -0.736999512 | 10.757926941 | 9.105228424  |
| 0.723712444  | 10.718643188 | 9.164106369  |
| -0.803361654 | 8.237260818  | 9.102167130  |
| -3.417042732 | 13.242825508 | 9.013518333  |
| 0.603809834  | 8.262955666  | 9.211122513  |
| 2.748438358  | 11.770110130 | 9.161405563  |
| 3.464324474  | 10.513393402 | 9.197046280  |
| 5.609841824  | 11.770110130 | 9.065520287  |
| 4.897155285  | 10.509748459 | 9.115595818  |
| 3.470217705  | 13.047173500 | 9.105299950  |
| 9.842481613  | 9.535709381  | 8.862354279  |
| 7.000990391  | 9.464852333  | 8.960058212  |
| 7.637549400  | 10.725300789 | 8.953074455  |
| 9.097625732  | 10.762393951 | 8.905427933  |
| 7.752200127  | 8.270880699  | 8.880822182  |
| 4.886857986  | 13.045487404 | 9.077976227  |
| 9.160188675  | 8.241612434  | 8.844461441  |
| 4.601287365  | 7.508389473  | 11.091258049 |
| 6.941275597  | 2.332478285  | 9.019853592  |
| 5.590281487  | 4.837220192  | 9.057024002  |
| -1.487354994 | 7.085828781  | 9.062981606  |
| 2.750860691  | 4.797303200  | 9.166878700  |
| 1.410342693  | 2.318125248  | 9.068688393  |
| 1.319627285  | 7.110225677  | 9.315252304  |
| 15.290760040 | 2.228044987  | 9.057546616  |
| 13.840620041 | 4.637864113  | 9.005057335  |
| 7.023821354  | 7.114044666  | 8.894483566  |
| 11.155547142 | 4.637806892  | 8.918261528  |
| 9.695454597  | 2.233794689  | 8.994582176  |
| 9.849582672  | 7.086923599  | 8.834292412  |
| 2.740064144  | 9.327751160  | 9.272142410  |
| 1.415376663  | 11.862294197 | 9.155591965  |
| -5.546380043 | 14.380885124 | 8.996310234  |
| -1.344243526 | 11.953484535 | 9.085211754  |
| -2.810243130 | 9.547483444  | 8.993393898  |
| -2.732042789 | 14.390640259 | 9.039527893  |

|              |              |              |
|--------------|--------------|--------------|
| -5.466886520 | 9.547929764  | 8.868599892  |
| 9.708037376  | 11.955040932 | 8.927856445  |
| 2.771689415  | 14.196155548 | 9.073997498  |
| 6.943315506  | 11.861601830 | 9.004913330  |
| 5.627466679  | 9.328515053  | 9.069120407  |
| 5.581576347  | 14.198518753 | 9.050489426  |
| 3.135599613  | 7.540813446  | 9.830214500  |
| 5.149323940  | 7.420298100  | 9.239831924  |
| 3.771017313  | 6.574225426  | 11.437470436 |
| 5.056880474  | 8.168738365  | 11.852945328 |

C<sub>2</sub>N- FeMn\*COOH

| C            | N  | Fe | Mn           | O | H           |
|--------------|----|----|--------------|---|-------------|
| 49           | 24 | 1  | 1            | 2 | 1           |
| Cartesian    |    |    |              |   |             |
| -1.518651962 |    |    | 4.689022064  |   | 8.859077454 |
| -0.776934028 |    |    | 3.466761827  |   | 8.908506393 |
| 1.358148575  |    |    | 4.775413036  |   | 8.937053680 |
| 0.684923887  |    |    | 3.514662504  |   | 8.957790375 |
| -0.829620361 |    |    | 5.983954430  |   | 8.839925766 |
| 5.551239014  |    |    | 2.431291342  |   | 9.094644547 |
| 2.693505526  |    |    | 2.440845490  |   | 9.068850517 |
| 3.401215553  |    |    | 3.699189901  |   | 9.078425407 |
| 4.851518631  |    |    | 3.685283661  |   | 9.124631882 |
| 3.407320023  |    |    | 1.162268996  |   | 9.079974174 |
| 0.586313486  |    |    | 5.977325916  |   | 8.870526314 |
| 4.825449944  |    |    | 1.160539746  |   | 9.079631805 |
| 6.931388855  |    |    | 4.741735935  |   | 9.144486427 |
| 7.580515862  |    |    | 3.482426167  |   | 9.090756416 |
| 9.785272598  |    |    | 4.675418377  |   | 9.043109894 |
| 9.045886993  |    |    | 3.448359728  |   | 9.053009987 |
| 7.683903694  |    |    | 5.941212654  |   | 9.142866135 |
| 13.912788391 |    |    | 2.255180120  |   | 8.923751831 |
| 10.998946190 |    |    | 2.250554323  |   | 8.988462448 |
| 11.725909233 |    |    | 3.478693724  |   | 8.962326050 |
| 13.182916641 |    |    | 3.481878519  |   | 8.911007881 |
| 11.733775139 |    |    | 0.972582877  |   | 8.975987434 |
| 9.095035553  |    |    | 5.970480442  |   | 9.085554123 |
| 13.174253464 |    |    | 0.974312127  |   | 8.947566032 |
| -5.671699524 |    |    | 11.996629715 |   | 9.047267914 |
| -4.944416523 |    |    | 10.768418312 |   | 9.024966240 |
| -2.757907391 |    |    | 11.996441841 |   | 9.023903847 |
| -3.486692667 |    |    | 10.771371841 |   | 8.996129990 |
| -4.933671951 |    |    | 13.276127815 |   | 9.057240486 |

|              |              |              |
|--------------|--------------|--------------|
| 1.301953793  | 9.502220154  | 8.973648071  |
| -1.548485041 | 9.571850777  | 8.941607475  |
| -0.805023670 | 10.796287537 | 8.997426033  |
| 0.663051605  | 10.761514664 | 9.009216309  |
| -0.862433434 | 8.276832581  | 8.892323494  |
| -3.493094921 | 13.275522232 | 9.049194336  |
| 0.545387268  | 8.308261871  | 8.922798157  |
| 2.687678814  | 11.806928635 | 9.017352104  |
| 3.391716003  | 10.553729057 | 9.014147758  |
| 5.547150612  | 11.816007614 | 9.006606102  |
| 4.839116096  | 10.555660248 | 9.040103912  |
| 3.415846348  | 13.084885597 | 8.998038292  |
| 9.758216858  | 9.561274529  | 9.057042122  |
| 6.890635490  | 9.484538078  | 9.094949722  |
| 7.560324669  | 10.742506981 | 9.053748131  |
| 9.019802094  | 10.787238121 | 9.056861877  |
| 7.656555176  | 8.275578499  | 9.121985435  |
| 4.832978725  | 13.089035034 | 8.978724480  |
| 9.069468498  | 8.268128395  | 9.082980156  |
| 3.445406914  | 7.494454384  | 11.106557846 |
| 6.894118309  | 2.344439030  | 9.083951950  |
| 5.560221672  | 4.854642868  | 9.191789627  |
| -1.550261736 | 7.124838352  | 8.847720146  |
| 2.714259624  | 4.877439976  | 8.993483543  |
| 1.361270905  | 2.371386766  | 9.013715744  |
| 1.269998550  | 7.148745537  | 8.929602623  |
| 15.252528191 | 2.270311117  | 8.926343918  |
| 13.788578033 | 4.673357964  | 8.864981651  |
| 6.966422558  | 7.104000568  | 9.174870491  |
| 11.115420341 | 4.668429375  | 8.992134094  |
| 9.658689499  | 2.257442474  | 9.027143478  |
| 9.785851479  | 7.120500565  | 9.066366196  |
| 2.685060501  | 9.366241455  | 8.976437569  |
| 1.348476410  | 11.902946472 | 9.026405334  |
| 2.704573631  | 0.017263846  | 9.069966316  |
| -1.417849541 | 11.987737656 | 9.028367996  |
| -2.878816366 | 9.582471848  | 8.945136070  |
| 5.518320560  | 0.008934544  | 9.061326027  |
| 11.091476440 | 9.576535225  | 9.032832146  |
| 9.628482819  | 11.982910156 | 9.055944443  |
| 2.723401070  | 14.235583305 | 8.997714043  |
| 6.880058765  | 11.884356499 | 9.014400482  |
| 5.534631729  | 9.390018463  | 9.099431992  |
| 5.535691261  | 14.234848022 | 8.949888229  |



|             |             |              |
|-------------|-------------|--------------|
| 3.089584827 | 7.475980282 | 9.272195816  |
| 5.059100151 | 6.903131485 | 9.522467613  |
| 4.638192654 | 7.247716904 | 11.497914314 |
| 2.521980762 | 7.837829590 | 12.022451401 |
| 2.954594612 | 7.849011898 | 12.908663750 |

C<sub>2</sub>N-FeCr\*CO

|    |    |    |    |   |
|----|----|----|----|---|
| C  | N  | Fe | Cr | O |
| 49 | 24 | 1  | 1  | 1 |

Cartesian

|              |              |             |
|--------------|--------------|-------------|
| -1.392864943 | 4.711804867  | 8.988138199 |
| -0.661455631 | 3.490510464  | 9.008927345 |
| 1.504652023  | 4.784275532  | 9.033803940 |
| 0.799961567  | 3.530989647  | 9.028134346 |
| -0.688699722 | 5.997788429  | 8.999549866 |
| 5.651678085  | 2.337853193  | 9.018936157 |
| 2.770980835  | 2.386460066  | 9.033803940 |
| 3.508110762  | 3.617769957  | 9.035136223 |
| 4.947307587  | 3.573414326  | 9.035316467 |
| 3.467249393  | 1.102450728  | 9.024372101 |
| 0.737200499  | 6.008510113  | 9.039167404 |
| 4.891453266  | 1.085129261  | 9.012671471 |
| 7.028616428  | 4.659826279  | 9.050561905 |
| 7.676229477  | 3.409710646  | 9.026333809 |
| 9.860358238  | 4.666959286  | 9.013229370 |
| 9.142730713  | 3.423861504  | 9.013338089 |
| 7.732975006  | 5.880169868  | 9.050417900 |
| 14.022758484 | 2.289534569  | 8.996399879 |
| 11.120456696 | 2.289102316  | 8.991827965 |
| 11.831851959 | 3.521262407  | 8.991846085 |
| 13.294351578 | 3.523957491  | 8.986104012 |
| 11.849394798 | 1.021160841  | 8.985239983 |
| 9.139463425  | 5.944282055  | 9.026298523 |
| 13.282650948 | 1.007787824  | 8.995409966 |
| -5.651772022 | 11.941104889 | 9.016272545 |
| -4.926693916 | 10.705357552 | 9.006336212 |
| -2.752214909 | 11.942172050 | 8.999405861 |
| -3.464002371 | 10.709794998 | 9.001745224 |
| -4.912471771 | 13.221137047 | 9.015912056 |
| 1.340314388  | 9.576909065  | 9.075132370 |
| -1.493183136 | 9.564199448  | 9.012042046 |
| -0.774856091 | 10.807786942 | 9.009036064 |
| 0.690522194  | 10.822384834 | 9.021654129 |
| -0.773503304 | 8.287510872  | 9.026280403 |

|              |              |              |
|--------------|--------------|--------------|
| -3.479690552 | 13.211007118 | 9.004139900  |
| 0.630115509  | 8.347286224  | 9.077129364  |
| 2.715788364  | 11.893781662 | 8.993448257  |
| 3.419194221  | 10.653636932 | 9.034578323  |
| 5.595912933  | 11.838618279 | 9.022086143  |
| 4.863099575  | 10.601586342 | 9.028836250  |
| 3.477028847  | 13.146965981 | 8.983116150  |
| 9.759858131  | 9.518632889  | 9.011988640  |
| 6.875286579  | 9.450139999  | 9.031860352  |
| 7.572888851  | 10.704146385 | 9.029861450  |
| 9.032899857  | 10.743430138 | 9.021852493  |
| 7.633194447  | 8.225775719  | 9.033480644  |
| 4.900227070  | 13.124500275 | 9.003906250  |
| 9.055311203  | 8.233657837  | 9.017423630  |
| 3.769633293  | 7.355594158  | 11.155607224 |
| 7.000189781  | 2.257701874  | 9.016739845  |
| 5.651983261  | 4.750151157  | 9.070560455  |
| -1.430098534 | 7.122143269  | 9.000395775  |
| 2.865573883  | 4.819552898  | 9.022500992  |
| 1.440925002  | 2.364296675  | 9.024281502  |
| 1.388471127  | 7.203591824  | 9.121464729  |
| -1.279088974 | 2.296912909  | 9.007811546  |
| 13.911102295 | 4.709485054  | 8.977193832  |
| 6.966357708  | 7.027220726  | 9.069911957  |
| 11.193067551 | 4.696573257  | 9.000611305  |
| 9.783262253  | 2.254805326  | 9.000900269  |
| 9.799013138  | 7.105859280  | 9.016110420  |
| 2.709983349  | 9.492074966  | 9.118673325  |
| 1.371428490  | 11.973687172 | 8.993393898  |
| -5.576904774 | 14.382397652 | 9.025506020  |
| -1.415645123 | 11.976454735 | 8.997083664  |
| -2.825659752 | 9.535046577  | 9.002340317  |
| -2.761518002 | 14.337191582 | 9.001890182  |
| 11.096803665 | 9.520276070  | 9.003545761  |
| 9.649916649  | 11.935787201 | 9.023777962  |
| 2.810956001  | 14.304811478 | 8.974349976  |
| 6.926774979  | 11.866991997 | 9.018846512  |
| 5.513282776  | 9.405525208  | 9.018522263  |
| 5.625144958  | 14.256146431 | 9.004932404  |
| 3.177860260  | 7.696447849  | 9.525329590  |
| 5.077171326  | 6.599861622  | 9.296478271  |
| 3.995561600  | 7.224818707  | 12.307769775 |

C<sub>2</sub>N- FeCr\*CHO

| C            | N  | Fe | Cr | O            | H           |
|--------------|----|----|----|--------------|-------------|
| 49           | 24 | 1  | 1  | 1            | 1           |
| Cartesian    |    |    |    |              |             |
| -1.454263926 |    |    |    | 4.655430794  | 9.065303802 |
| -0.723344922 |    |    |    | 3.428472996  | 9.090522766 |
| 1.421546936  |    |    |    | 4.723996162  | 9.145889282 |
| 0.738271713  |    |    |    | 3.470883369  | 9.113435745 |
| -0.755489826 |    |    |    | 5.951501846  | 9.114246368 |
| 5.607556343  |    |    |    | 2.415338993  | 9.039186478 |
| 2.748367310  |    |    |    | 2.387094021  | 9.072576523 |
| 3.450345755  |    |    |    | 3.644299984  | 9.089136124 |
| 4.910839081  |    |    |    | 3.674245119  | 9.062064171 |
| 3.467681170  |    |    |    | 1.117005467  | 9.034110069 |
| 0.664054394  |    |    |    | 5.952885151  | 9.193626404 |
| 4.886002541  |    |    |    | 1.134024262  | 9.033300400 |
| 6.967131615  |    |    |    | 4.738680840  | 8.984142303 |
| 7.626109600  |    |    |    | 3.473232031  | 8.982126236 |
| 9.832878113  |    |    |    | 4.653975487  | 8.895438194 |
| 9.095407486  |    |    |    | 3.429452896  | 8.950086594 |
| 7.730827332  |    |    |    | 5.932566643  | 8.931852341 |
| 13.964630127 |    |    |    | 2.222885847  | 9.033335686 |
| 11.049871445 |    |    |    | 2.225926638  | 8.978148460 |
| 11.776834488 |    |    |    | 3.454786539  | 8.945783615 |
| 13.239442825 |    |    |    | 3.455017328  | 8.991558075 |
| 11.785408974 |    |    |    | 0.944078743  | 9.019098282 |
| 9.140853882  |    |    |    | 5.947005749  | 8.870561600 |
| 13.226768494 |    |    |    | 0.936815798  | 9.032346725 |
| -5.599257946 |    |    |    | 11.961568832 | 8.923049927 |
| -4.870211124 |    |    |    | 10.738947868 | 8.895618439 |
| -2.688934803 |    |    |    | 11.967822075 | 9.016056061 |
| -3.416505575 |    |    |    | 10.741541862 | 8.963928223 |
| -4.864000320 |    |    |    | 13.237997055 | 8.970804214 |
| 1.362522602  |    |    |    | 9.482073784  | 9.242424011 |
| -1.484238625 |    |    |    | 9.542626381  | 9.096570015 |
| -0.742324829 |    |    |    | 10.768388748 | 9.129708290 |
| 0.718636513  |    |    |    | 10.736138344 | 9.182790756 |
| -0.796930313 |    |    |    | 8.245892525  | 9.153107643 |
| -3.424771786 |    |    |    | 13.247393608 | 8.999549866 |
| 0.612696171  |    |    |    | 8.272667885  | 9.255311966 |
| 2.747797489  |    |    |    | 11.785428047 | 9.131958008 |
| 3.462118149  |    |    |    | 10.534505844 | 9.160956383 |
| 5.605789661  |    |    |    | 11.760642052 | 9.046854019 |
| 4.899019718  |    |    |    | 10.502196312 | 9.085428238 |
| 3.472038746  |    |    |    | 13.057735443 | 9.079614639 |

|              |              |              |
|--------------|--------------|--------------|
| 9.837489128  | 9.534008980  | 8.852705956  |
| 6.983027935  | 9.448670387  | 8.966735840  |
| 7.625553131  | 10.711294174 | 8.950337410  |
| 9.091786385  | 10.756139755 | 8.901810646  |
| 7.746360302  | 8.265520096  | 8.920169830  |
| 4.888805389  | 13.044276237 | 9.061794281  |
| 9.152884483  | 8.239249229  | 8.851338387  |
| 4.588202477  | 7.438973904  | 11.142810822 |
| 6.948588371  | 2.333530188  | 9.013175964  |
| 5.598176003  | 4.859830379  | 9.041562080  |
| -1.475366354 | 7.092443466  | 9.109476089  |
| 2.763282061  | 4.797519207  | 9.114713669  |
| 1.415516973  | 2.325993538  | 9.078534126  |
| 1.335725784  | 7.121768951  | 9.335556030  |
| 15.302754402 | 2.235249996  | 9.077004433  |
| 13.852267265 | 4.644291878  | 9.009503365  |
| 7.025052071  | 7.104245663  | 8.970983505  |
| 11.167486191 | 4.643239498  | 8.893079758  |
| 9.707901001  | 2.237570286  | 8.980361938  |
| 9.854557037  | 7.092256069  | 8.828568459  |
| 2.736418724  | 9.362682343  | 9.262439728  |
| 1.411374092  | 11.874672890 | 9.148283958  |
| -5.551263809 | 14.385192871 | 8.997444153  |
| -1.353353977 | 11.961251259 | 9.089729309  |
| -2.809694529 | 9.550683022  | 9.004482269  |
| -2.736968040 | 14.394819260 | 9.023292542  |
| -5.472062111 | 9.545884132  | 8.845541954  |
| 9.698504448  | 11.950226784 | 8.924453735  |
| 2.777779579  | 14.207107544 | 9.048851967  |
| 6.943881512  | 11.851601601 | 8.990298271  |
| 5.606092930  | 9.301812172  | 9.039329529  |
| 5.588356972  | 14.195997238 | 9.046115875  |
| 3.150965214  | 7.594492912  | 9.849978447  |
| 5.093087196  | 7.214918613  | 9.245088577  |
| 3.644780397  | 6.582021236  | 11.439431190 |
| 5.011514187  | 8.099237442  | 11.923254013 |

C<sub>2</sub>N- FeCr\*COOH

| C  | N  | Fe | Cr | O | H |
|----|----|----|----|---|---|
| 49 | 24 | 1  | 1  | 2 | 1 |

Cartesian

|              |             |             |
|--------------|-------------|-------------|
| -1.319767952 | 4.739559650 | 9.091781616 |
| -0.606653452 | 3.516406298 | 9.096012115 |
| 1.600147009  | 4.779981136 | 9.144377708 |

|              |              |             |
|--------------|--------------|-------------|
| 0.858923674  | 3.535730839  | 9.124919891 |
| -0.579593658 | 6.007385731  | 9.110861778 |
| 5.681806564  | 2.235869884  | 8.974205971 |
| 2.784992933  | 2.318182945  | 9.085986137 |
| 3.549836874  | 3.521032095  | 9.080369949 |
| 4.966795921  | 3.449108839  | 9.020249367 |
| 3.472999811  | 1.028394938  | 9.045413971 |
| 0.863695145  | 6.020845413  | 9.144215584 |
| 4.903178215  | 0.996374607  | 8.986392021 |
| 6.999689102  | 4.604187012  | 9.013715744 |
| 7.677927971  | 3.368179321  | 8.968121529 |
| 9.829400063  | 4.680923462  | 9.021005630 |
| 9.143953323  | 3.424567699  | 8.970587730 |
| 7.641473770  | 5.853769302  | 9.059453964 |
| 14.052309036 | 2.350376129  | 9.025704384 |
| 11.155113220 | 2.351874828  | 8.954010010 |
| 11.849755287 | 3.595476866  | 9.007524490 |
| 13.327437401 | 3.597321510  | 9.033191681 |
| 11.883421898 | 1.089437962  | 8.931635857 |
| 9.057622910  | 5.931643963  | 9.058338165 |
| 13.310612679 | 1.068701267  | 8.979840279 |
| -5.662302971 | 11.865219116 | 9.043308258 |
| -4.947032928 | 10.613258362 | 9.038375854 |
| -2.771922112 | 11.862957001 | 8.962074280 |
| -3.468060255 | 10.615752220 | 9.008802414 |
| -4.923136234 | 13.146317482 | 9.027143478 |
| 1.388127804  | 9.617186546  | 9.002465248 |
| -1.446133614 | 9.532568932  | 9.009234428 |
| -0.760287762 | 10.790393829 | 8.942436218 |
| 0.701445103  | 10.847473145 | 8.921339989 |
| -0.681053162 | 8.286357880  | 9.061397552 |
| -3.497867107 | 13.127554893 | 8.976185799 |
| 0.728963852  | 8.356003761  | 9.079631805 |
| 2.702774525  | 11.976959229 | 8.885268211 |
| 3.417386532  | 10.753459930 | 8.954532623 |
| 5.603182793  | 11.897787094 | 8.999981880 |
| 4.848597050  | 10.686594963 | 9.009954453 |
| 3.484257698  | 13.219466209 | 8.895959854 |
| 9.695280075  | 9.472173691  | 9.080297470 |
| 6.797013283  | 9.446652412  | 9.096462250 |
| 7.536397934  | 10.689591408 | 9.074016571 |
| 8.996591568  | 10.704953194 | 9.075203896 |
| 7.509712219  | 8.186550140  | 9.109980583 |
| 4.913469791  | 13.185832024 | 8.957717896 |

|              |              |              |
|--------------|--------------|--------------|
| 8.946121216  | 8.207229614  | 9.095957756  |
| 4.591875076  | 6.915726662  | 11.344265938 |
| 7.034619331  | 2.191153765  | 8.945460320  |
| 5.630271912  | 4.641812801  | 9.045162201  |
| -1.325884581 | 7.115082264  | 9.088811874  |
| 2.974722862  | 4.765729427  | 9.126846313  |
| 1.456292272  | 2.340994835  | 9.111348152  |
| 1.528335094  | 7.229199409  | 9.165204048  |
| -1.250952244 | 2.335014582  | 9.059976578  |
| -2.662004948 | 4.765902042  | 9.063504219  |
| 6.824996948  | 6.979479313  | 9.106163979  |
| 11.167990685 | 4.750526428  | 9.037008286  |
| 9.820608139  | 2.279605865  | 8.934966087  |
| 9.701030731  | 7.091520786  | 9.083915710  |
| 2.746364117  | 9.582846642  | 9.029124260  |
| 1.358323574  | 12.021458626 | 8.863253593  |
| -5.579291344 | 14.313903809 | 9.060534477  |
| -1.439812660 | 11.934764862 | 8.918729782  |
| -2.786604404 | 9.464406013  | 9.030258179  |
| -2.766075611 | 14.244791031 | 8.952425957  |
| 11.040529251 | 9.444879532  | 9.059562683  |
| 9.640701294  | 11.883736610 | 9.059543610  |
| 2.833941460  | 14.381201744 | 8.881307602  |
| 6.932582378  | 11.878520966 | 9.036234856  |
| 5.436248302  | 9.466899872  | 9.075437546  |
| 5.644994736  | 14.312204361 | 8.990262032  |
| 3.375428200  | 7.834024906  | 9.522846222  |
| 4.818438530  | 6.358153343  | 9.393533707  |
| 5.263829708  | 6.421271801  | 12.392009735 |
| 3.758946419  | 7.850265980  | 11.535570145 |
| 4.978439331  | 6.901733875  | 13.208364487 |

C<sub>2</sub>N-MnCr\*CO

| C  | N  | Cr | Mn | O |
|----|----|----|----|---|
| 49 | 24 | 1  | 1  | 1 |

Cartesian

|              |             |             |
|--------------|-------------|-------------|
| -1.282029867 | 4.769591331 | 9.108449936 |
| -0.582576632 | 3.545371294 | 9.125820160 |
| 1.640854836  | 4.817953110 | 9.185778618 |
| 0.886752844  | 3.568975925 | 9.169145584 |
| -0.525673628 | 6.036336899 | 9.096876144 |
| 5.692856789  | 2.188199759 | 8.995734215 |
| 2.791748524  | 2.319191456 | 9.121500015 |
| 3.563806534  | 3.505079508 | 9.132966042 |

|              |              |              |
|--------------|--------------|--------------|
| 4.982006073  | 3.404666662  | 9.061650276  |
| 3.457833052  | 1.015843272  | 9.063467026  |
| 0.925734758  | 6.068386078  | 9.119411469  |
| 4.889001846  | 0.960895836  | 8.992403984  |
| 7.001564026  | 4.557424545  | 9.093132019  |
| 7.693295479  | 3.331965446  | 9.015462875  |
| 9.828060150  | 4.682580471  | 9.097956657  |
| 9.158164978  | 3.415892601  | 9.014976501  |
| 7.626557350  | 5.828277111  | 9.180990219  |
| 14.075994492 | 2.373533964  | 9.031698227  |
| 11.186238289 | 2.381113768  | 8.953866005  |
| 11.870429039 | 3.628894806  | 9.039258003  |
| 13.355216980 | 3.628866196  | 9.053063393  |
| 11.911616325 | 1.123663068  | 8.893926620  |
| 9.036890030  | 5.913775444  | 9.170495987  |
| 13.333666801 | 1.088083506  | 8.958815575  |
| -5.720541000 | 11.841384888 | 9.066905975  |
| -4.991926193 | 10.588992119 | 9.057095528  |
| -2.826416969 | 11.837623596 | 8.905409813  |
| -3.507986307 | 10.588962555 | 8.978382111  |
| -4.976631641 | 13.128391266 | 9.035712242  |
| 1.357301235  | 9.660951614  | 8.809793472  |
| -1.462257862 | 9.536949158  | 8.916678429  |
| -0.796071529 | 10.805078506 | 8.818019867  |
| 0.666642189  | 10.886511803 | 8.757450104  |
| -0.665370464 | 8.304125786  | 8.967383385  |
| -3.553217888 | 13.095751762 | 8.954261780  |
| 0.742440701  | 8.394105911  | 8.936964035  |
| 2.664118290  | 12.035408020 | 8.745353699  |
| 3.380386353  | 10.821808815 | 8.793882370  |
| 5.564328194  | 11.892973900 | 8.957843781  |
| 4.783559322  | 10.713095665 | 8.923248291  |
| 3.467217445  | 13.260882378 | 8.803080559  |
| 9.645195007  | 9.453151703  | 9.163097382  |
| 6.702067852  | 9.401317596  | 9.139896393  |
| 7.457651615  | 10.642252922 | 9.114642143  |
| 8.932390213  | 10.669748306 | 9.133740425  |
| 7.437680721  | 8.163263321  | 9.223631859  |
| 4.897288322  | 13.201005936 | 8.901144028  |
| 8.893239975  | 8.191175461  | 9.213461876  |
| 3.921921730  | 7.580240250  | 11.005685806 |
| 7.043256760  | 2.152360678  | 8.965278625  |
| 5.648651123  | 4.577642441  | 9.104976654  |
| -1.291898727 | 7.128469944  | 9.046314240  |

|              |              |              |
|--------------|--------------|--------------|
| 3.021837950  | 4.766608715  | 9.204425812  |
| 1.459228516  | 2.368821621  | 9.157355309  |
| 1.593985081  | 7.294090271  | 9.045504570  |
| -1.225627303 | 2.364094734  | 9.077507973  |
| -2.628094196 | 4.795501232  | 9.082295418  |
| 6.798624516  | 6.932270050  | 9.257652283  |
| 11.169944763 | 4.771032333  | 9.108233452  |
| 9.852889061  | 2.288309813  | 8.942760468  |
| 9.653358459  | 7.094575882  | 9.213119507  |
| 2.715279102  | 9.641728401  | 8.810729980  |
| 1.315799713  | 12.071161270 | 8.718083382  |
| -5.612047195 | 14.309797287 | 9.085445404  |
| -1.496420860 | 11.933352470 | 8.811630249  |
| -2.801987171 | 9.446291924  | 8.981712341  |
| -2.804212570 | 14.203289032 | 8.936621666  |
| 10.990220070 | 9.424171448  | 9.115901947  |
| 9.580181122  | 11.851169586 | 9.097632408  |
| 11.161538124 | 0.020837663  | 8.802071571  |
| 6.891890526  | 11.851155281 | 9.049032211  |
| 5.306351662  | 9.429965019  | 9.043955803  |
| 5.648106575  | 14.314682007 | 8.964035988  |
| 3.603587627  | 7.972453117  | 9.228690147  |
| 4.823366165  | 6.234885693  | 9.619254112  |
| 4.017909050  | 7.508576870  | 12.189293861 |

C<sub>2</sub>N- MnCr\*CHO

| C  | N  | Cr | Mn | O | H |
|----|----|----|----|---|---|
| 49 | 24 | 1  | 1  | 1 | 1 |

Cartesian

|              |             |             |
|--------------|-------------|-------------|
| -1.460296154 | 4.674409389 | 9.016397476 |
| -0.725217462 | 3.447163343 | 9.069282532 |
| 1.406520844  | 4.748148441 | 9.170045853 |
| 0.733088017  | 3.490380764 | 9.122598648 |
| -0.769509315 | 5.966647625 | 9.051713943 |
| 5.607015133  | 2.432472944 | 9.079919815 |
| 2.746203899  | 2.415137053 | 9.125063896 |
| 3.453265190  | 3.675498724 | 9.159606934 |
| 4.906029701  | 3.684851170 | 9.113975525 |
| 3.463803768  | 1.144558430 | 9.077274323 |
| 0.639286041  | 5.960940838 | 9.164502144 |
| 4.882282734  | 1.153867602 | 9.070542336 |
| 6.984951973  | 4.744675636 | 8.980937958 |
| 7.630277634  | 3.483103514 | 8.991306305 |
| 9.844575882  | 4.665100574 | 8.852975845 |



|              |              |              |
|--------------|--------------|--------------|
| 9.099692345  | 3.444771290  | 8.940473557  |
| 7.747058868  | 5.933762550  | 8.885645866  |
| 13.965502739 | 2.241547585  | 9.016434669  |
| 11.051477432 | 2.240927935  | 8.970983505  |
| 11.782259941 | 3.465162277  | 8.914770126  |
| 13.240549088 | 3.469903231  | 8.957159996  |
| 11.785551071 | 0.959743083  | 9.019170761  |
| 9.157109261  | 5.961214542  | 8.810100555  |
| 13.226735115 | 0.961544335  | 9.027197838  |
| -5.609225273 | 11.984941483 | 8.929637909  |
| -4.880536079 | 10.759194374 | 8.877852440  |
| -2.696664333 | 11.987089157 | 9.002340317  |
| -3.424002171 | 10.761875153 | 8.935254097  |
| -4.871389389 | 13.263100624 | 8.990657806  |
| 1.356465816  | 9.491469383  | 9.218879700  |
| -1.489705086 | 9.561893463  | 9.028169632  |
| -0.747733116 | 10.786170959 | 9.082260132  |
| 0.718753338  | 10.751816750 | 9.151758194  |
| -0.804476738 | 8.264670372  | 9.072504044  |
| -3.431295395 | 13.267222404 | 9.011843681  |
| 0.602112770  | 8.298347473  | 9.198395729  |
| 2.749020100  | 11.797431946 | 9.139769554  |
| 3.453474522  | 10.547057152 | 9.182430267  |
| 5.608059883  | 11.801610947 | 9.056628227  |
| 4.899651051  | 10.539232254 | 9.094032288  |
| 3.472537994  | 13.072838783 | 9.084294319  |
| 9.822796822  | 9.554616928  | 8.809776306  |
| 6.952701569  | 9.472779274  | 8.926542282  |
| 7.621217251  | 10.732953072 | 8.941517830  |
| 9.081403732  | 10.778015137 | 8.890865326  |
| 7.724828243  | 8.268748283  | 8.844893456  |
| 4.890684128  | 13.076008797 | 9.064691544  |
| 9.135662079  | 8.261758804  | 8.778960228  |
| 4.638912678  | 7.057065487  | 11.314908028 |
| 6.950069904  | 2.342781544  | 9.041507721  |
| 5.605888367  | 4.874428272  | 9.071856499  |
| -1.487388849 | 7.116033077  | 9.017747879  |
| 2.757782221  | 4.838373184  | 9.195624352  |
| 1.414110780  | 2.347854376  | 9.111672401  |
| 1.313428402  | 7.133873940  | 9.300869942  |
| 15.303196907 | 2.252932072  | 9.065520287  |
| 13.847008705 | 4.660719872  | 8.955018044  |
| 7.041083813  | 7.100109577  | 8.916983604  |
| 11.174932480 | 4.653802395  | 8.841258049  |

|              |              |              |
|--------------|--------------|--------------|
| 9.710720062  | 2.253119230  | 8.984844208  |
| 9.847126007  | 7.110139370  | 8.755290031  |
| 2.741452217  | 9.363792419  | 9.283284187  |
| 1.404668331  | 11.889718056 | 9.137988091  |
| -5.555690289 | 14.410181046 | 9.030275345  |
| -1.358246803 | 11.978111267 | 9.066096306  |
| -2.817083120 | 9.571029663  | 8.946864128  |
| 5.577042103  | 0.003372070  | 9.045053482  |
| -5.483901501 | 9.569819450  | 8.804088593  |
| 9.691381454  | 11.971929550 | 8.935883522  |
| 2.777637482  | 14.223752022 | 9.055097580  |
| 6.939212799  | 11.873058319 | 8.994024277  |
| 5.597255707  | 9.367927551  | 9.007344246  |
| 5.589927673  | 14.223190308 | 9.044712067  |
| 3.144878387  | 7.466584206  | 9.898253441  |
| 5.166809082  | 6.894341469  | 9.438227654  |
| 3.442238331  | 6.752267838  | 11.719493866 |
| 5.353767872  | 7.394690514  | 12.097980499 |

C<sub>2</sub>N- MnCr\*COOH

| C  | N  | Cr | Mn | O | H |
|----|----|----|----|---|---|
| 49 | 24 | 1  | 1  | 2 | 1 |

Cartesian

|              |             |             |
|--------------|-------------|-------------|
| -1.442508340 | 4.664725780 | 8.982378006 |
| -0.711223245 | 3.435317993 | 9.042551994 |
| 1.423901320  | 4.725826740 | 9.114137650 |
| 0.748288631  | 3.468548775 | 9.096660614 |
| -0.743542433 | 5.950464249 | 8.984951973 |
| 5.620294094  | 2.402499199 | 9.097919464 |
| 2.757061720  | 2.386878014 | 9.129546165 |
| 3.465662479  | 3.646043539 | 9.156797409 |
| 4.912695408  | 3.648896933 | 9.131039619 |
| 3.479628325  | 1.116947770 | 9.090324402 |
| 0.667440891  | 5.940765858 | 9.060390472 |
| 4.899655342  | 1.124614239 | 9.082079887 |
| 6.981699467  | 4.729991436 | 9.025613785 |
| 7.635643005  | 3.471819878 | 9.027917862 |
| 9.842163086  | 4.661007881 | 8.903772354 |
| 9.104093552  | 3.438301086 | 8.976149559 |
| 7.730876923  | 5.929108143 | 8.939988136 |
| 13.971184731 | 2.244732380 | 9.004409790 |
| 11.059472084 | 2.242440939 | 8.980992317 |
| 11.787849426 | 3.470407724 | 8.933274269 |
| 13.248544693 | 3.474702120 | 8.954010010 |

|              |              |              |
|--------------|--------------|--------------|
| 11.794219971 | 0.961501062  | 9.013500214  |
| 9.145628929  | 5.953375340  | 8.874414444  |
| 13.233780861 | 0.967870533  | 9.017603874  |
| -5.583991051 | 11.956078529 | 8.960579872  |
| -4.860002518 | 10.725589752 | 8.912159920  |
| -2.671912193 | 11.957273483 | 8.994167328  |
| -3.399017096 | 10.729177475 | 8.939087868  |
| -4.847145081 | 13.234078407 | 9.009287834  |
| 1.408073902  | 9.467619896  | 9.108827591  |
| -1.453230858 | 9.537770271  | 8.974619865  |
| -0.715467930 | 10.760895729 | 9.026586533  |
| 0.753596306  | 10.726886749 | 9.076536179  |
| -0.757852077 | 8.245330811  | 8.987201691  |
| -3.407316685 | 13.238083839 | 9.017784119  |
| 0.655310154  | 8.270564079  | 9.065718651  |
| 2.768530846  | 11.795630455 | 9.096407890  |
| 3.475613594  | 10.548194885 | 9.129978180  |
| 5.632894516  | 11.818774223 | 9.062388420  |
| 4.923744678  | 10.560818672 | 9.089009285  |
| 3.488462925  | 13.074422836 | 9.064620018  |
| 9.829511642  | 9.535810471  | 8.871191978  |
| 6.959066391  | 9.478067398  | 8.971595764  |
| 7.639521599  | 10.733414650 | 8.980721474  |
| 9.098276138  | 10.765275955 | 8.937917709  |
| 7.714353085  | 8.257119179  | 8.905896187  |
| 4.908630371  | 13.086168289 | 9.058104515  |
| 9.127849579  | 8.249726295  | 8.849177361  |
| 4.568951130  | 7.061863899  | 11.471490860 |
| 6.963938713  | 2.325561047  | 9.065177917  |
| 5.601895332  | 4.841572285  | 9.109385490  |
| -1.452237368 | 7.101983070  | 8.948933601  |
| 2.777167559  | 4.819034100  | 9.161064148  |
| 1.423653960  | 2.322044849  | 9.111834526  |
| 1.365528107  | 7.103611469  | 9.118097305  |
| 15.309061050 | 2.246576786  | 9.047159195  |
| 13.862608910 | 4.660849571  | 8.938907623  |
| 7.019628048  | 7.094763279  | 8.965188026  |
| 11.173834801 | 4.656972885  | 8.883972168  |
| 9.719622612  | 2.248306274  | 9.002916336  |
| 9.836959839  | 7.097458363  | 8.826893806  |
| 2.789525032  | 9.352609634  | 9.168498993  |
| 1.424403667  | 11.873692513 | 9.082746506  |
| -5.535381317 | 14.379011154 | 9.050489426  |
| -1.331814289 | 11.950832367 | 9.031193733  |

|              |              |              |
|--------------|--------------|--------------|
| -2.784335613 | 9.541977882  | 8.926181793  |
| -2.722241879 | 14.386489868 | 9.051300049  |
| -5.474799156 | 9.540134430  | 8.859365463  |
| 9.717922211  | 11.953945160 | 8.972189903  |
| 2.789211273  | 14.223478317 | 9.039852142  |
| 6.964986801  | 11.880898476 | 9.020267487  |
| 5.611091137  | 9.394284248  | 9.034541130  |
| 5.602824211  | 14.233881950 | 9.036954880  |
| 3.279962540  | 7.334007740  | 9.646182060  |
| 5.136319160  | 6.805730820  | 9.540612221  |
| 5.426789284  | 7.115067959  | 12.499992371 |
| 3.324734211  | 7.212886333  | 11.705904007 |
| 4.915232658  | 7.281423569  | 13.329917908 |
